# Supplementary material
Source: publisher figshare collection journal article supplement (https://geolsoc.figshare.com/articles/dataset/_/3453197)

**Sample Information**

sample field number: ALT-35  
 project description: FWF P22-728  
 number of measurement: 090607  
 number of irradiation: 25-141  
 value of irradiation: 0.007883  
 duration of irradiation [h]: 16.0  
 year of irradiation: 2008  
 julian day of irradiation: 346

material: Polyhall  
 grain size: 200-250 µm  
 number: 5  
 notes: Altseeuse mine  
 (+/- 1-sigma)

conversion from [V] to [cps] by: 6E+07  
 composition of atmospheric argon: 40Ar/36Ar/jam. = 295.5  
 half-life of 37Ar [d]: 35.1  
 decay constant of 37Ar [E-01]: 1.975E-02  
 decay constant of 39Ar [E-01]: 7.984E-06  
 decay constant of 40K [E-01]: 5.543E-10  
 correction for Ca-derived Ar: (36Ar/37Ar)Ca = 2.250E-04  
 correction for K-derived Ar: (39Ar/37Ar)Ca = 6.140E-04  
 correction for K-derived Ar: (40Ar/39Ar)K = 2.660E-02  
 correction for K-derived Ar: (38Ar/39Ar)K = 1.170E-02

+/-  
 1sigma  
 (Steiger & Jäger 1977)  
 (Steininger et al. 1995)  
 (Steininger et al. 1995)  
 (Steiger & Jäger 1977)  
 Measured  
 Measured  
 Measured

| 36Ar        | +[%]        | 37Ar        | +[%]        | 38Ar        | +[%]        | 39Ar        | +[%]        | 40Ar        | +[%]        | date of measurement | year | day |
|-------------|-------------|-------------|-------------|-------------|-------------|-------------|-------------|-------------|-------------|---------------------|------|-----|
| 0906097a    | 1.74015E-06 | 4.3667      | 9.57728E-07 | 2.9525      | 1.20487E-06 | 4.9566      | 2.84534E-06 | 2.8322      | 4.59005E-04 | 0.1475              | 2009 | 184 |
| c 3.6%      | 3.74461E-06 | 2.8439      | 1.62966E-06 | 2.3245      | 2.29033E-06 | 2.9781      | 5.93096E-05 | 0.3993      | 1.59896E-03 | 0.1095              | 2009 | 184 |
| 090702a     | 1.42426E-06 | 2.8474      | 1.42064E-06 | 1.4312      | 1.56183E-06 | 2.5052      | 4.39525E-06 | 2.9886      | 2.76317E-04 | 0.2623              | 2009 | 190 |
| g 3.8%      | 2.79708E-06 | 1.9709      | 2.73152E-05 | 0.3259      | 3.92728E-05 | 0.4513      | 3.40428E-03 | 0.0620      | 4.69421E-02 | 0.0294              | 2009 | 190 |
| 0906097c    | 1.34618E-06 | 2.5097      | 1.42064E-06 | 1.4312      | 2.06707E-06 | 2.8132      | 6.53527E-06 | 3.6892      | 2.70937E-04 | 0.3789              | 2009 | 190 |
| f 3.9%      | 1.52941E-06 | 3.4837      | 1.08000E-05 | 1.0035      | 1.47988E-05 | 1.1229      | 1.2284E-03  | 0.0481      | 1.44772E-02 | 0.0354              | 2009 | 190 |
| 1.34618E-06 | 2.5097      | 1.42064E-06 | 1.4312      | 2.06707E-06 | 2.8132      | 6.53527E-06 | 3.6892      | 2.70937E-04 | 0.3789      | 2009                | 190  |     |
| g 4.0%      | 1.47517E-06 | 2.6569      | 6.83202E-06 | 1.6463      | 8.90477E-06 | 0.8911      | 7.04196E-03 | 0.1658      | 5.50496E-03 | 0.0439              | 2009 | 190 |
| 1.34618E-06 | 2.5097      | 1.42064E-06 | 1.4312      | 2.06707E-06 | 2.8132      | 6.53527E-06 | 3.6892      | 2.70937E-04 | 0.3789      | 2009                | 190  |     |
| h 4.2%      | 2.16061E-06 | 1.9249      | 2.54503E-05 | 0.4712      | 3.50376E-05 | 0.7685      | 3.03398E-03 | 0.0681      | 3.78225E-02 | 0.0218              | 2009 | 190 |
| 1.34618E-06 | 2.5097      | 1.42064E-06 | 1.4312      | 2.06707E-06 | 2.8132      | 6.53527E-06 | 3.6892      | 2.70937E-04 | 0.3789      | 2009                | 190  |     |
| i 4.4%      | 1.72706E-06 | 2.6363      | 2.03009E-05 | 0.5159      | 2.87271E-05 | 0.9166      | 2.46393E-03 | 0.0665      | 3.31266E-02 | 0.0804              | 2009 | 190 |
| 0906097e    | 8.65694E-07 | 2.8073      | 1.16439E-06 | 4.3021      | 1.19239E-06 | 4.4086      | 4.34932E-06 | 3.6901      | 2.11430E-04 | 0.3819              | 2009 | 191 |
| j 4.6%      | 1.99426E-06 | 1.9369      | 2.13634E-05 | 0.3359      | 3.04154E-05 | 0.5298      | 2.65617E-03 | 0.0548      | 3.69711E-02 | 0.0290              | 2009 | 191 |

| days elapsed | post-irrad. 37Ar decay factor | number of steps | mean of dec. 37Ar corr. factor |
|--------------|-------------------------------|-----------------|--------------------------------|
| 203          | 5.544E+01                     | 7               | 6.160E+01                      |
| 209          | 6.242E+01                     |                 |                                |
| 210          | 6.366E+01                     |                 |                                |

| 36Ar   | +/-         | 37Ar     | +/-         | 38Ar     | +/-         | 39Ar     | +/-         | 40Ar     | +/-         | %39Ar    | cum%39Ar | %40Ar*     | 36Ar/39Ar   | 36Ar/39Ar   | 36Ar/39Ar | 37Ar/39Ar   | 37Ar/39Ar | 38Ar/39Ar   | 38Ar/39Ar | 40Ar/39Ar   | 40Ar/39Ar   | 37Ar/39Ar   | 37Ar/39Ar   | 39ArK      | 39ArK       | 40Ar*       | 40Ar*     | 40Ar/39ArK | 40Ar/39ArK | age [Ma] | +/- 1-sigma [Ma] | +/- 1-sigma [Ma] |
|--------|-------------|----------|-------------|----------|-------------|----------|-------------|----------|-------------|----------|----------|------------|-------------|-------------|-----------|-------------|-----------|-------------|-----------|-------------|-------------|-------------|-------------|------------|-------------|-------------|-----------|------------|------------|----------|------------------|------------------|
| c 3.0% | 1.25122E+02 | 8.17E+00 | 4.18808E+01 | 2.05E+00 | 6.71888E+01 | 5.05E+00 | 3.53098E+03 | 1.56E+01 | 7.11520E+04 | 1.16E+02 | 0.42     | 48.16      | 0.05441814  | 0.002318473 | 0.011883  | 0.00083715  | 0.010025  | 0.00160143  | 20.154320 | 0.005129796 | 0.65737183  | 0.046415014 | 3226.833813 | 15.65757   | 3.42386E+04 | 2415.953210 | 9.702325  | 0.689961   | 133.0      | 9.1      | 9.072E+00        |                  |
| g 3.8% | 8.50795E+01 | 4.26E+00 | 1.51629E+03 | 5.70E+00 | 2.35399E+03 | 1.13E+01 | 2.12272E+03 | 1.32E+02 | 2.91297E+06 | 8.63E+02 | 25.17    | 99.37      | 0.000401    | 2.00842E-05 | 0.007616  | 2.72703E-05 | 0.011092  | 6.30396E-05 | 13.72697  | 0.004945713 | 0.475361809 | 0.00170217  | 212165.5523 | 132.00275  | 288896.859  | 1528.75769  | 13.616234 | 0.011116   | 184.0      | 0.5      | 5.636E-01        |                  |
| f 3.9% | 1.14376E+01 | 3.94E+00 | 5.85478E+02 | 6.88E+00 | 7.94727E+02 | 1.10E+01 | 7.59117E+04 | 3.97E+01 | 8.86783E+05 | 3.29E+02 | 34.59    | 99.89      | 0.000151    | 5.18778E-05 | 0.007713  | 9.07633E-05 | 0.010469  | 0.000144872 | 11.681776 | 0.0074665   | 0.48141064  | 0.005665308 | 75889.21762 | 39.675846  | 883814.2656 | 1208.925510 | 11.646111 | 0.017054   | 158.5      | 0.4      | 5.215E-01        |                  |
| g 4.0% | 8.05181E+00 | 3.23E+00 | 3.37800E+02 | 7.14E+00 | 4.28823E+02 | 6.14E+00 | 4.35488E+04 | 7.44E+01 | 5.13984E+05 | 2.42E+02 | 5.17     | 99.76      | 0.000185    | 7.41703E-05 | 0.007757  | 0.000164562 | 0.009801  | 0.000142    | 11.802297 | 0.002918017 | 0.484161678 | 0.010271729 | 43336.50759 | 74.419586  | 511846.4641 | 985.507784  | 11.758756 | 0.030262   | 159.9      | 0.5      | 6.178E-01        |                  |
| h 4.2% | 5.08382E+01 | 3.34E+00 | 1.50054E+03 | 7.60E+00 | 2.05809E+03 | 1.70E+01 | 1.88808E+05 | 1.30E+02 | 2.34404E+06 | 5.19E+02 | 22.41    | 99.62      | 0.000269    | 1.77E-05    | 0.007940  | 0.00591E-05 | 0.010891  | 9.01713E-05 | 12.403674 | 0.00885359  | 0.49861684  | 0.002531642 | 188922.1878 | 129.848428 | 233021.899  | 1116.645713 | 12.334294 | 0.010335   | 167.4      | 0.4      | 5.153E-01        |                  |
| i 4.4% | 2.37753E+01 | 3.54E+00 | 1.17979E+03 | 6.67E+00 | 1.68417E+03 | 1.68E+01 | 1.53389E+05 | 1.03E+02 | 2.05092E+06 | 1.66E+03 | 18.19    | 99.90      | 0.000155    | 2.30719E-05 | 0.007891  | 4.37642E-05 | 0.010849  | 0.000109976 | 13.370120 | 0.014100904 | 0.49007193  | 0.002731698 | 153350.2109 | 103.380886 | 2044706.778 | 1965.348579 | 13.333577 | 0.019584   | 180.3      | 0.5      | 5.715E-01        |                  |
| j 4.6% | 6.46203E+01 | 2.94E+00 | 1.26807E+03 | 5.46E+00 | 1.82416E+03 | 1.08E+01 | 1.65532E+05 | 9.10E+01 | 2.29461E+06 | 6.71E+02 | 19.63    | 99.40      | 0.000392    | 1.71425E-05 | 0.007817  | 3.32948E-05 | 0.011020  | 6.42041E-05 | 13.862050 | 0.00832922  | 0.484929424 | 0.002117757 | 165482.5911 | 90.976295  | 2276395.241 | 1074.345338 | 13.756065 | 0.009957   | 185.7      | 0.5      | 5.650E-01        |                  |
| total  | 3.6912E+02  | 1.19E+01 | 6.52263E+03 | 1.65E+01 | 9.18912E+03 | 3.17E+01 | 8.43126E+05 | 2.46E+02 | 1.10745E+07 | 2.10E+03 | 100.00   | 99.0150624 | 0.000437806 | 1.41619E-05 | 0.007736  | 1.9675E-05  | 0.010899  | 3.7685E-05  | 13.134998 | 0.004573129 | 0.476553    | 0.001211983 | 8.42879E+05 | 246.185861 | 10989675.36 | 4106.463698 | 13.014527 | 0.006179   | 176.2      | 0.4      | 5.290E-01        |                  |

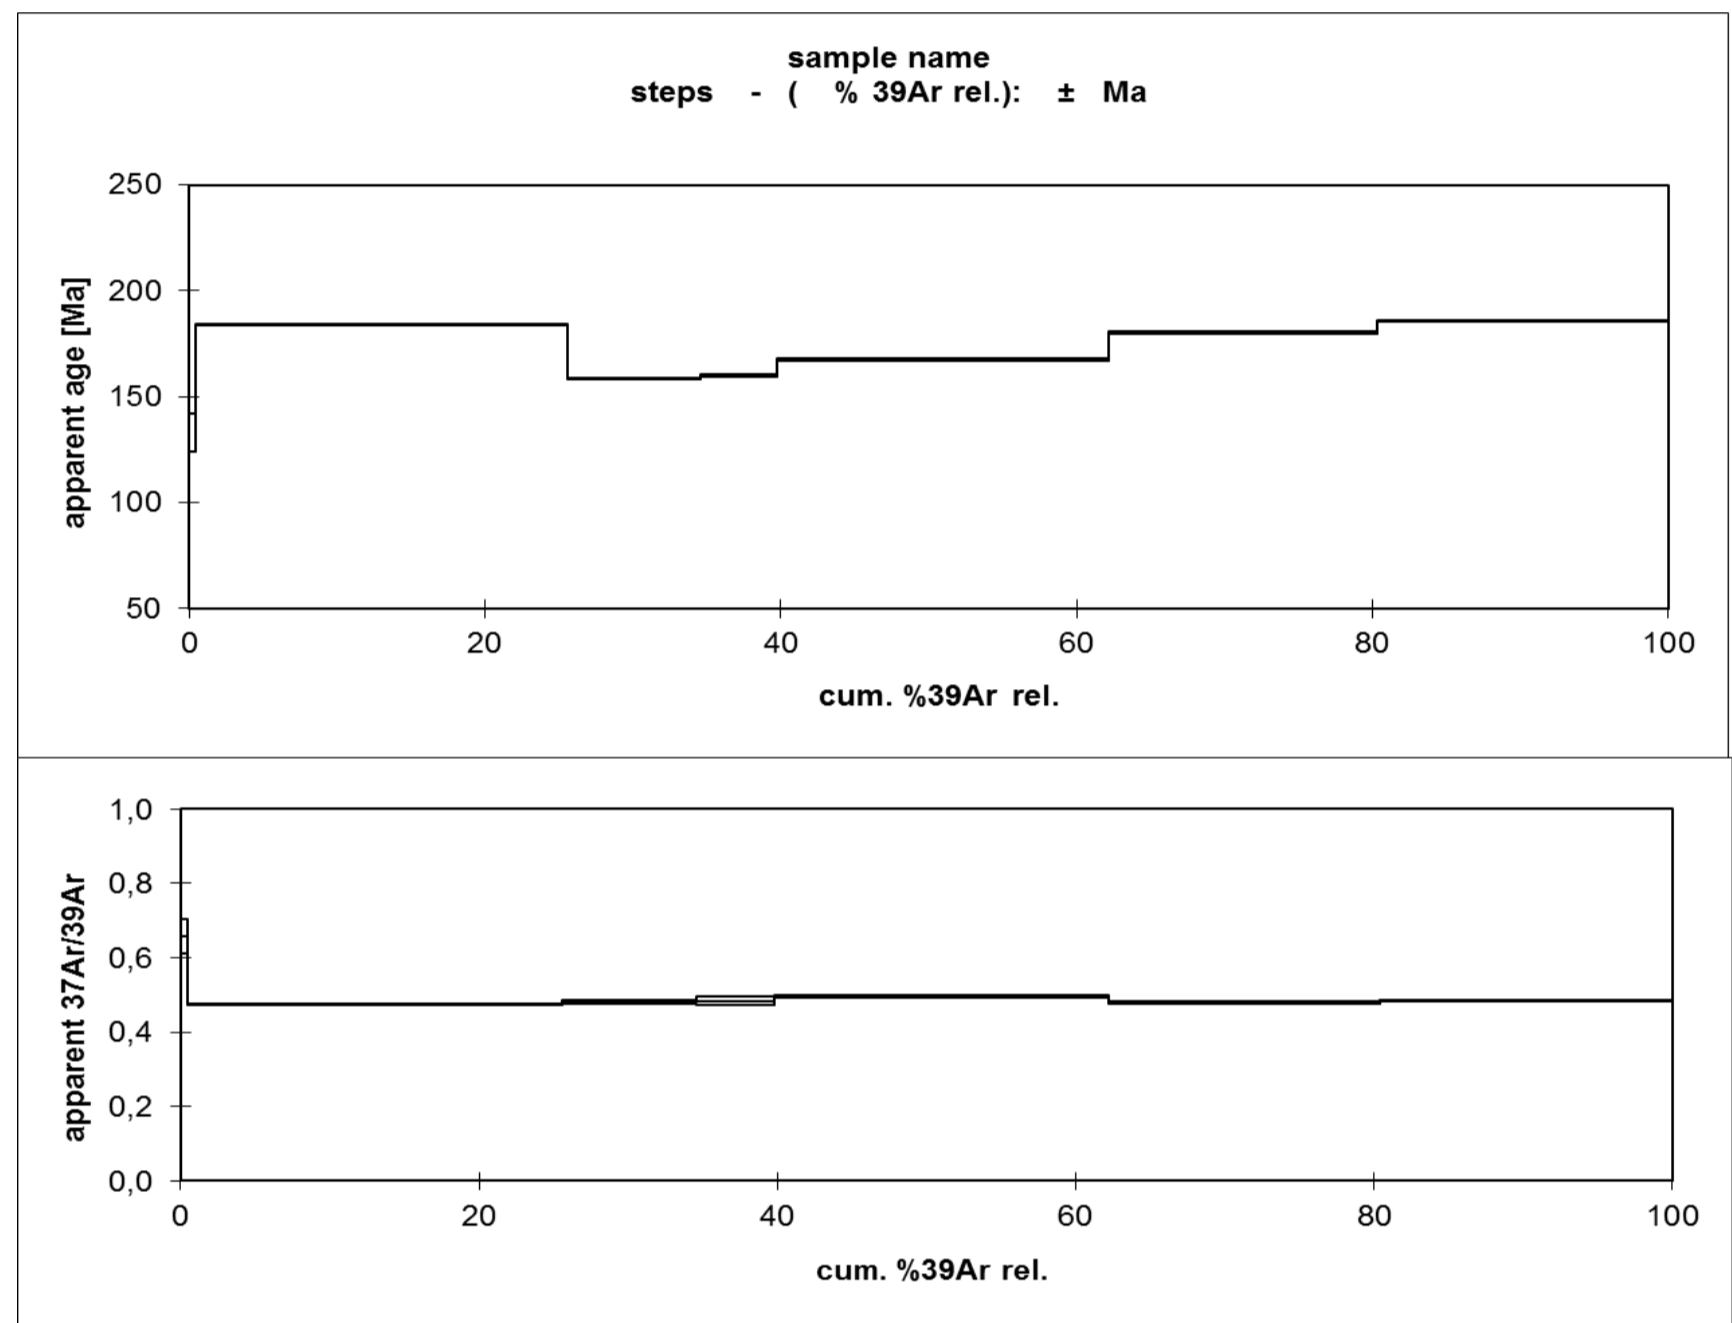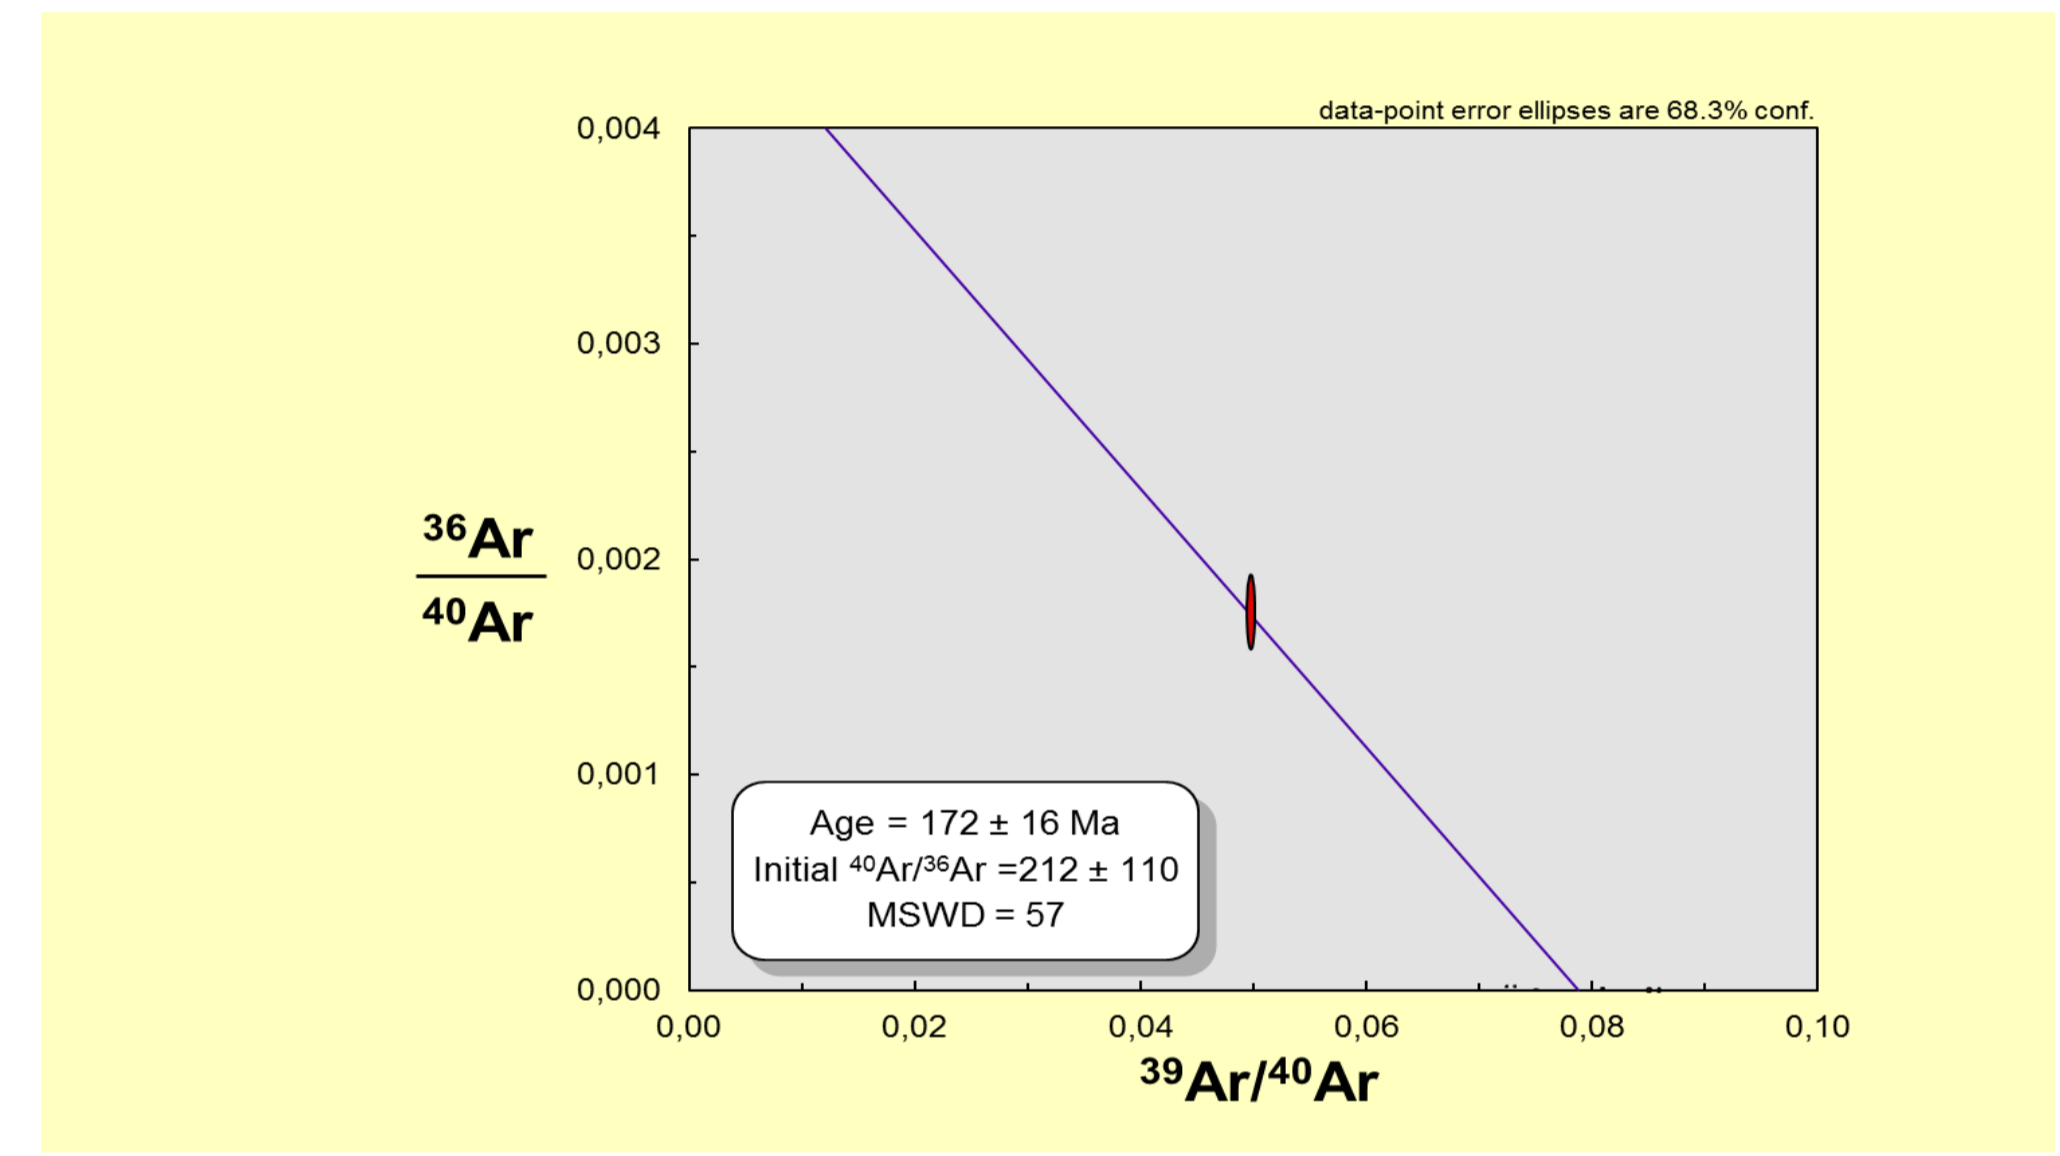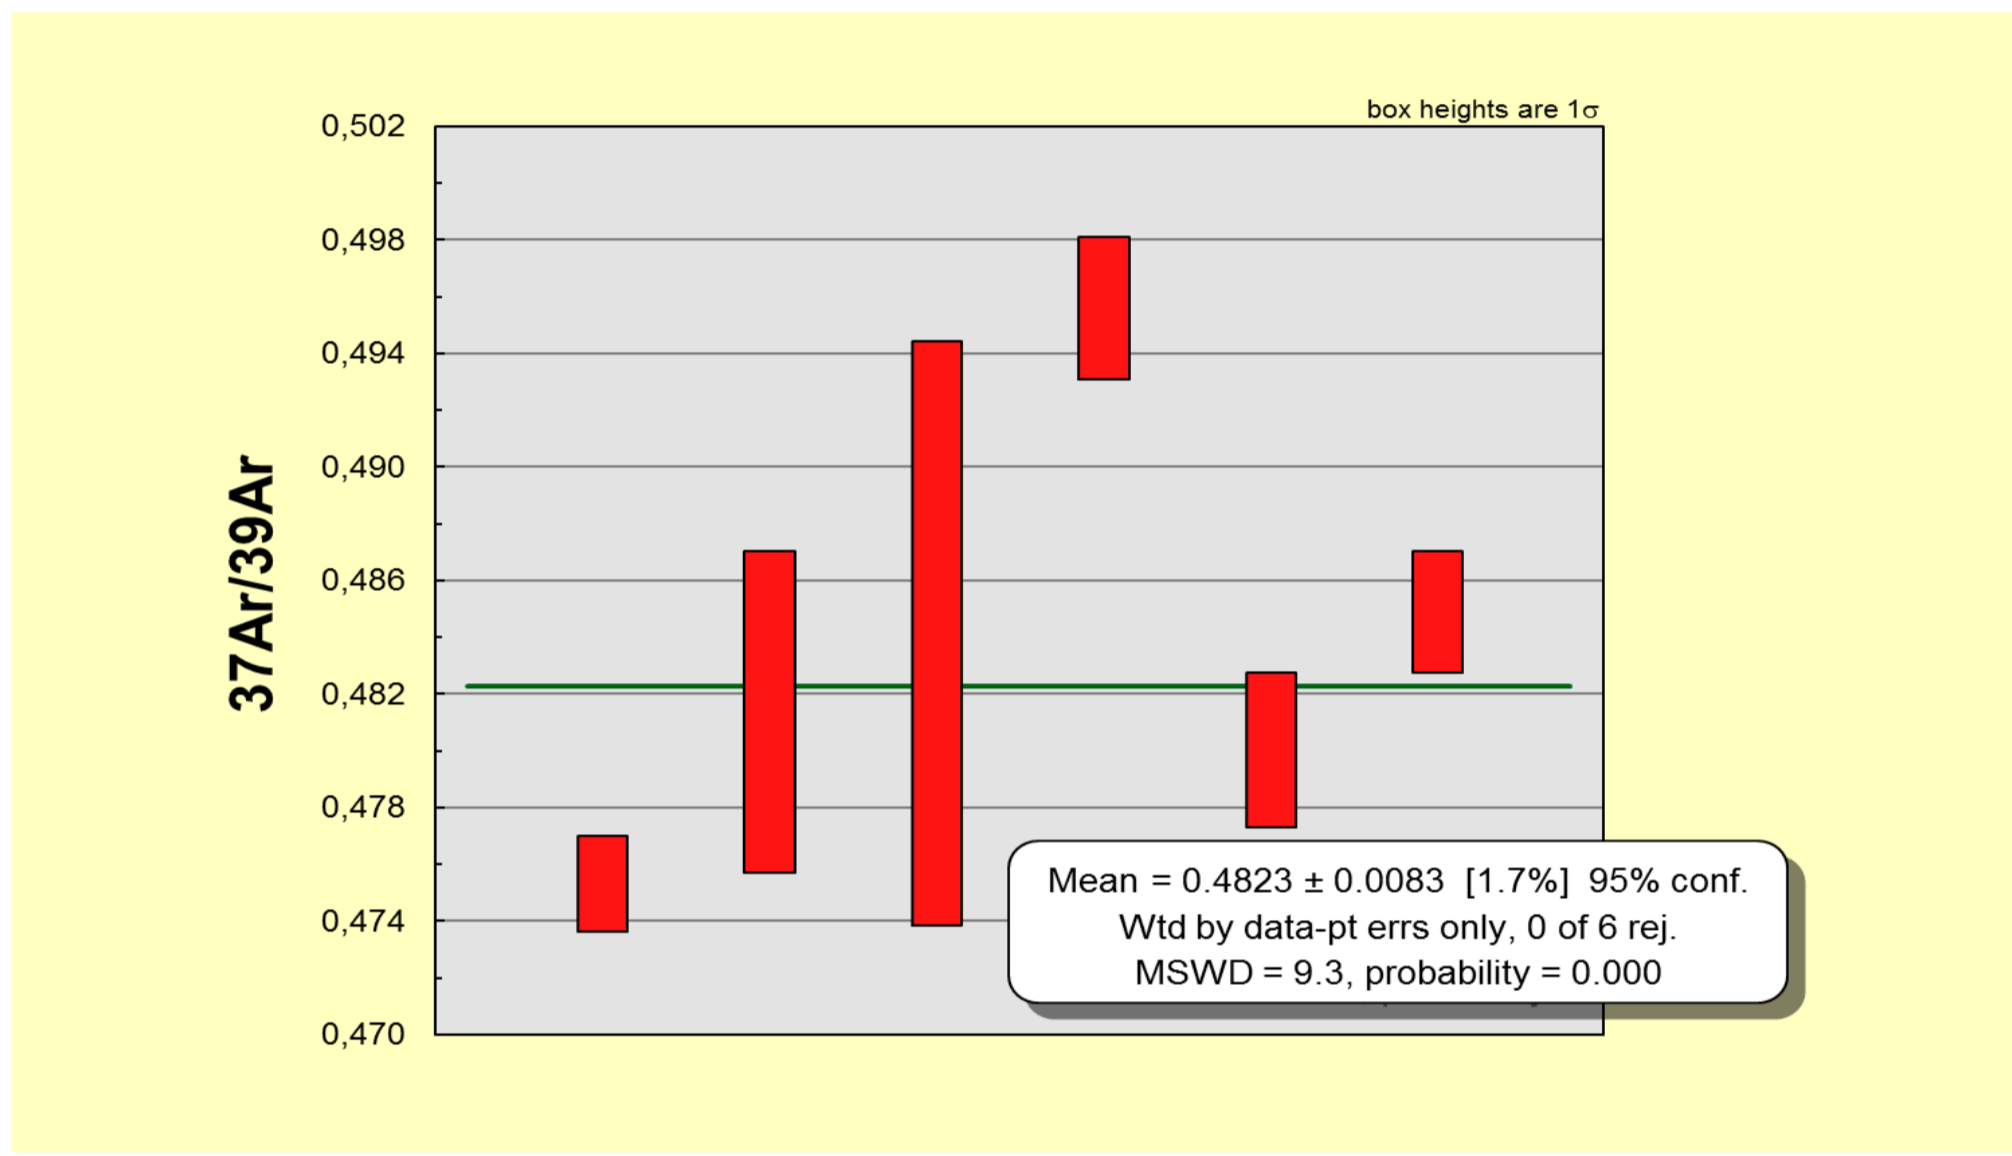

Supplement: Supplementary file 2 [file 1]
