# Supplementary material
Source: publisher figshare collection journal article supplement (https://geolsoc.figshare.com/articles/dataset/_/3453197)

**Sample Information**

sample field number ..... DU-9  
 project description ..... FWF P22-728  
 number of measurement ..... 096072  
 number of irradiation ..... 25-148  
 value of irradiation ..... 0.007944  
 duration of irradiation [h] ..... 16.0  
 year of irradiation ..... 2008  
 julian day of irradiation ..... 346

material: Polyhalt  
 grain size: 200-250 µm  
 number: 5  
 notes: Bad Dürrenberg mine  
 (+/- 1sigma)

conversion from [V] to [cps] by: 6E+07  
 composition of atmospheric argon: (40Ar/36Ar)atm. = 295.5  
 half-life of 37Ar [a]: = 35.1  
 decay constant of 37Ar [dE-01]: = 1.975E-02  
 decay constant of 39Ar [dE-1]: = 7.084E-06  
 decay constant of 40K [dE-01]: = 5.543E-10  
 correction for Ca-derived Ar: (36Ar/37Ar)Ca = Measured  
 correction for K-derived Ar: (39Ar/37Ar)Ca = Measured  
 correction for K-derived Ar: (40Ar/39Ar)K = Measured  
 correction for K-derived Ar: (38Ar/39Ar)K = Measured

±1sigma  
 (Steiger & Jäger 1977)  
 (Steininger et al. 1985)  
 (Steiger & Jäger 1977)  
 Measured  
 Measured  
 Measured

| sample  | 36Ar        | 37Ar   | 38Ar        | 39Ar    | 40Ar        | date of measurement | days elapsed | post-irrad. 37Ar decay factor | number of steps | mean of dec. 37Ar corr. factor |      |     |     |           |
|---------|-------------|--------|-------------|---------|-------------|---------------------|--------------|-------------------------------|-----------------|--------------------------------|------|-----|-----|-----------|
| 096071a | 8.09248E-07 | 4.0370 | 1.34063E-06 | 5.0565  | 1.36999E-06 | 2.7357              | 3.78995E-06  | 2.1206                        | 1.05749E-04     | 0.6205                         | 2009 | 176 | 9   | 4.745E+01 |
| a 3.4%  | 1.80297E-06 | 3.1028 | 1.76105E-05 | 0.7337  | 2.37020E-05 | 0.6031              | 1.59110E-03  | 0.1024                        | 2.42245E-02     | 0.0846                         | 2009 | 176 | 195 | 4.734E+01 |
| b 3.5%  | 1.27513E-06 | 2.8449 | 1.31824E-05 | 0.9966  | 1.38866E-05 | 1.2327              | 1.18876E-03  | 0.0745                        | 1.88694E-02     | 0.0830                         | 2009 | 176 | 195 | 4.734E+01 |
| c 3.6%  | 1.78005E-06 | 3.3389 | 1.03027E-06 | 13.2274 | 1.39900E-06 | 3.0582              | 2.72428E-06  | 4.5384                        | 1.24228E-04     | 0.3801                         | 2009 | 176 | 195 | 4.734E+01 |
| d 4.2%  | 1.57553E-06 | 3.0588 | 2.21871E-05 | 0.7286  | 2.47703E-05 | 0.6805              | 2.0048E-03   | 0.0932                        | 3.46434E-02     | 0.1582                         | 2009 | 176 | 195 | 4.734E+01 |
| e 3.9%  | 2.42541E-06 | 1.5342 | 2.72718E-05 | 0.5116  | 3.47528E-05 | 0.6105              | 2.61548E-03  | 0.0725                        | 3.98157E-02     | 0.0835                         | 2009 | 176 | 195 | 4.734E+01 |
| f 4.0%  | 1.57553E-06 | 3.0588 | 2.21871E-05 | 0.7286  | 2.47703E-05 | 0.6805              | 2.0048E-03   | 0.0932                        | 3.46434E-02     | 0.1582                         | 2009 | 176 | 195 | 4.734E+01 |
| g 4.2%  | 1.57553E-06 | 3.0588 | 2.21871E-05 | 0.7286  | 2.47703E-05 | 0.6805              | 2.0048E-03   | 0.0932                        | 3.46434E-02     | 0.1582                         | 2009 | 176 | 195 | 4.734E+01 |
| h 4.6%  | 1.64531E-06 | 3.7546 | 1.35494E-06 | 7.2015  | 2.75831E-06 | 2.6995              | 9.98480E-06  | 0.2027                        | 1.64424E-04     | 0.6348                         | 2009 | 176 | 195 | 4.734E+01 |
| i 4.9%  | 1.94298E-06 | 2.1424 | 7.00378E-06 | 1.2403  | 7.45524E-06 | 2.3003              | 4.02811E-04  | 0.2164                        | 5.86402E-03     | 0.0742                         | 2009 | 176 | 195 | 4.734E+01 |
| j 5.3%  | 1.00303E-06 | 6.0223 | 1.67061E-06 | 3.3028  | 1.84822E-06 | 2.8354              | 5.38601E-06  | 1.6705                        | 1.63437E-04     | 0.4699                         | 2009 | 177 | 196 | 4.820E+01 |
| k 5.3%  | 2.2827E-06  | 2.2955 | 3.38000E-05 | 0.9024  | 3.72268E-05 | 0.5435              | 3.09719E-03  | 0.0528                        | 4.82194E-02     | 0.0205                         | 2009 | 177 | 196 | 4.820E+01 |

| blank and background-corrected intensities and absolute errors (1-sigma abs.) | 36Ar        | 37Ar     | 38Ar        | 39Ar     | 40Ar        | 36Ar/38Ar | 37Ar/38Ar   | 39Ar/38Ar | 40Ar/38Ar   | 36Ar/39Ar | 37Ar/39Ar | 40Ar/39Ar   | 36Ar/40Ar  | 37Ar/40Ar   | 39Ar/40Ar   | age         | ±1sigma     | ±1sigma   |             |           |             |             |             |             |             |             |             |           |          |           |     |           |
|-------------------------------------------------------------------------------|-------------|----------|-------------|----------|-------------|-----------|-------------|-----------|-------------|-----------|-----------|-------------|------------|-------------|-------------|-------------|-------------|-----------|-------------|-----------|-------------|-------------|-------------|-------------|-------------|-------------|-------------|-----------|----------|-----------|-----|-----------|
| a 3.4%                                                                        | 6.20114E+01 | 4.04E+00 | 1.01506E+03 | 9.11E+00 | 1.39448E+03 | 9.23E+00  | 9.90787E+04 | 1.02E+02  | 1.50551E+06 | 1.28E+03  | 11.31     | 11.31       | 98.99      | 0.0002588   | 4.0815E-05  | 0.010250    | 9.2593E-05  | 0.014074  | 9.42469E-05 | 15.195087 | 0.00206507  | 0.485272837 | 0.004380501 | 99049.13358 | 101.822807  | 1.48775E+06 | 1751.163406 | 15.020288 | 0.023473 | 203.4     | 0.5 | 6.343E-01 |
| b 3.5%                                                                        | 2.90813E+01 | 3.05E+00 | 7.39249E+02 | 9.23E+00 | 7.87548E+02 | 1.10E+01  | 7.39625E+04 | 5.59E+01  | 1.17126E+06 | 9.78E+02  | 8.44      | 19.75       | 99.46      | 0.0003393   | 4.12023E-05 | 0.000995    | 0.000125    | 0.010648  | 0.000149123 | 15.839508 | 0.017783463 | 0.472176776 | 0.005917718 | 73941.06156 | 55.506184   | 1163030.646 | 1330.099525 | 15.729158 | 0.021519 | 212.4     | 0.5 | 6.439E-01 |
| c 3.6%                                                                        | 5.50708E+01 | 4.20E+00 | 1.25157E+03 | 1.70E+01 | 1.34789E+03 | 1.20E+01  | 1.25523E+05 | 8.70E+01  | 2.17871E+06 | 3.52E+03  | 14.33     | 34.08       | 99.42      | 0.000445    | 3.34485E-05 | 0.000971    | 0.000185248 | 0.010738  | 9.56242E-05 | 17.341051 | 0.036683035 | 0.472037478 | 0.00402085  | 125487.0728 | 87.949404   | 2160789.405 | 3798.887384 | 17.219219 | 0.032125 | 231.3     | 0.6 | 7.512E-01 |
| d 3.9%                                                                        | 9.61920E+01 | 2.97E+00 | 1.63805E+03 | 1.22E+01 | 2.08201E+03 | 1.35E+01  | 1.63084E+05 | 1.19E+02  | 2.46514E+06 | 2.07E+03  | 99.05     | 52.70       | 99.05      | 0.000590    | 1.81865E-05 | 0.010044    | 7.50013E-05 | 0.012786  | 8.33568E-05 | 15.114816 | 0.016788063 | 0.475481032 | 0.003550779 | 163046.3755 | 118.618302  | 2437529.658 | 2243.615018 | 14.949916 | 0.017540 | 202.5     | 0.5 | 5.999E-01 |
| e 4.0%                                                                        | 2.20293E+01 | 4.02E+00 | 1.03090E+02 | 1.09E+01 | 1.81554E+02 | 6.42E+00  | 8.43070E+03 | 1.54E+01  | 1.51148E+05 | 9.07E+01  | 0.96      | 53.86       | 95.28      | 0.002990    | 0.000477126 | 0.012228    | 0.001295078 | 0.021535  | 0.000762523 | 17.528173 | 0.0344798   | 0.578887311 | 0.061311302 | 8427.759953 | 15.407373   | 143799.0275 | 1192.633049 | 17.062544 | 0.144898 | 229.3     | 1.9 | 1.933E+00 |
| f 4.2%                                                                        | 4.31413E+01 | 3.53E+00 | 1.32065E+03 | 1.32E+01 | 1.48888E+03 | 1.05E+01  | 1.24704E+05 | 1.17E+02  | 2.15470E+06 | 3.45E+03  | 14.24     | 67.80       | 99.60      | 0.000346    | 2.82935E-05 | 0.010590    | 0.000106286 | 0.011699  | 8.77361E-05 | 17.278975 | 0.018141098 | 0.50136315  | 0.000323235 | 12485.4642  | 118.638750  | 2142941.391 | 3876.791213 | 17.188791 | 0.032891 | 231.9     | 0.6 | 7.556E-01 |
| g 4.6%                                                                        | 3.18034E+01 | 5.02E+00 | 7.57894E+02 | 7.66E+00 | 8.84051E+02 | 1.28E+01  | 6.37204E+04 | 1.26E+02  | 9.19048E+05 | 6.69E+02  | 7.27      | 75.17       | 99.24      | 0.000499    | 7.87907E-05 | 0.011884    | 0.000122479 | 0.013874  | 0.000204765 | 14.423139 | 0.0304369   | 0.563085384 | 0.005798382 | 63688.39413 | 126.225641  | 910341.8651 | 1627.349141 | 14.291441 | 0.038141 | 194.0     | 0.6 | 7.251E-01 |
| h 4.9%                                                                        | 1.85818E+01 | 4.65E+00 | 3.52612E+02 | 8.15E+00 | 2.83210E+02 | 1.17E+01  | 2.45145E+04 | 5.59E+01  | 3.55796E+05 | 2.79E+02  | 2.80      | 77.37       | 98.77      | 0.000758    | 0.000189886 | 0.014384    | 0.000334265 | 0.011861  | 0.000478558 | 14.521463 | 0.034861981 | 0.680186882 | 0.015824688 | 24504.2447  | 55.833741   | 350733.8586 | 1402.376252 | 14.313177 | 0.066570 | 194.3     | 0.9 | 1.002E+00 |
| i 5.3%                                                                        | 7.64818E+01 | 4.94E+00 | 2.08014E+03 | 1.94E+01 | 2.20834E+03 | 1.30E+01  | 1.92298E+05 | 1.02E+02  | 2.99765E+06 | 8.19E+02  | 22.03     | 100.00      | 99.46      | 0.000396    | 2.56532E-05 | 0.010395    | 0.00011043  | 0.011462  | 6.78731E-05 | 15.543068 | 0.008359944 | 0.501919922 | 0.004649358 | 192236.4023 | 102.236239  | 2978456.036 | 1587.080460 | 15.437502 | 0.011601 | 208.7     | 0.5 | 5.916E-01 |
| total                                                                         | 4.38410E+02 | 1.23E+01 | 9.18489E+03 | 3.74E+01 | 1.06379E+04 | 3.41E+01  | 8.76024E+05 | 2.80E+02  | 1.38991E+07 | 5.65E+03  | 100.00    | 99.06792197 | 0.00050455 | 1.40708E-05 | 0.010485    | 4.27957E-05 | 0.012143    | 15.866097 | 0.008206491 | 0.497465  | 0.002030513 | 8.75756E+05 | 280.354591  | 13775212.2  | 6721.371176 | 15.729501   | 0.009179    | 212.4     | 0.5      | 5.843E-01 |     |           |

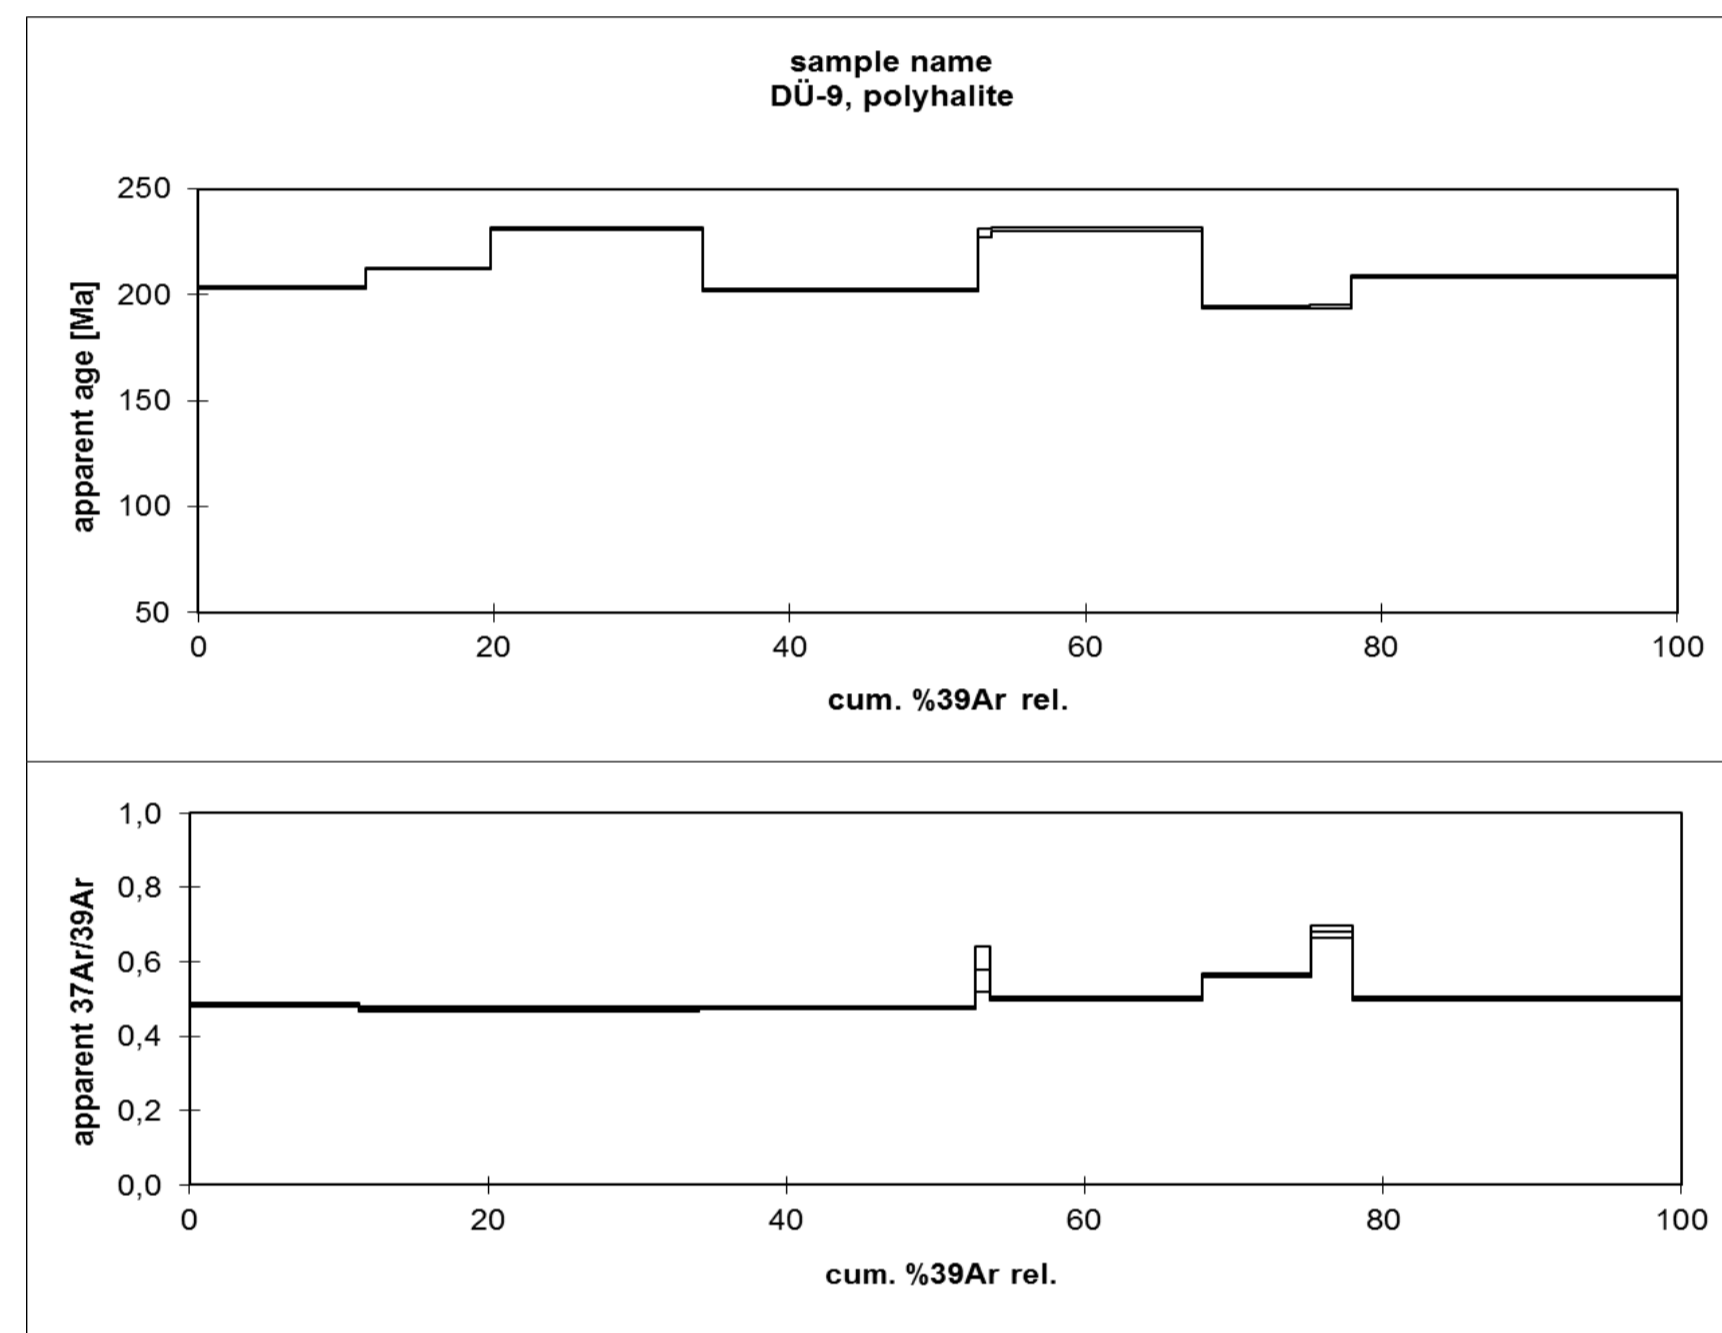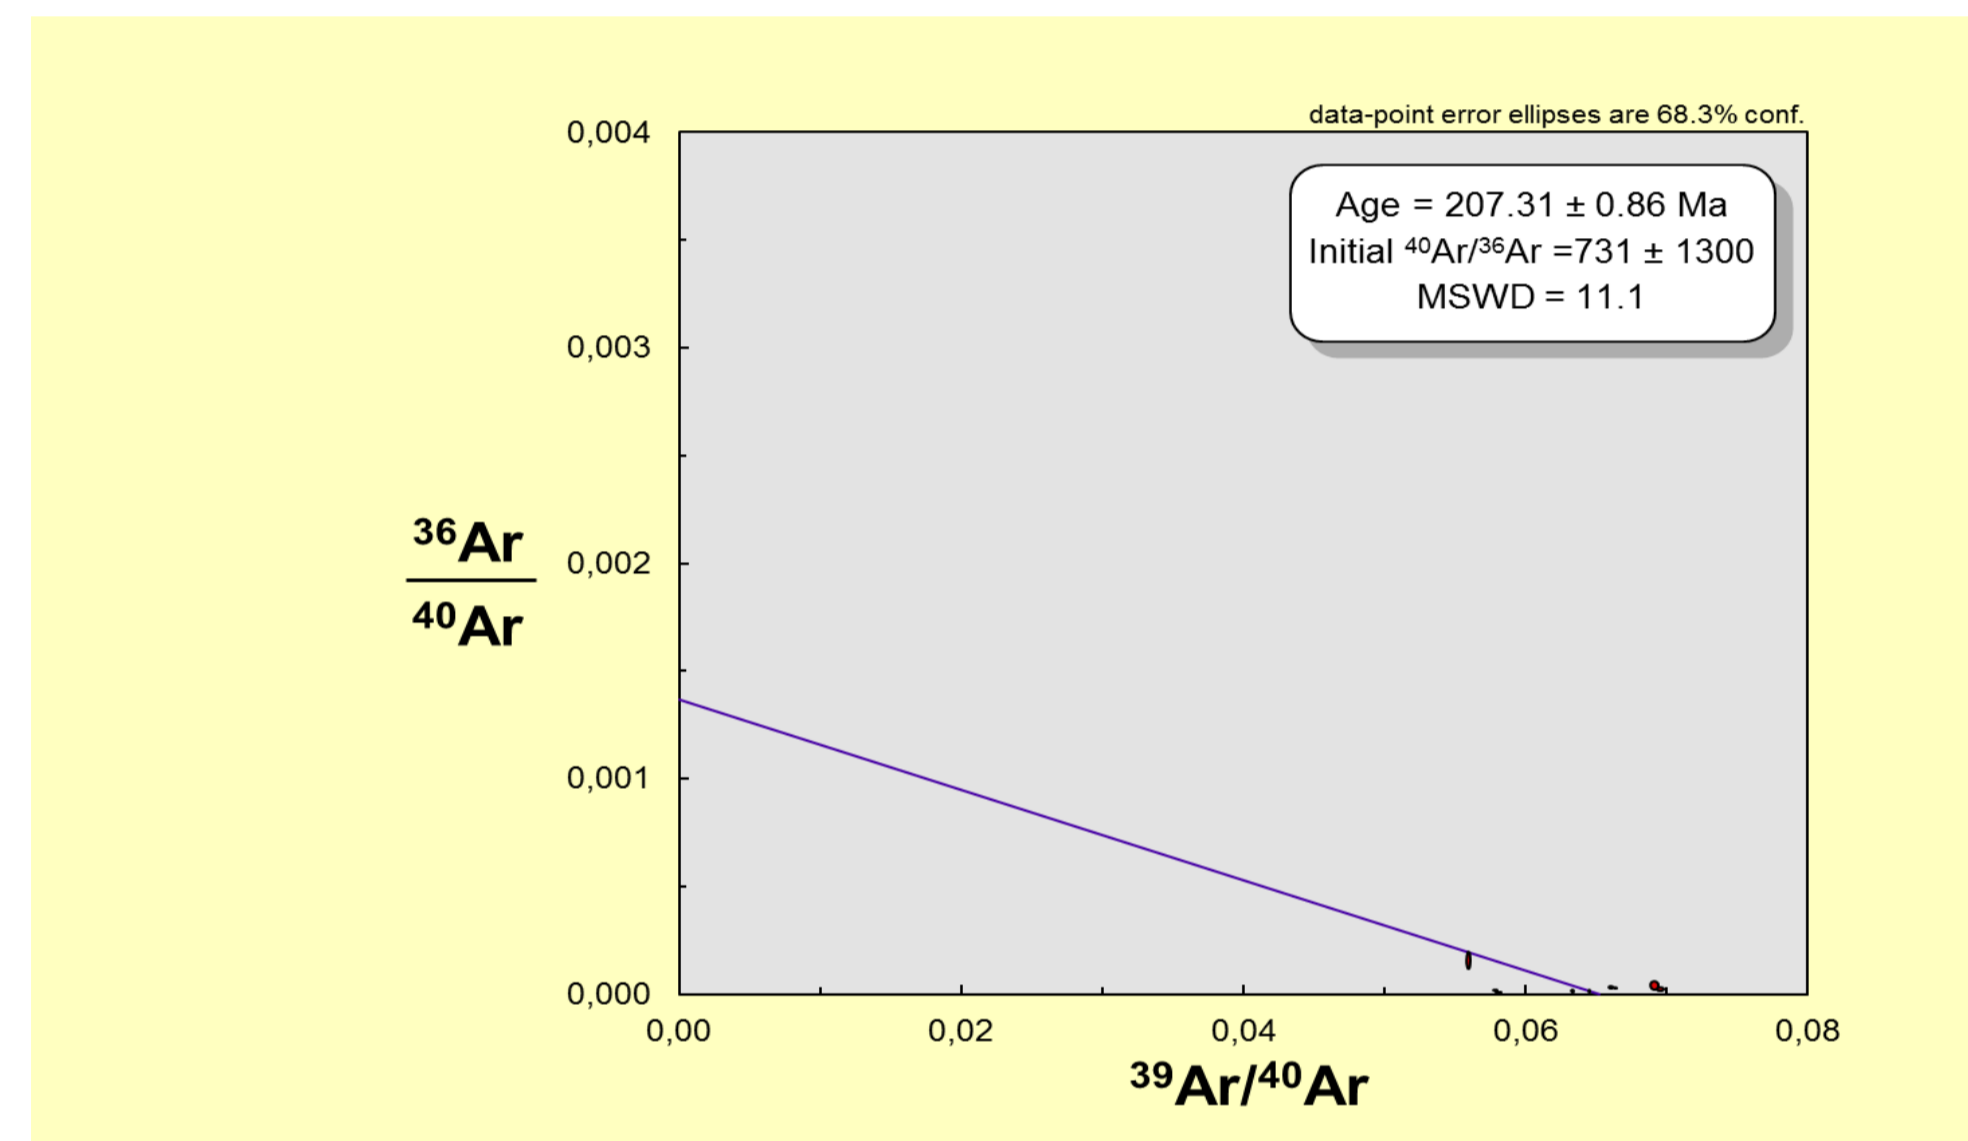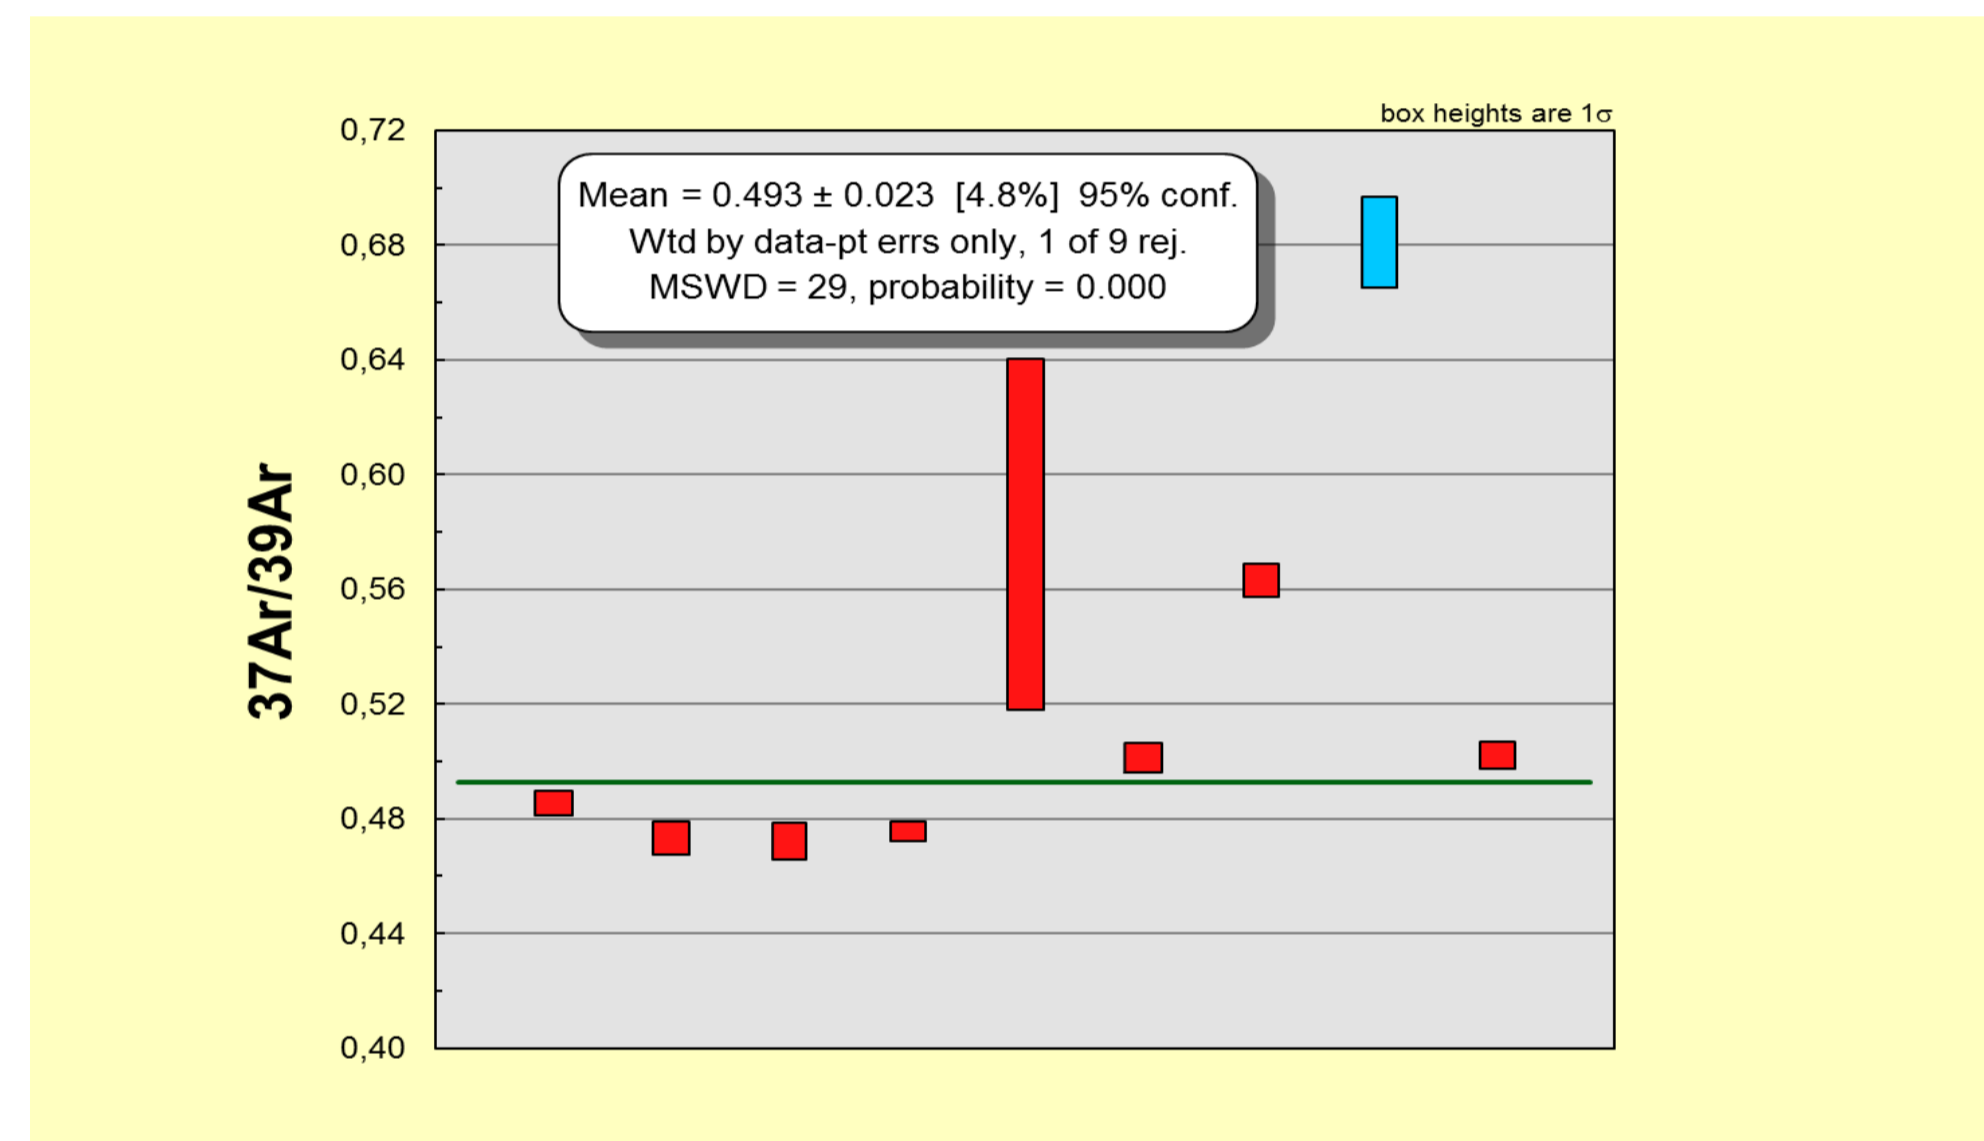

Supplement: Supplementary file 11 [file 1]
