# Supplementary material
Source: publisher figshare collection journal article supplement (https://geolsoc.figshare.com/articles/dataset/_/3453197)

**5.2425E-06 1.8727E-11**

sample field number ..... B0G-02  
 project description ..... FWF P22-728  
 number of measurement ..... 090018  
 number of irradiation ..... 25-145  
 value of irradiation ..... 0.007917 0.000018  
 duration of irradiation [h] ..... 16.0  
 year of irradiation ..... 2008  
 julian day of irradiation ..... 346

material: Polyhallt  
 grain size: 200-250 µm  
 number: 1  
 notes: Berchtesgarden mine  
 (+/- 1sigma)

conversion from [V] to [cps] by: 6E+07  
 composition of atmospheric argon: (40Ar/36Ar)atm. = 295.5 +/- 1sigma  
 half-life of 37Ar [d] = 35.1 (Steiger & Jäger 1977)  
 decay constant of 37Ar [dE-01] = 1.975E-02 (Stoerner et al. 1965)  
 decay constant of 39Ar [dE-01] = 7.264E-06 (Stoerner et al. 1965)  
 decay constant of 40K [dE-01] = 5.543E-10 (Steiger & Jäger 1977)  
 correction for Ca-derived Ar: (36Ar/37Ar)Ca = 2.250E-04 Measured  
 correction for Ca-derived Ar: (39Ar/37Ar)Ca = 6.140E-04 Measured  
 correction for K-derived Ar: (40Ar/39Ar)K = 2.660E-02 Measured  
 correction for K-derived Ar: (38Ar/39Ar)K = 1.170E-02 Measured

| step     | 36Ar        | 37Ar   | 38Ar        | 39Ar   | 40Ar        | date of measurement |             |        |             |        |      |     |
|----------|-------------|--------|-------------|--------|-------------|---------------------|-------------|--------|-------------|--------|------|-----|
| 0900017b | 1.03525E-06 | 5.5934 | 1.11737E-06 | 2.8412 | 9.71900E-07 | 5.0968              | 2.35447E-06 | 6.8639 | 1.20142E-04 | 0.3455 | 2009 | 148 |
| a 3.6%   | 1.1393E-06  | 4.1291 | 1.2206E-06  | 4.1071 | 2.02348E-06 | 2.9439              | 3.43812E-05 | 0.5607 | 4.36966E-04 | 0.2510 | 2009 | 148 |
| b 3.7%   | 1.03525E-06 | 5.5934 | 1.11737E-06 | 2.8412 | 9.71900E-07 | 5.0968              | 2.35447E-06 | 6.8639 | 1.20142E-04 | 0.3455 | 2009 | 148 |
| c 3.8%   | 1.06295E-06 | 2.0779 | 3.2614E-06  | 2.2668 | 7.01715E-06 | 1.6382              | 8.50918E-05 | 0.2859 | 1.00633E-03 | 0.1351 | 2009 | 148 |
| d 3.9%   | 1.18794E-06 | 2.6081 | 1.2509E-05  | 0.7042 | 1.01867E-05 | 1.5932              | 4.86137E-04 | 0.1399 | 4.77554E-03 | 0.0625 | 2009 | 148 |
| e 4.1%   | 1.02201E-06 | 3.9155 | 1.0451E-06  | 4.7589 | 1.05524E-06 | 6.0746              | 2.32642E-06 | 4.3037 | 1.19959E-04 | 0.5573 | 2009 | 148 |
| f 4.3%   | 8.41973E-07 | 3.9155 | 1.0451E-06  | 4.7589 | 1.05524E-06 | 6.0746              | 2.32642E-06 | 4.3037 | 1.19959E-04 | 0.5573 | 2009 | 148 |
| g 4.6%   | 9.63186E-07 | 7.1315 | 1.71350E-05 | 0.6327 | 1.32410E-05 | 1.3193              | 7.89420E-04 | 0.1517 | 7.71773E-03 | 0.0724 | 2009 | 153 |
| h 4.9%   | 1.12748E-06 | 4.4038 | 9.70551E-06 | 0.5956 | 3.99478E-06 | 1.5919              | 6.84616E-05 | 0.2318 | 1.36275E-03 | 0.1024 | 2009 | 153 |
| i 5.2%   | 8.32665E-07 | 3.0695 | 9.49038E-07 | 6.3056 | 8.40107E-07 | 4.5915              | 3.17062E-06 | 1.9897 | 1.11427E-04 | 0.6850 | 2009 | 153 |
| j 5.3%   | 1.21044E-06 | 2.1125 | 5.2201E-05  | 0.5709 | 7.67091E-06 | 1.9406              | 9.88648E-05 | 0.2359 | 1.43153E-03 | 0.0863 | 2009 | 153 |
| k 6.3%   | 2.60323E-06 | 2.6729 | 1.55975E-04 | 0.3585 | 1.75200E-05 | 1.1711              | 4.72818E-05 | 0.5934 | 9.26670E-04 | 0.1700 | 2009 | 154 |
| l 6.3%   | 1.17850E-05 | 1.0368 | 6.25003E-04 | 0.1900 | 4.16305E-05 | 0.6793              | 1.91645E-04 | 0.4635 | 4.59962E-03 | 0.2356 | 2009 | 154 |

| blank- and background-corrected intensities and absolute errors (1-sigma abs.) | 36Ar        | 37Ar     | 38Ar        | 39Ar     | 40Ar        | %39Ar    | cum%39Ar    | %40Ar    | 36Ar/39Ar   | 37Ar/39Ar | 38Ar/39Ar | 40Ar/39Ar | 36Ar/39Ar   | 37Ar/39Ar   | 38Ar/39Ar   | 40Ar/39Ar   | 36Ar/39Ar   | 37Ar/39Ar   | 38Ar/39Ar   | 40Ar/39Ar   | 36Ar/39Ar   | 37Ar/39Ar   | 38Ar/39Ar   | 40Ar/39Ar   | 36Ar/39Ar   | 37Ar/39Ar   | 38Ar/39Ar   | 40Ar/39Ar | age [Ma] | +/- 1sigma [Ma] | +/- 1sigma [Ma] |           |
|--------------------------------------------------------------------------------|-------------|----------|-------------|----------|-------------|----------|-------------|----------|-------------|-----------|-----------|-----------|-------------|-------------|-------------|-------------|-------------|-------------|-------------|-------------|-------------|-------------|-------------|-------------|-------------|-------------|-------------|-----------|----------|-----------------|-----------------|-----------|
| a 3.6%                                                                         | 6.52939E+00 | 4.68E+00 | 3.82409E+01 | 4.88E+00 | 6.58417E+01 | 4.84E+00 | 1.98045E+03 | 1.59E+01 | 1.97707E+04 | 7.32E+01  | 1.55      | 90.57     | 0.002926274 | 0.002351879 | 0.019309    | 0.002457616 | 0.033145    | 0.002458886 | 9.982939    | 0.06997966  | 0.52686284  | 0.069229993 | 1979.809223 | 15.622417   | 1.7852E+04  | 1378.259065 | 9.020174    | 0.699788  | 124.4    | 9.3             | 9.306E+00       |           |
| b 3.7%                                                                         | 1.7895E+00  | 3.87E+00 | 1.37978E+02 | 6.11E+00 | 3.72936E+02 | 6.83E+00 | 4.61648E+03 | 1.82E+01 | 6.53178E+04 | 8.87E+01  | 4.05      | 99.54     | 0.0003339   | 0.000749026 | 0.026696    | 0.000295249 | 0.0173066   | 0.01618993  | 10.711981   | 0.041529997 | 0.22703501  | 0.027148935 | 6162.321952 | 18.219394   | 54925.63174 | 1146.599301 | 10.639715   | 0.225295  | 145.9    | 3.0             | 2.985E+00       |           |
| c 3.8%                                                                         | 9.5312E+00  | 4.10E+00 | 7.10770E+02 | 5.84E+00 | 5.75331E+02 | 1.06E+01 | 3.01987E+04 | 4.36E+01 | 2.90599E+05 | 2.47E+02  | 23.70     | 99.47     | 0.0003316   | 0.000135727 | 0.202536    | 0.000196443 | 0.019052    | 0.00035189  | 9.622915    | 0.016136818 | 0.640984958 | 0.005348872 | 30186.77467 | 43.635748   | 288266.676  | 1236.217687 | 9.549436    | 0.043216  | 131.5    | 0.6             | 6.840E-01       |           |
| d 3.9%                                                                         | 2.02741E+00 | 3.48E+00 | 2.27871E+01 | 4.95E+00 | 1.16811E+01 | 5.61E+00 | 7.75916E+02 | 1.37E+01 | 8.68988E+03 | 6.96E+01  | 0.61      | 29.31     | 0.002671    | 0.004460263 | 0.025368    | 0.006403334 | 0.015016    | 0.00746598  | 11.72565    | 0.212628424 | 0.798800294 | 0.174386468 | 775.535196  | 13.867757   | 8077.210725 | 1025.013190 | 10.415013   | 1.334269  | 142.9    | 17.6            | 1.761E+01       |           |
| e 4.1%                                                                         | 6.2297E+00  | 3.35E+00 | 1.98713E+01 | 5.05E+00 | 3.61098E+02 | 4.99E+00 | 6.75111E+02 | 1.04E+01 | 7.78025E+03 | 6.95E+01  | 0.53      | 30.44     | 0.002602    | 0.000746108 | 0.009348    | 0.000389551 | 0.024906    | 0.007389551 | 11.524906   | 0.202333621 | 0.805633279 | 0.204008802 | 674.7771614 | 10.380114   | 595.843275  | 891.193584  | 8.832322    | 1.476218  | 121.9    | 19.7            | 1.976E+01       |           |
| f 4.3%                                                                         | 1.91992E+01 | 4.65E+00 | 3.25984E+02 | 8.27E+00 | 2.01461E+02 | 1.06E+01 | 1.37116E+04 | 1.36E+02 | 1.36457E+05 | 1.38E+02  | 10.76     | 41.20     | 0.001400    | 0.000638781 | 0.023774    | 0.000604827 | 0.014693    | 0.000772788 | 9.951997    | 0.022311637 | 0.714657204 | 0.018184903 | 13705.54517 | 27.540634   | 131071.0159 | 1379.425347 | 9.563357    | 0.102465  | 131.7    | 1.4             | 1.411E+01       |           |
| g 4.6%                                                                         | 2.67655E+01 | 5.19E+00 | 1.01346E+03 | 7.23E+00 | 7.52048E+02 | 1.12E+01 | 4.90883E+04 | 7.52E+01 | 4.73948E+05 | 3.30E+02  | 38.50     | 79.70     | 0.000545    | 0.000105797 | 0.020954    | 0.000150708 | 0.011526    | 0.000262688 | 9.659945    | 0.016428923 | 0.62086496  | 0.004532772 | 48949.59806 | 75.161342   | 466769.6473 | 1573.362143 | 9.516076    | 0.035240  | 131.0    | 0.5             | 5.972E-01       |           |
| h 4.9%                                                                         | 3.7021E+01  | 4.27E+00 | 5.49700E+02 | 4.42E+00 | 1.74875E+02 | 4.82E+00 | 5.31301E+03 | 1.50E+01 | 7.72577E+04 | 9.35E+01  | 4.17      | 83.87     | 0.000968    | 0.000804144 | 0.103461    | 0.000808935 | 0.032914    | 0.000911534 | 14.540887   | 0.044665167 | 3.11042698  | 0.026480862 | 5302.951667 | 14.999196   | 67275.52152 | 1265.635765 | 12.686429   | 0.241349  | 172.7    | 3.2             | 3.170E+01       |           |
| i 5.3%                                                                         | 2.35665E+01 | 2.28E+00 | 3.02024E+03 | 1.90E+01 | 4.39251E+02 | 9.84E+00 | 6.03579E+03 | 1.52E+01 | 8.24034E+04 | 9.06E+01  | 4.74      | 88.61     | 0.000903    | 0.000373969 | 0.530658    | 0.003418427 | 0.072774    | 0.001640723 | 13.652465   | 0.037668844 | 15.95157237 | 0.102767777 | 9976.673366 | 15.227492   | 81684.95107 | 673.974450  | 13.667289   | 0.118021  | 185.4    | 1.8             | 1.808E+01       |           |
| j 5.8%                                                                         | 1.05667E+02 | 5.64E+00 | 9.69426E+03 | 3.51E+01 | 1.02671E+03 | 1.31E+01 | 2.75277E+03 | 1.88E+01 | 6.08944E+04 | 1.03E+02  | 2.16      | 77.26     | 0.003386    | 0.000262824 | 0.312911    | 0.003663275 | 0.312911    | 0.003663275 | 18.488398   | 0.184491919 | 107.694797  | 0.814419169 | 2570.747938 | 18.274831   | 39312.32873 | 1670.950263 | 15.282176   | 0.658669  | 206.2    | 8.4             | 8.412E+00       |           |
| k 6.3%                                                                         | 6.78811E+02 | 8.43E+00 | 3.89471E+04 | 7.03E+01 | 2.53173E+03 | 2.30E+01 | 1.17638E+04 | 5.57E+01 | 2.80046E+05 | 6.77E+02  | 9.23      | 100.00    | 0.057703    | 0.000766901 | 3.310752    | 0.016773913 | 0.215213    | 0.002205643 | 23.805731   | 0.126550622 | 101.5059162 | 0.514279387 | 11000.64094 | 55.740008   | 158556.7339 | 2985.489226 | 14.374209   | 0.245374  | 194.4    | 3.2             | 3.193E+01       |           |
| total                                                                          | 9.17091E+02 | 1.59E+01 | 5.46382E+04 | 8.25E+01 | 6.15965E+03 | 3.65E+01 | 1.27404E+05 | 1.14E+02 | 1.48314E+06 | 8.44E+02  | 100.00    |           | 81.72917933 | 0.007196175 | 0.000124662 | 0.428737    | 0.000763227 | 0.048334    | 0.000289373 | 11.637970   | 0.012363063 | 12.383755   | 0.021756428 | 1.26471E+05 | 114.353067  | 1313712.198 | 4762.907300 | 10.387450 | 0.038810 | 142.6           | 0.6             | 6.516E-01 |

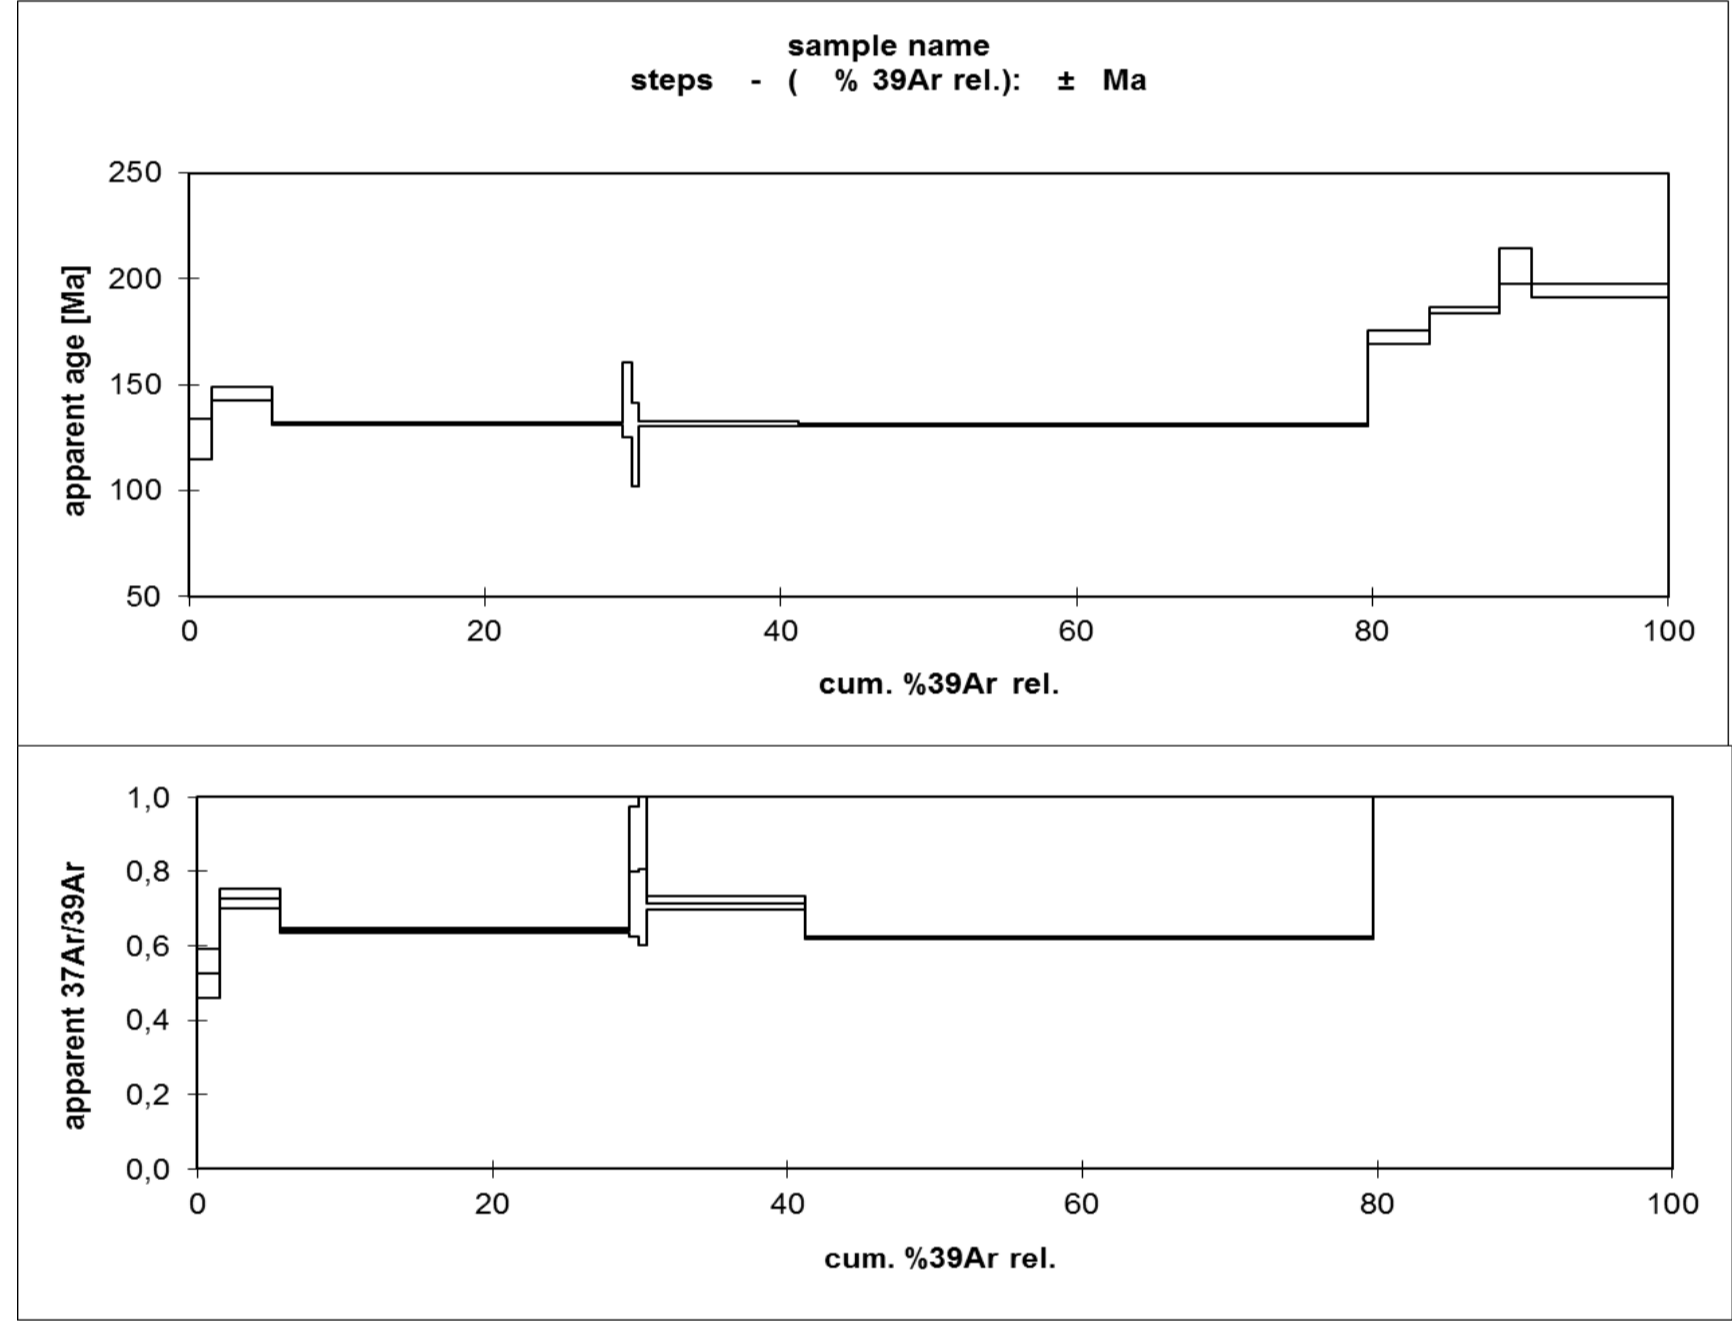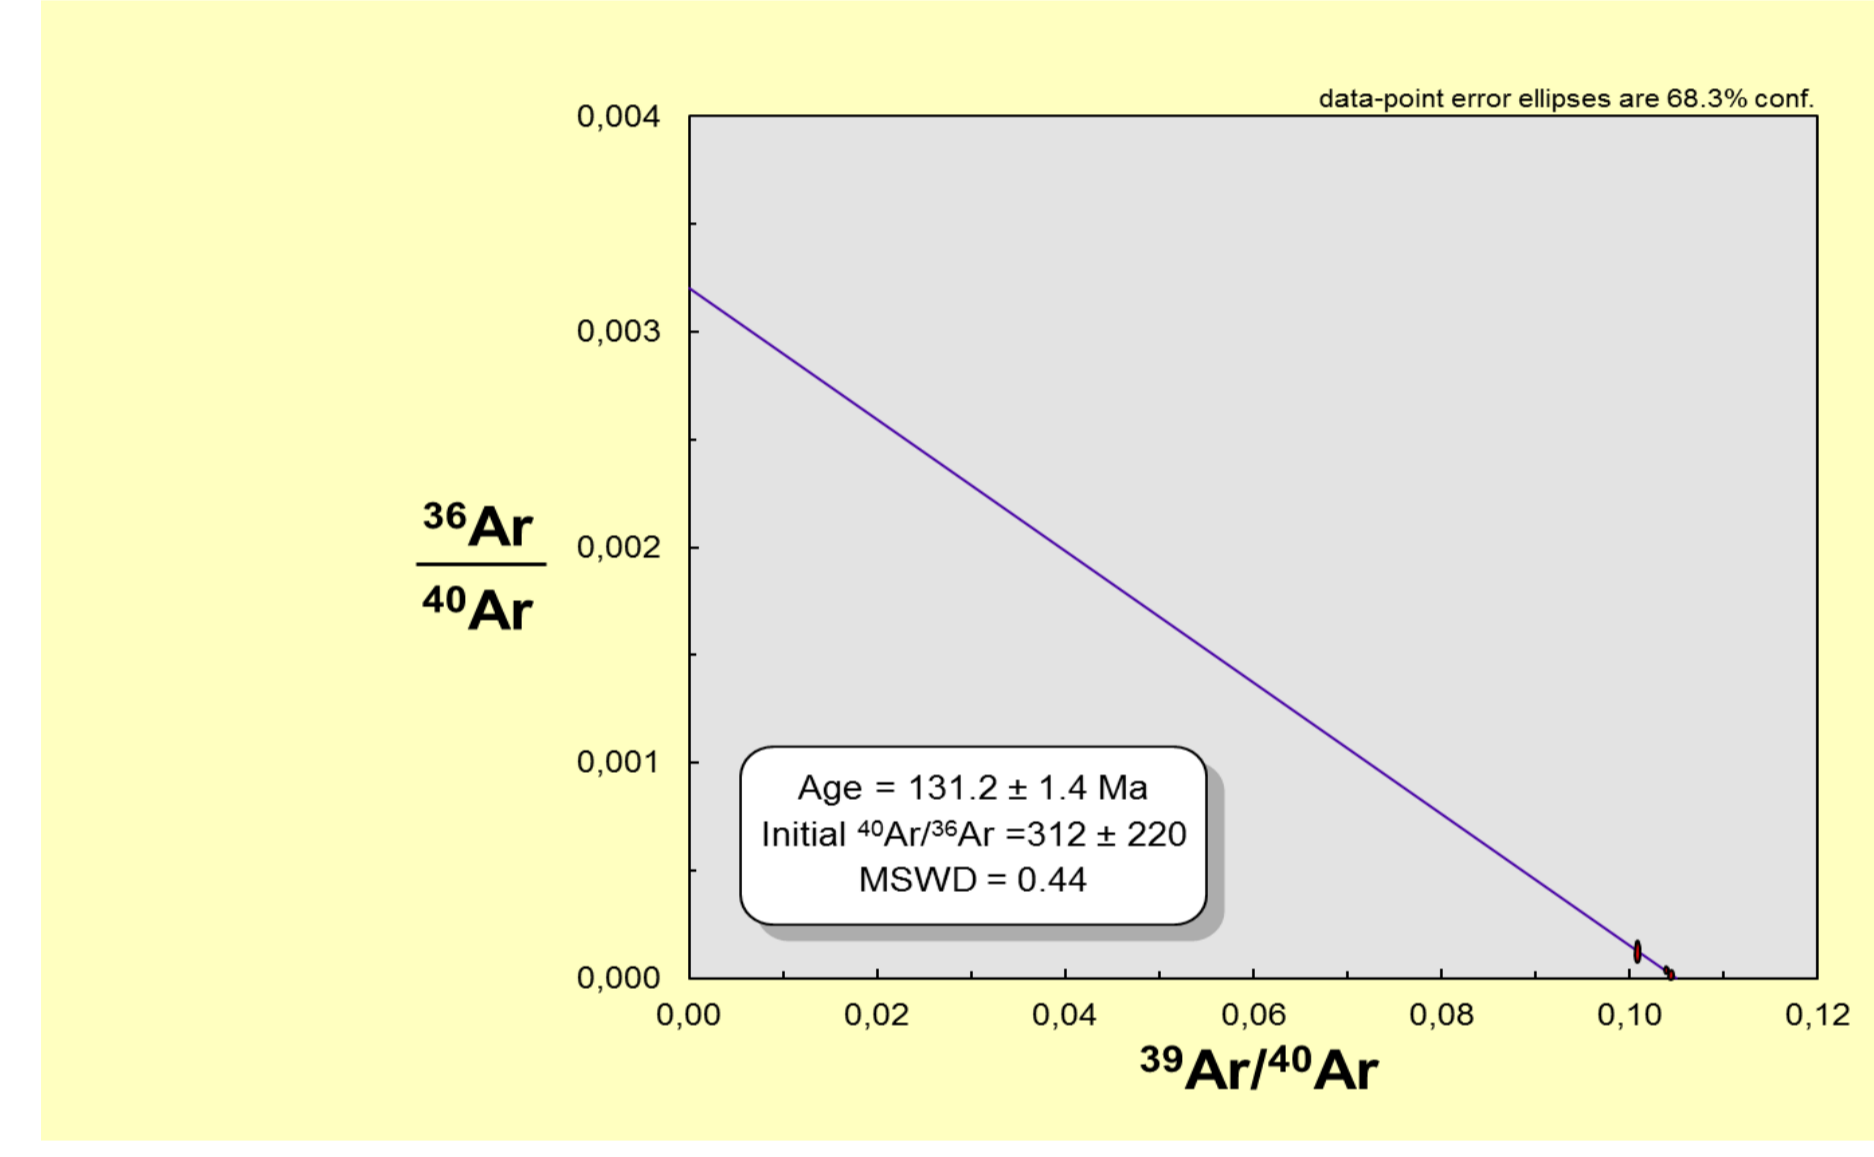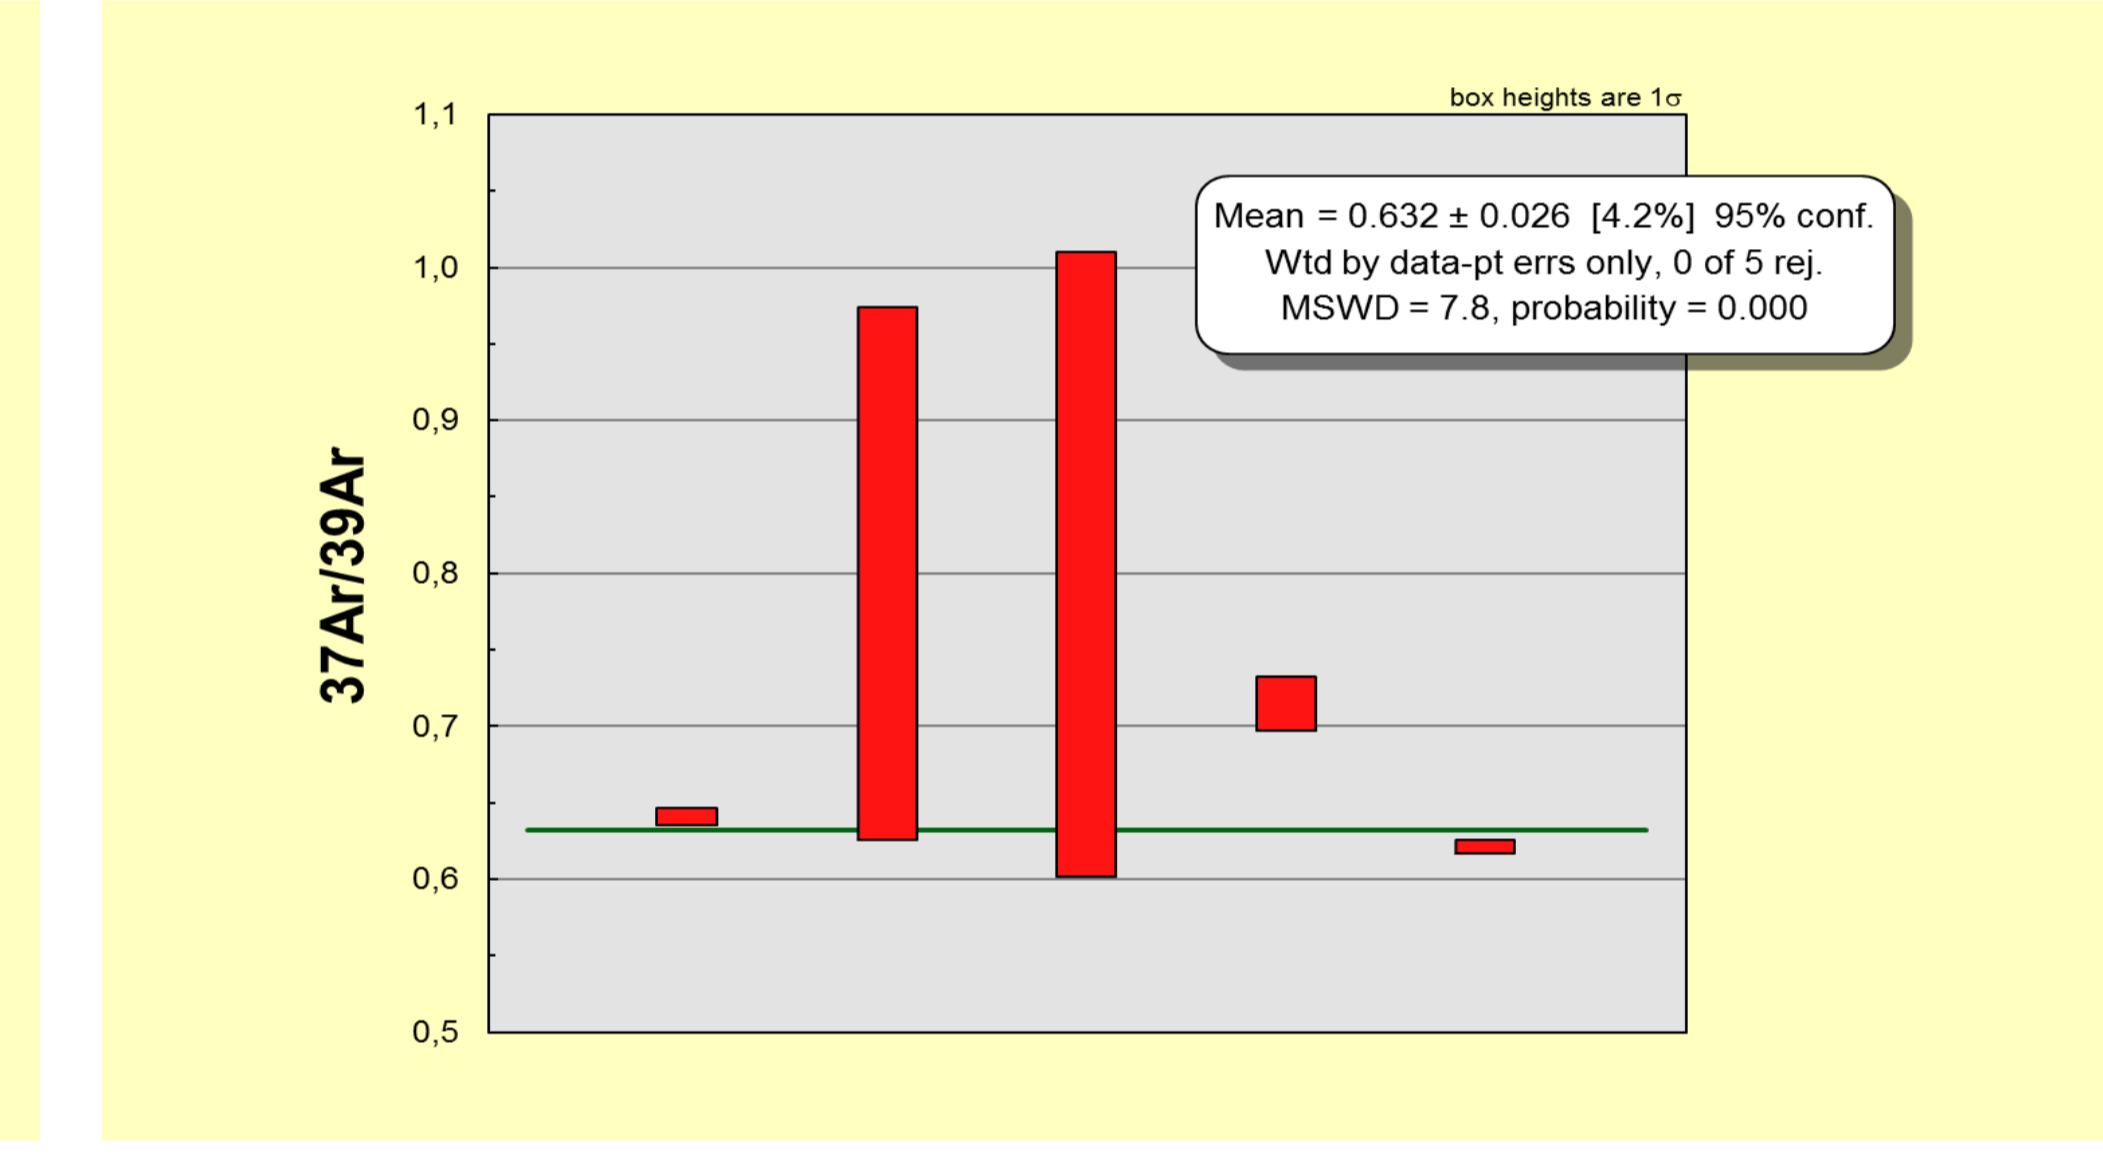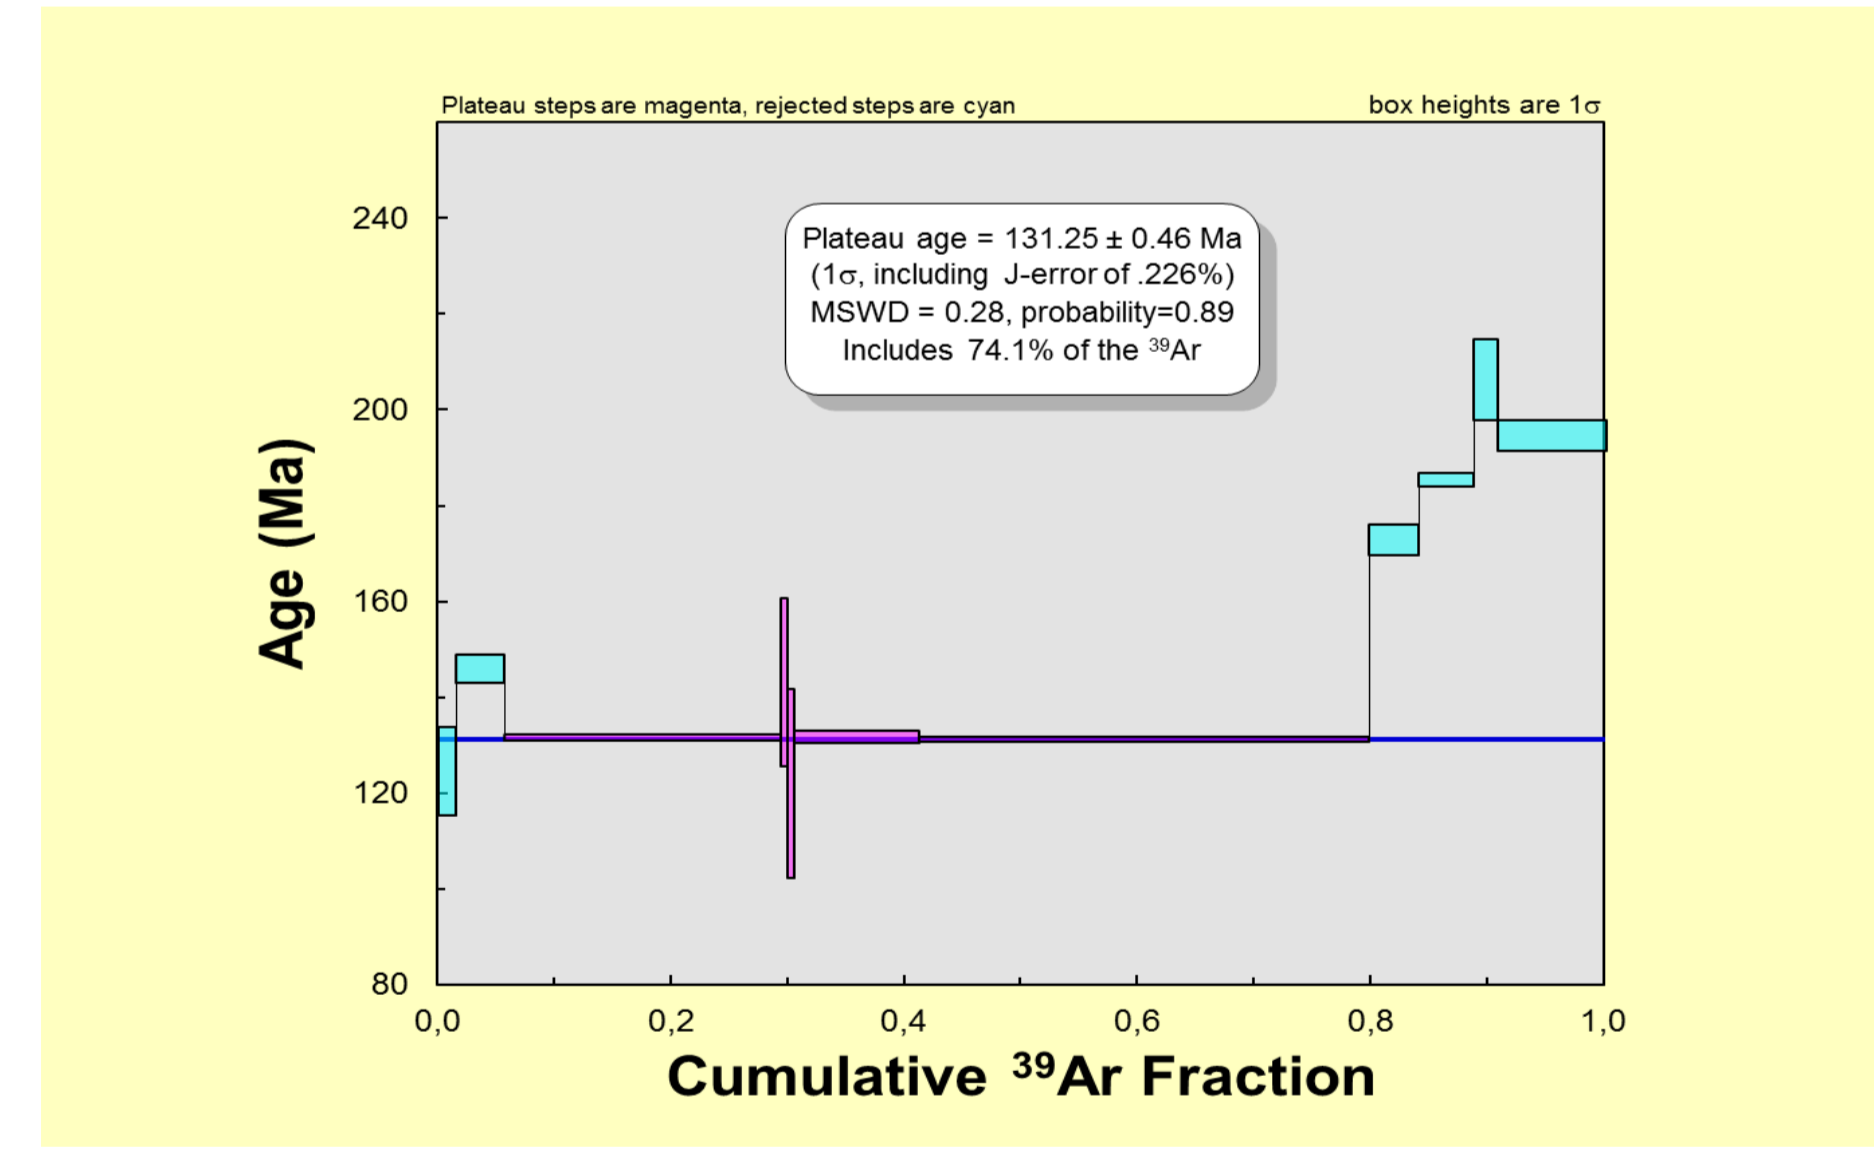

Supplement: Supplementary file 7 [file 1]
