# Supplementary material
Source: publisher figshare collection journal article supplement (https://geolsoc.figshare.com/articles/dataset/_/3453197)

**Project: P22-728**

|                             |             |             |              |
|-----------------------------|-------------|-------------|--------------|
| sample field number         | ALT-13      | material:   | Polyhailt    |
| project description         | PVF P22-728 | grain size: | 200-250 µm   |
| number of measurement       | 0740622m    | number:     | 1            |
| number of irradiation       | 21-90       | notes:      | Altusee mine |
| value of irradiation        | 0.01020     | (± 1sigma)  |              |
| duration of irradiation [h] | 16.0        |             |              |
| year of irradiation         | 2007        |             |              |
| julian day of irradiation   | 157         |             |              |

|                                   |                |   |            |
|-----------------------------------|----------------|---|------------|
| conversion from [V] to [cps] by:  | 6E+07          | ± |            |
| composition of atmospheric argon: | 40Ar/36Ar/jam. | = | 295.5      |
| half-life of 37Ar [d]             |                | = | 35.1       |
| decay constant of 37Ar [dE-01]    |                | = | 1.975E-02  |
| decay constant of 39Ar [dE-01]    |                | = | 7.264E-06  |
| decay constant of 40K [dE-01]     |                | = | 5.543E-10  |
| correction for Ca-derived Ar:     | (36Ar/37Ar)Ca  | = | 2.250E-04  |
| correction for Ca-derived Ar:     | (39Ar/37Ar)Ca  | = | 6.140E-04  |
| correction for K-derived Ar:      | (40Ar/39Ar)K   | = | 2.660E-02  |
| correction for K-derived Ar:      | (38Ar/39Ar)K   | = | 1.1700E-02 |

| 36Ar     | +[%]        | 37Ar   | +[%]        | 38Ar   | +[%]        | 39Ar   | +[%]        | 40Ar   | +[%]        | date of measurement |      |
|----------|-------------|--------|-------------|--------|-------------|--------|-------------|--------|-------------|---------------------|------|
|          |             |        |             |        |             |        |             |        |             | year                | jday |
| 0706022a | 2.86574E-06 | 3.1836 | 4.16194E-06 | 4.0084 | 3.94862E-06 | 2.8238 | 7.64693E-06 | 2.4161 | 1.49439E-04 | 0.7054              | 2007 |
| b 3.0%   | 3.1660E-06  | 3.0460 | 5.4897E-06  | 3.3039 | 6.38617E-06 | 2.3463 | 1.56504E-05 | 2.4871 | 2.56222E-04 | 0.4554              | 2007 |
| c 3.2%   | 3.61804E-06 | 2.0778 | 5.24967E-06 | 1.8328 | 6.04667E-06 | 1.8141 | 1.35177E-05 | 1.8850 | 2.08303E-04 | 0.5963              | 2007 |
| d 3.5%   | 4.13733E-06 | 2.2023 | 5.94969E-06 | 2.9838 | 6.28069E-06 | 1.8662 | 3.98841E-05 | 0.8269 | 4.69881E-04 | 0.6801              | 2007 |
| e 3.7%   | 4.6829E-06  | 2.0778 | 5.24967E-06 | 1.3328 | 6.04667E-06 | 1.1841 | 1.35177E-05 | 1.8850 | 2.08303E-04 | 0.5963              | 2007 |
| f 3.9%   | 5.2305E-06  | 2.2193 | 6.29201E-06 | 2.5430 | 5.49655E-05 | 0.7091 | 4.46247E-03 | 0.0729 | 4.81193E-02 | 0.0285              | 2007 |
| g 4.3%   | 5.84139E-06 | 2.4465 | 6.55897E-06 | 2.8215 | 5.68895E-06 | 1.2447 | 1.22841E-05 | 0.9076 | 2.04436E-04 | 0.4027              | 2007 |
| h 4.3%   | 6.46772E-06 | 2.4465 | 6.55897E-06 | 2.5182 | 2.13395E-05 | 1.7091 | 1.5114E-03  | 0.0999 | 1.73275E-02 | 0.0332              | 2007 |
| i 5.7%   | 7.20540E-06 | 2.4465 | 6.55897E-06 | 2.8215 | 5.68895E-06 | 1.2447 | 1.22841E-05 | 0.9076 | 2.04436E-04 | 0.4027              | 2007 |
| j 5.7%   | 7.88138E-06 | 2.1061 | 5.73964E-06 | 1.6227 | 5.73964E-06 | 2.7388 | 3.92800E-05 | 0.8747 | 5.47573E-04 | 0.2002              | 2007 |

| days elapsed | post-irrad. 37Ar decay factor | number of steps | mean of dec. 37Ar corr. factor |
|--------------|-------------------------------|-----------------|--------------------------------|
| 138          | 1.536E+01                     | 7               | 1.536E+01                      |
| 138          | 1.536E+01                     |                 |                                |

| 36Ar     | +[%]        | 37Ar   | +[%]        | 38Ar   | +[%]        | 39Ar   | +[%]        | 40Ar   | +[%]        | %39Ar  | cum%39Ar | %40Ar  | 36Ar/39Ar                | 36Ar/39Ar                | 37Ar/39Ar                    | 37Ar/39Ar                    | 38Ar/39Ar                    | 38Ar/39Ar                    | 40Ar/39Ar                    | 40Ar/39Ar                    | 37Ar/39Ar                    | 37Ar/39Ar                    | 39ArK                        | 39ArK                        | 40Ar*                        | 40Ar*                        | 40Ar*/39ArK   | 40Ar*/39ArK        | age       | +/- 1sigma | +/- 1sigma |           |           |
|----------|-------------|--------|-------------|--------|-------------|--------|-------------|--------|-------------|--------|----------|--------|--------------------------|--------------------------|------------------------------|------------------------------|------------------------------|------------------------------|------------------------------|------------------------------|------------------------------|------------------------------|------------------------------|------------------------------|------------------------------|------------------------------|---------------|--------------------|-----------|------------|------------|-----------|-----------|
|          |             |        |             |        |             |        |             |        |             |        |          |        | meas. +/- [1-sigma abs.] | meas. +/- [1-sigma abs.] | corrected +/- [1-sigma abs.] | cal cul at ed | +/- [1-sigma abs.] | [Ma]      | +0 [Ma]    |            |           |           |
| 0706022a | 2.86574E-06 | 3.1836 | 4.16194E-06 | 4.0084 | 3.94862E-06 | 2.8238 | 7.64693E-06 | 2.4161 | 1.49439E-04 | 0.7054 | 2007     | 19.53  | 0.007639626              | 0.016721403              | 0.185999                     | 0.03838502                   | 0.360172                     | 0.028604539                  | 13.596906                    | 0.758438837                  | 2.249143626                  | 0.543492051                  | 486.628995                   | 26.897752                    | 1.32333E+03                  | 2451.629679                  | 2.653924      | 4.918816           | 50.1      | 91.7       | 9.186E+01  |           |           |
| b 3.0%   | 3.1660E-06  | 3.0460 | 5.4897E-06  | 3.3039 | 6.38617E-06 | 2.3463 | 1.56504E-05 | 2.4871 | 2.56222E-04 | 0.4554 | 2007     | 18.25  | 0.011017                 | 0.005189266              | 0.031172                     | 0.009119342                  | 0.010416                     | 0.009119342                  | 11.634174                    | 0.263823421                  | 0.47891416                   | 0.14003507                   | 1401.964721                  | 24.463956                    | 1.175740398                  | 2159.69191                   | 8.386267      | 1.547359           | 153.9     | 27.2       | 2.725E+01  |           |           |
| c 3.2%   | 3.61804E-06 | 2.0778 | 5.24967E-06 | 1.8328 | 6.04667E-06 | 1.8141 | 1.35177E-05 | 1.8850 | 2.08303E-04 | 0.5963 | 2007     | 98.55  | 0.000480                 | 0.000118368              | 0.000307                     | 0.000147595                  | 0.009973                     | 0.000231116                  | 9.959688                     | 0.001932076                  | 0.004722243                  | 0.002267069                  | 68160.37621                  | 71.672795                    | 647620.8818                  | 2375.656184                  | 8.788852      | 0.037441           | 178.4     | 1.0        | 1.092E+00  |           |           |
| d 3.5%   | 4.13733E-06 | 2.2023 | 5.94969E-06 | 2.9838 | 6.28069E-06 | 1.8662 | 3.98841E-05 | 0.8269 | 4.69881E-04 | 0.6801 | 2007     | 14.50  | 14.92                    | 96.55                    | 0.000207                     | 0.000527852                  | 0.002870                     | 0.000916862                  | 0.006263                     | 0.000785243                  | 10.529427                    | 0.021742104                  | 0.041007856                  | 0.013988117                  | 15173.6967                   | 26.254181                    | 158469.0978   | 2372.835125        | 10.443733 | 0.157420   | 189.8      | 2.8       | 2.870E+00 |
| e 3.7%   | 4.6829E-06  | 2.0778 | 5.24967E-06 | 1.3328 | 6.04667E-06 | 1.1841 | 1.35177E-05 | 1.8850 | 2.08303E-04 | 0.5963 | 2007     | 60.88  | 79.12                    | 99.41                    | 0.000205                     | 2.82188E-05                  | 0.000234                     | 4.25896E-05                  | 0.010996                     | 9.91398E-05                  | 10.312983                    | 0.008129679                  | 0.003598887                  | 0.00064136                   | 277711.7646                  | 203.689454                   | 2841640.561   | 2458.019688        | 10.232338 | 0.011694   | 186.1      | 0.9       | 9.355E-01 |
| f 3.9%   | 5.2305E-06  | 2.2193 | 6.29201E-06 | 2.5430 | 5.49655E-05 | 0.7091 | 4.46247E-03 | 0.0729 | 4.81193E-02 | 0.0285 | 2007     | 20.51  | 99.63                    | 98.94                    | 0.000411                     | 7.25298E-05                  | 0.000355                     | 0.000146359                  | 0.010441                     | 0.00248094                   | 11.423937                    | 0.012171172                  | 0.005448706                  | 0.002248082                  | 93662.47725                  | 94.489904                    | 1055049.269   | 2037.849626        | 11.276414 | 1.0        | 1.083E+00  |           |           |
| g 4.3%   | 5.84139E-06 | 2.4465 | 6.55897E-06 | 2.8215 | 5.68895E-06 | 1.2447 | 1.22841E-05 | 0.9076 | 2.04436E-04 | 0.4027 | 2007     | 3.33   | 18.25                    | 99.44                    | 0.000207                     | 0.000527852                  | 0.002870                     | 0.000916862                  | 0.006263                     | 0.000785243                  | 10.529427                    | 0.021742104                  | 0.041007856                  | 0.013988117                  | 15173.6967                   | 26.254181                    | 158469.0978   | 2372.835125        | 10.443733 | 0.157420   | 189.8      | 2.8       | 2.870E+00 |
| h 4.3%   | 6.46772E-06 | 2.4465 | 6.55897E-06 | 2.5182 | 2.13395E-05 | 1.7091 | 1.5114E-03  | 0.0999 | 1.73275E-02 | 0.0332 | 2007     | 0.37   | 100.00                   | 95.84                    | 0.001816                     | 0.004269434                  | 0.008434                     | 0.000676594                  | 0.001843                     | 0.006468434                  | 12.701298                    | 0.177219422                  | 0.129545394                  | 0.103950522                  | 1686.251631                  | 22.544736                    | 20484.19785   | 2129.491292        | 12.147771 | 1.273256   | 218.9      | 21.6      | 2.163E+01 |
| i 5.7%   | 7.20540E-06 | 2.4465 | 6.55897E-06 | 2.8215 | 5.68895E-06 | 1.2447 | 1.22841E-05 | 0.9076 | 2.04436E-04 | 0.4027 | 2007     | 100.00 | 98.96418369              | 0.000386655              | 4.41875E-05                  | 0.000657                     | 7.59088E-05                  | 0.010930                     | 9.81007E-05                  | 10.517081                    | 0.000690157                  | 0.010098                     | 0.001165964                  | 4.56195E+05                  | 240.584963                   | 4736344.737                  | 6056.247550   | 10.382279          | 0.014364  | 188.7      | 0.9        | 9.585E-01 |           |

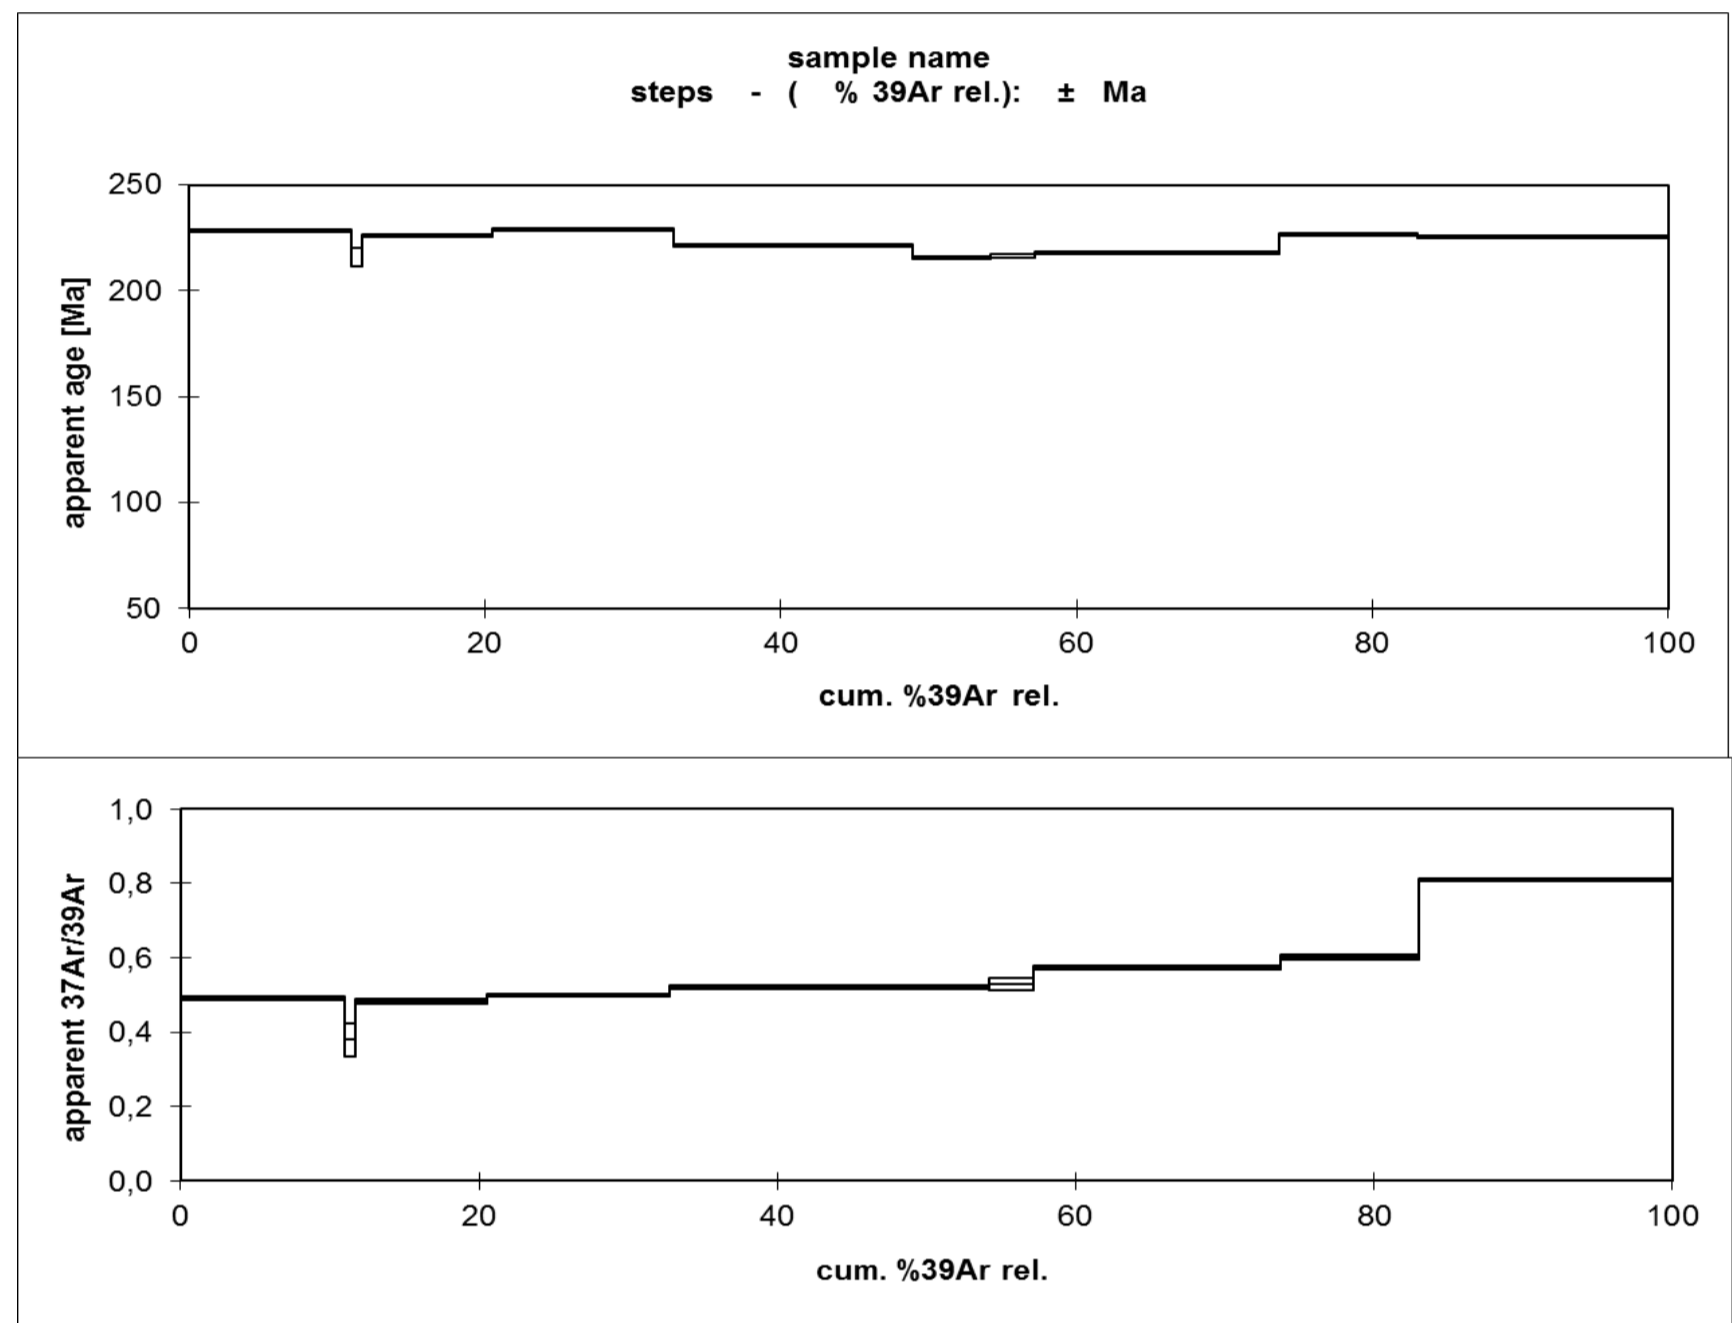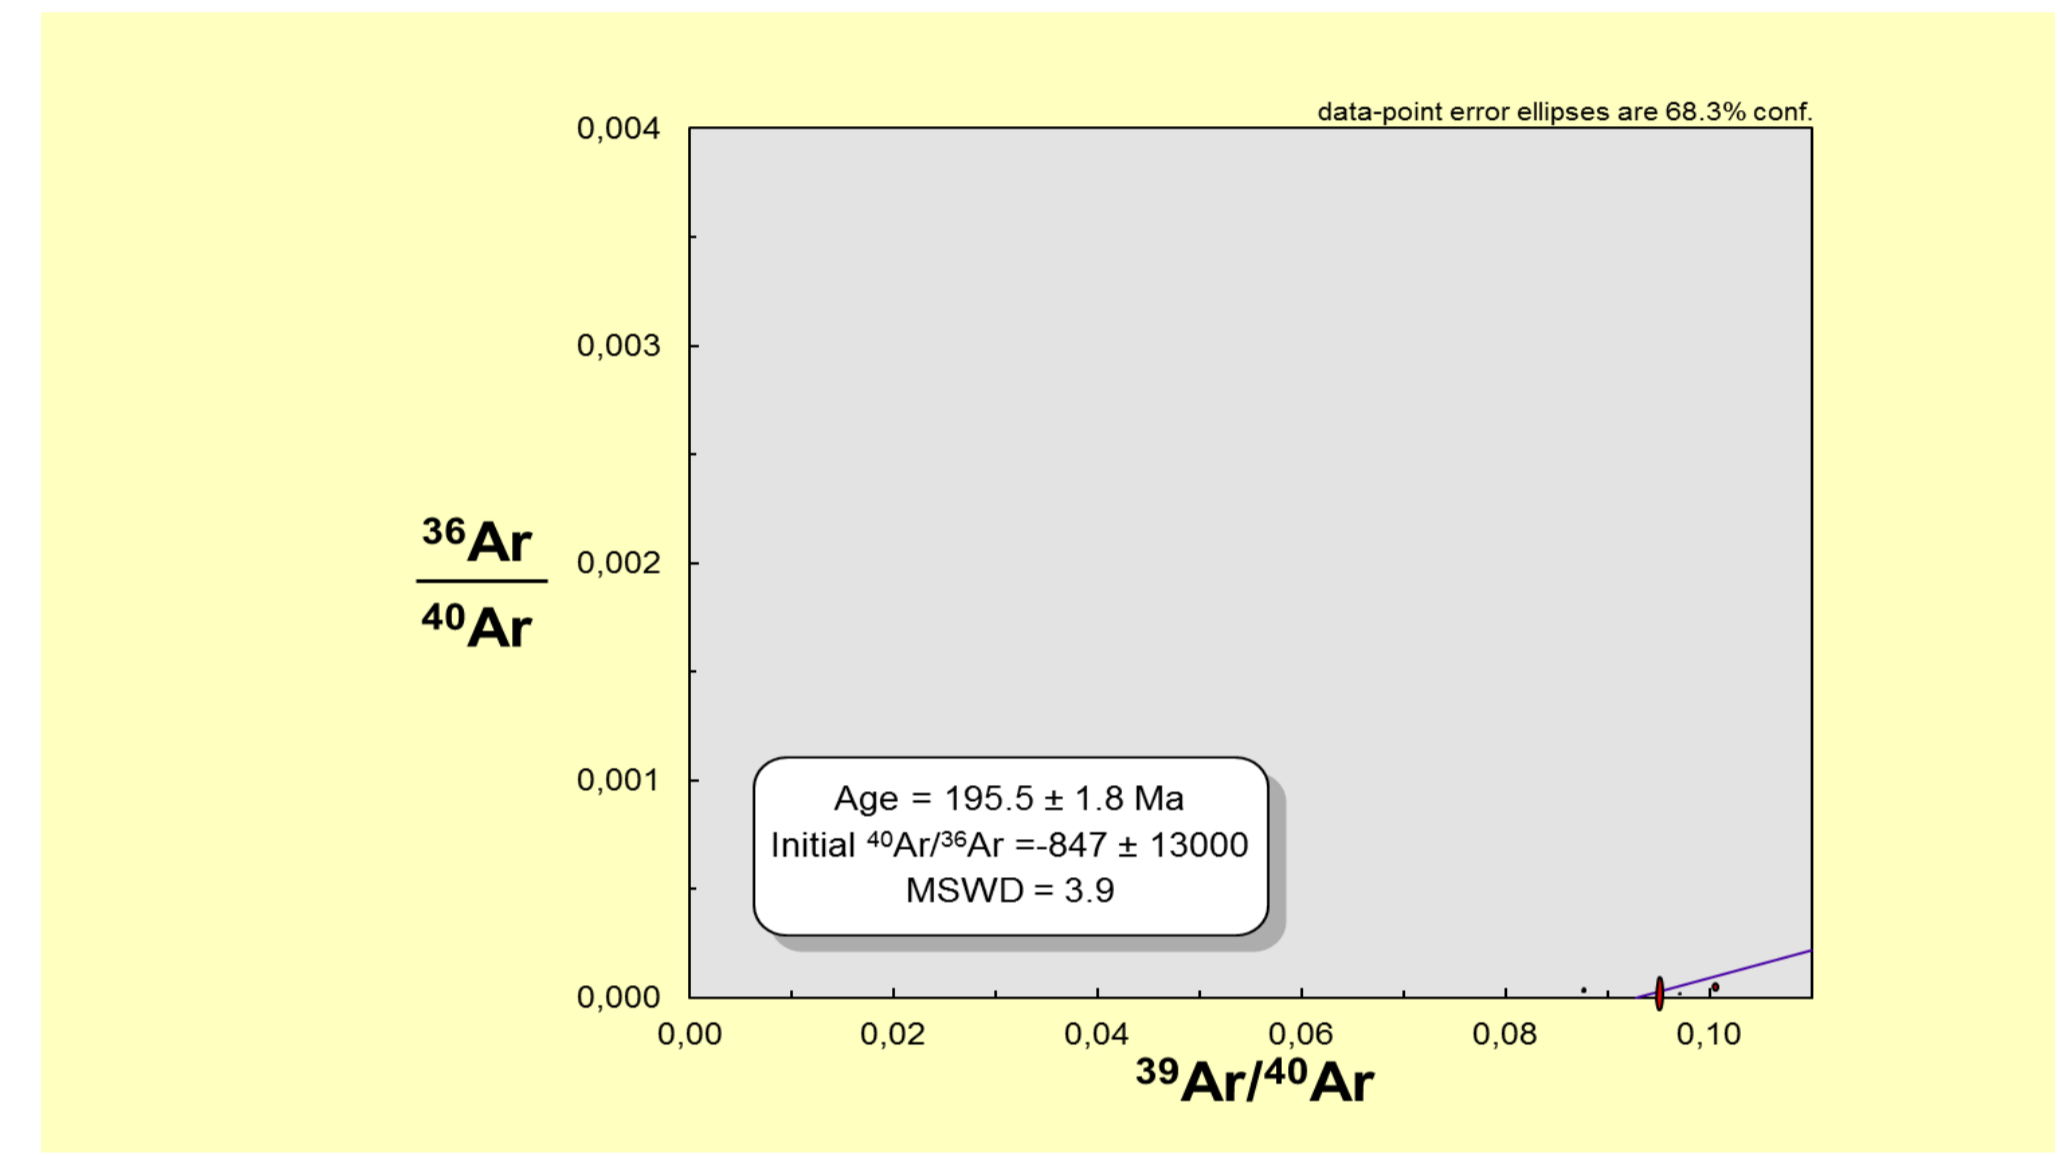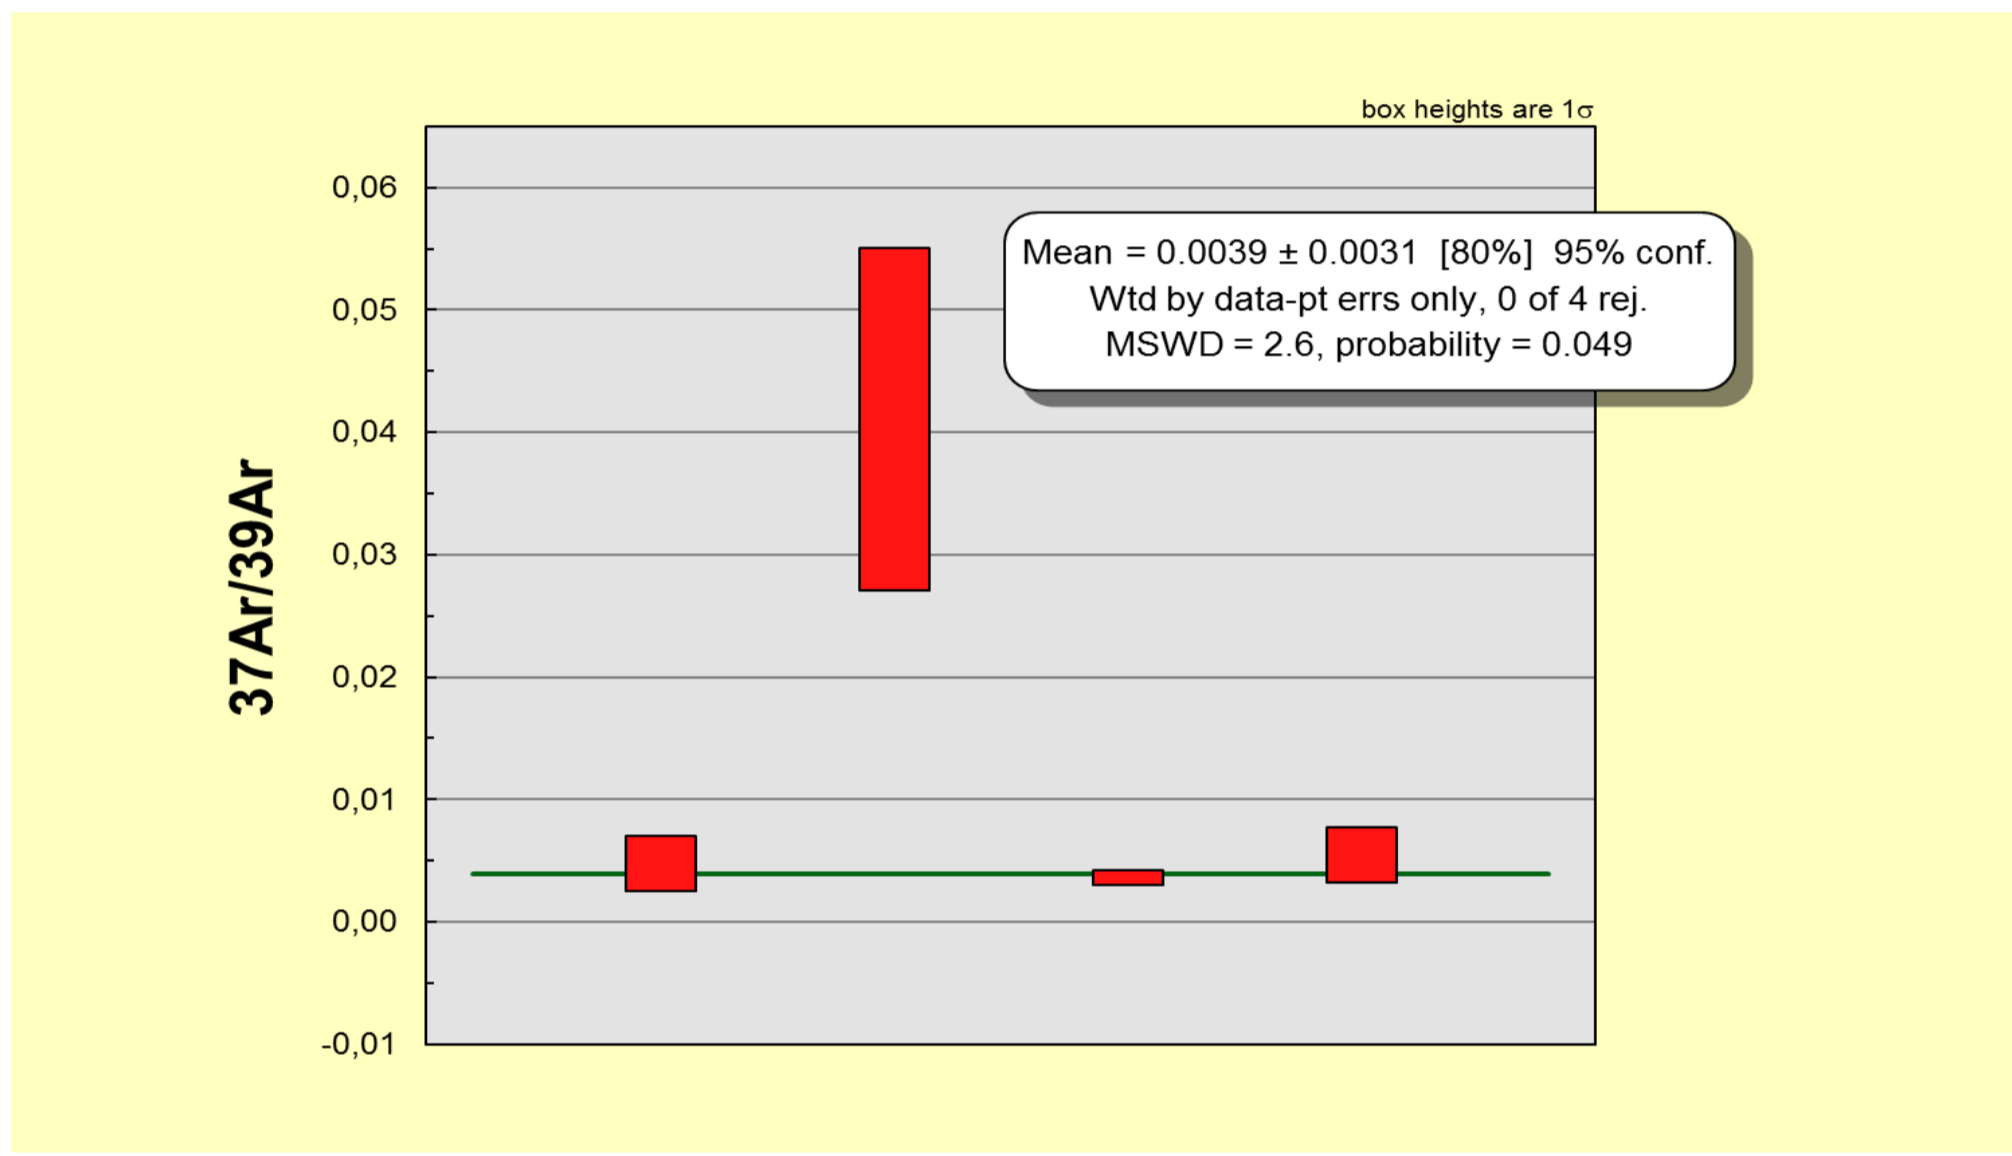

Supplement: Supplementary file 6 [file 1]
