# Supplementary material
Source: publisher figshare collection journal article supplement (https://geolsoc.figshare.com/articles/dataset/_/3453197)

**Sample: B0G-B4**

sample field number ..... B0G-B4  
 project description ..... FVIF P22-728  
 number of measurement ..... 090662  
 number of irradiation ..... 25-146  
 J-value of irradiation ..... 0.007930  
 duration of irradiation [h] ..... 16.0  
 year of irradiation ..... 2008  
 julian day of irradiation ..... 346

material: Polyhailt  
 grain size: 200-250 µm  
 number: 8  
 notes: Berchtesgarden mine  
 (+/- 1sigma)

conversion from [V] to [eps] by: 6E+07  
 composition of atmospheric argon: (40Ar/36Ar)atm. = 295.5  
 half-life of 37Ar [d] = 35.1  
 decay constant of 37Ar [dE-01] = 1.975E-02  
 decay constant of 39Ar [dE-1] = 7.264E-06  
 decay constant of 40K [dE-01] = 5.543E-10  
 correction for Ca-derived Ar: (36Ar/37Ar)Ca = 2.250E-04  
 correction for Ca-derived Ar: (39Ar/37Ar)Ca = 6.140E-04  
 correction for K-derived Ar: (40Ar/39Ar)K = 2.660E-02  
 correction for K-derived Ar: (38Ar/39Ar)K = 1.170E-02

+/-  
 1sigma  
 (Steiger & Jäger 1977)  
 (Steinmeyer et al. 1965)  
 (Steinmeyer et al. 1965)  
 (Steiger & Jäger 1977)  
 Measured  
 Measured  
 Measured

| step        | 36Ar        |             | 37Ar        |             | 38Ar        |             | 39Ar        |             | 40Ar        |        | date of measurement |       |
|-------------|-------------|-------------|-------------|-------------|-------------|-------------|-------------|-------------|-------------|--------|---------------------|-------|
|             | intensity   | +/-[%]      | intensity   | +/-[%]      | intensity   | +/-[%]      | intensity   | +/-[%]      | intensity   | +/-[%] | year                | j-day |
| 090662b     | 9.32640E-07 | 5.0190      | 1.25459E-06 | 4.7609      | 1.41729E-06 | 4.7609      | 5.67354E-06 | 2.4733      | 1.42981E-04 | 0.4927 | 2009                | 169   |
| a 3.5%      | 1.07238E-06 | 6.1218      | 3.98934E-06 | 1.5654      | 6.21974E-06 | 1.9056      | 2.04097E-04 | 0.1806      | 2.87521E-03 | 0.0729 | 2009                | 169   |
| 090662b     | 1.12492E-06 | 3.2603      | 9.22000E-07 | 4.6504      | 9.59613E-07 | 6.8352      | 2.13120E-06 | 4.5325      | 1.06199E-04 | 0.6300 | 2009                | 170   |
| d 3.9%      | 1.15549E-06 | 2.7913      | 2.85016E-06 | 1.9766      | 9.71591E-06 | 1.5298      | 4.87375E-06 | 0.6842      | 6.96903E-04 | 0.2539 | 2009                | 170   |
| 1.1494E-06  | 3.2603      | 9.22000E-07 | 4.6504      | 9.59613E-07 | 6.8352      | 2.13120E-06 | 4.5325      | 1.06199E-04 | 0.6300      | 2009   | 170                 |       |
| e 4.1%      | 1.13500E-06 | 4.9853      | 1.49052E-06 | 2.9816      | 1.33231E-06 | 5.0660      | 8.77199E-06 | 1.7689      | 1.90024E-04 | 0.5265 | 2009                | 170   |
| 090662c     | 1.12492E-06 | 3.2603      | 9.22000E-07 | 4.6507      | 1.22579E-06 | 6.8138      | 2.97407E-06 | 4.4901      | 2.63774E-04 | 0.1961 | 2009                | 170   |
| f 4.5%      | 1.21772E-06 | 4.1685      | 7.00283E-06 | 1.5899      | 8.73212E-06 | 1.6319      | 6.85076E-06 | 0.4159      | 9.74093E-04 | 0.1292 | 2009                | 170   |
| 1.12492E-06 | 3.2603      | 9.22000E-07 | 4.6507      | 1.22579E-06 | 6.8138      | 2.97407E-06 | 4.4901      | 2.63774E-04 | 0.1961      | 2009   | 170                 |       |
| g 5.0%      | 2.17034E-06 | 2.7025      | 9.81594E-05 | 0.3153      | 1.51167E-05 | 1.2134      | 4.70033E-05 | 0.5841      | 8.12745E-04 | 0.1598 | 2009                | 170   |

| days elapsed | post-irrad. 37Ar decay factor | number of steps | mean of dec. 37Ar corr. factor |
|--------------|-------------------------------|-----------------|--------------------------------|
| 188          | 4.123E+01                     | 5               | 4.189E+01                      |
| 189          | 4.205E+01                     |                 |                                |
| 189          | 4.205E+01                     |                 |                                |
| 189          | 4.205E+01                     |                 |                                |

blank- and background-corrected intensities and absolute errors (1-sigma abs.):

|        | 36Ar        | 37Ar     | 38Ar        | 39Ar     | 40Ar        | %39Ar    | cum%39Ar    | %40Ar    | 36Ar/38Ar   | 36Ar/39Ar | 37Ar/39Ar | 37Ar/38Ar   | 38Ar/39Ar   | 38Ar/36Ar   | 40Ar/38Ar   | 40Ar/39Ar  | 37Ar/39Ar   | 37Ar/38Ar   | 39ArK       | 39ArK       | 40Ar        | 40Ar        | 40Ar/39ArK  | 40Ar/39ArK  | age         | +/- 1sigma  | +/- 19igma  |           |          |       |           |           |
|--------|-------------|----------|-------------|----------|-------------|----------|-------------|----------|-------------|-----------|-----------|-------------|-------------|-------------|-------------|------------|-------------|-------------|-------------|-------------|-------------|-------------|-------------|-------------|-------------|-------------|-------------|-----------|----------|-------|-----------|-----------|
| a 3.5% | 8.72288E+00 | 5.03E+00 | 1.70453E+02 | 5.39E+00 | 2.99778E+02 | 8.51E+00 | 1.24422E+04 | 2.47E+01 | 1.70551E+05 | 1.38E+02  | 55.03     | 55.03       | 98.76       | 0.000701072 | 0.000404516 | 0.013700   | 0.000434162 | 0.024094    | 0.000689963 | 13.707513   | 0.029401164 | 0.564829878 | 0.017900371 | 12437.84853 | 24.714825   | 1.68110E+05 | 1493.721622 | 13.515998 | 0.123061 | 183.7 | 1.6       | 1.669E+00 |
| d 3.9% | 1.90824E+00 | 3.0E+00  | 1.20673E+02 | 4.42E+00 | 2.90014E+03 | 1.01E+01 | 2.90014E+03 | 2.17E+01 | 3.68723E+04 | 1.91E+02  | 12.87     | 67.89       | 99.38       | 0.000666    | 0.001047896 | 0.041481   | 0.001551865 | 0.167885    | 0.002758456 | 12.674613   | 0.102765773 | 1.744339773 | 0.065258985 | 2906.029055 | 21.670070   | 36568.49253 | 938.680022  | 12.583664 | 0.326465 | 171.6 | 4.3       | 4.274E+00 |
| e 4.1% | 6.29213E-01 | 4.21E+00 | 3.54981E+01 | 3.85E+00 | 2.33695E+01 | 5.97E+00 | 4.14494E+02 | 1.14E+01 | 6.23914E+03 | 7.51E+01  | 1.93      | 69.73       | 98.34       | 0.001516    | 0.010154972 | 0.068519   | 0.009993837 | 0.059127    | 0.014257613 | 12.637440   | 0.39212268  | 3.600407312 | 0.403439794 | 413.5774571 | 11.400259   | 5140.429459 | 1246.100093 | 12.429180 | 3.032426 | 169.6 | 39.5      | 3.956E+01 |
| f 4.5% | 5.79278E+00 | 3.91E+00 | 3.75753E+02 | 7.48E+00 | 4.68660E+02 | 1.03E+01 | 4.09635E+03 | 1.97E+01 | 4.43395E+04 | 8.49E+01  | 18.12     | 87.84       | 98.51       | 0.001414    | 0.000954315 | 0.091729   | 0.001877801 | 0.114385    | 0.002576172 | 10.824151   | 0.055942154 | 3.857372905 | 0.078965255 | 4098.648281 | 19.664088   | 43569.62694 | 1158.448958 | 10.661457 | 0.288076 | 146.4 | 3.8       | 3.822E+00 |
| g 5.0% | 6.52572E-01 | 4.32E+00 | 6.06959E+03 | 1.95E+01 | 8.67223E+02 | 1.26E+01 | 2.74652E+03 | 1.91E+01 | 3.42079E+04 | 8.73E+01  | 12.16     | 100.00      | 93.21       | 0.023743    | 0.001579672 | 2.206982   | 0.016970112 | 0.315524    | 0.005073801 | 12.467764   | 0.050296792 | 92.80795011 | 0.709421512 | 2591.894557 | 19.064760   | 31875.31993 | 1280.749725 | 12.298077 | 0.502119 | 167.9 | 6.6       | 6.962E+00 |
| total  | 8.23102E+01 | 9.28E+00 | 6.76926E+03 | 2.24E+01 | 2.20641E+03 | 2.18E+01 | 2.20107E+04 | 4.43E+01 | 2.91269E+05 | 2.31E+02  | 100.00    | 91.64940261 | 0.009640327 | 0.000410648 | 0.269341    | 0.00114984 | 0.097539    | 0.000982117 | 12.881924   | 0.027219514 | 12.339637   | 0.048163958 | 2.43662E+04 | 44.280371   | 285199.0942 | 2755.072790 | 12.711336   | 0.128330  | 173.3    | 1.7   | 1.698E+00 |           |

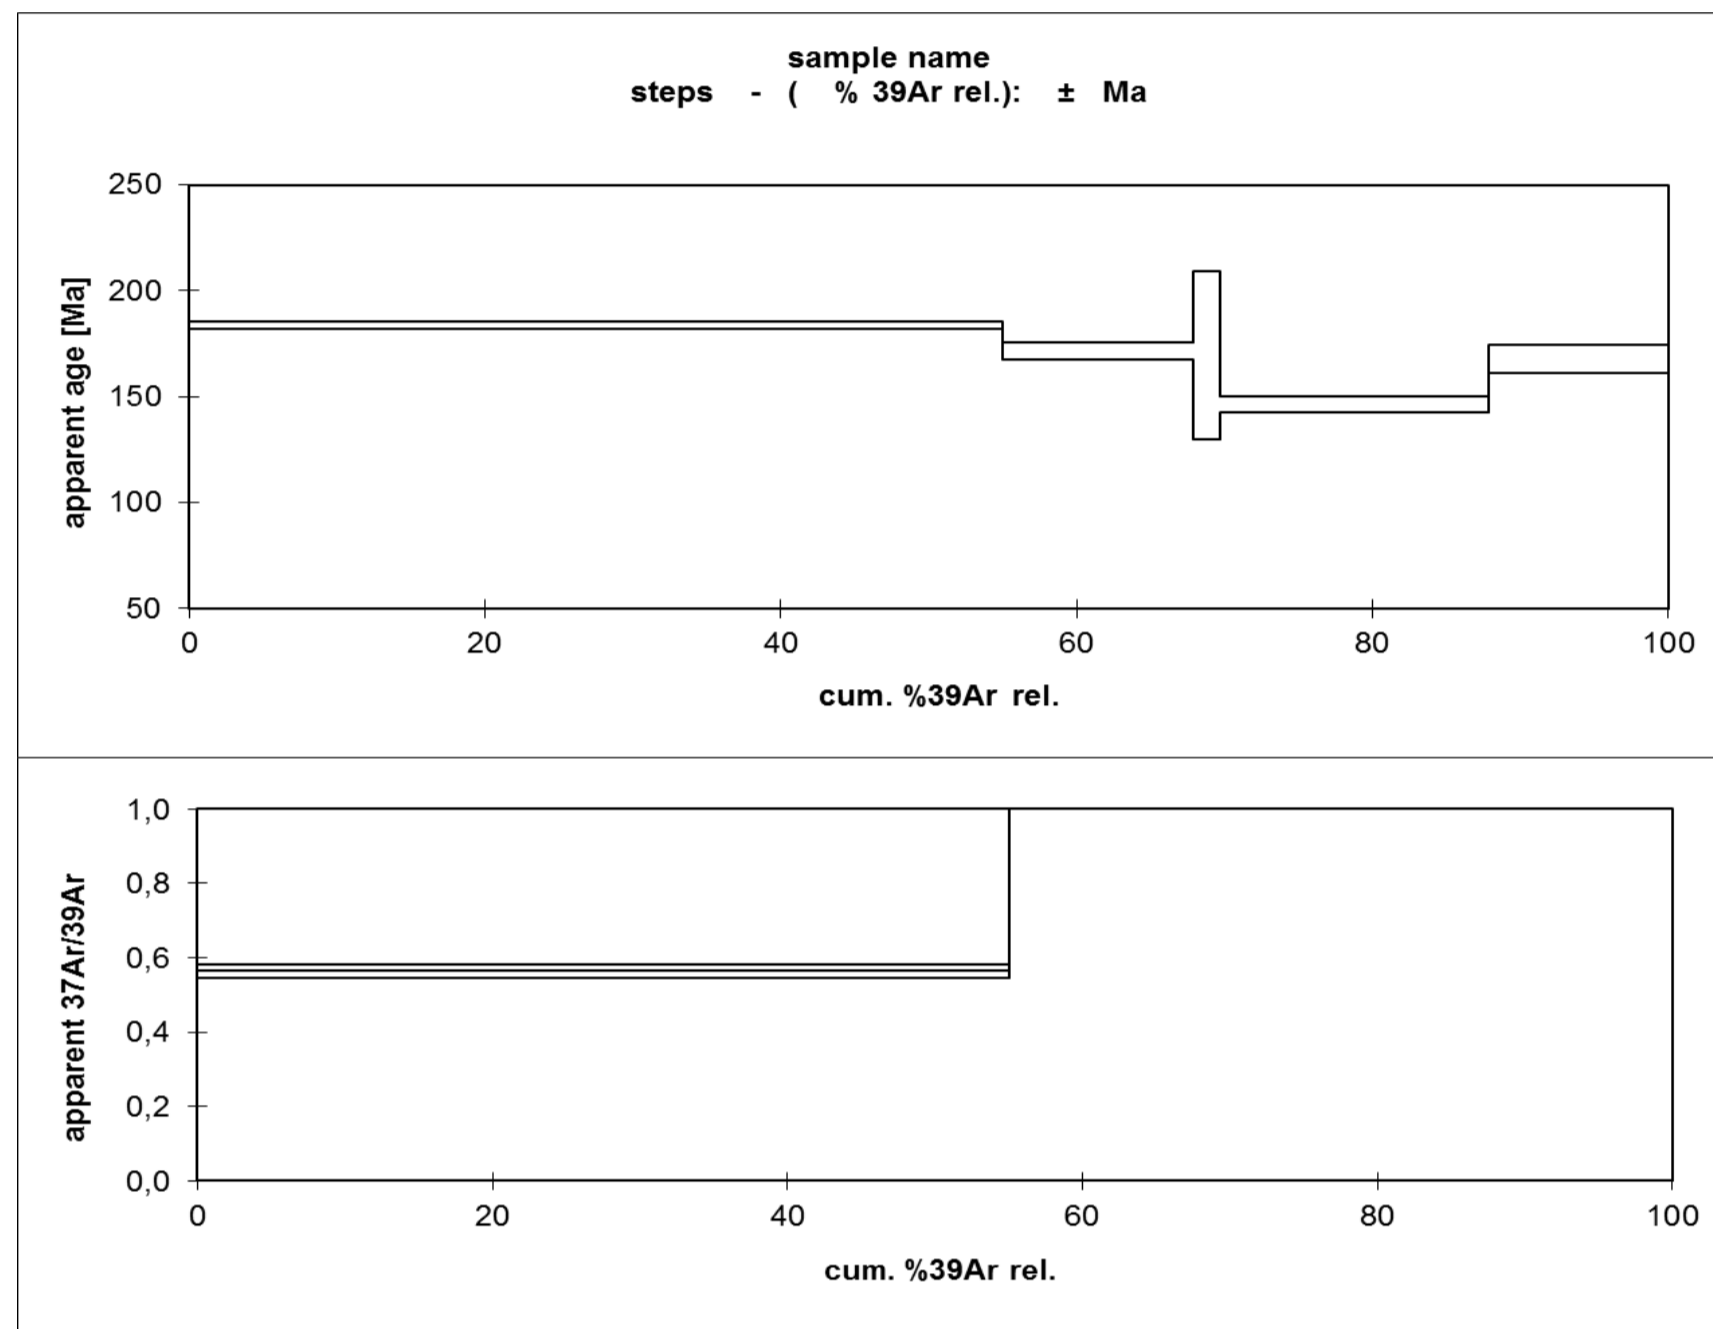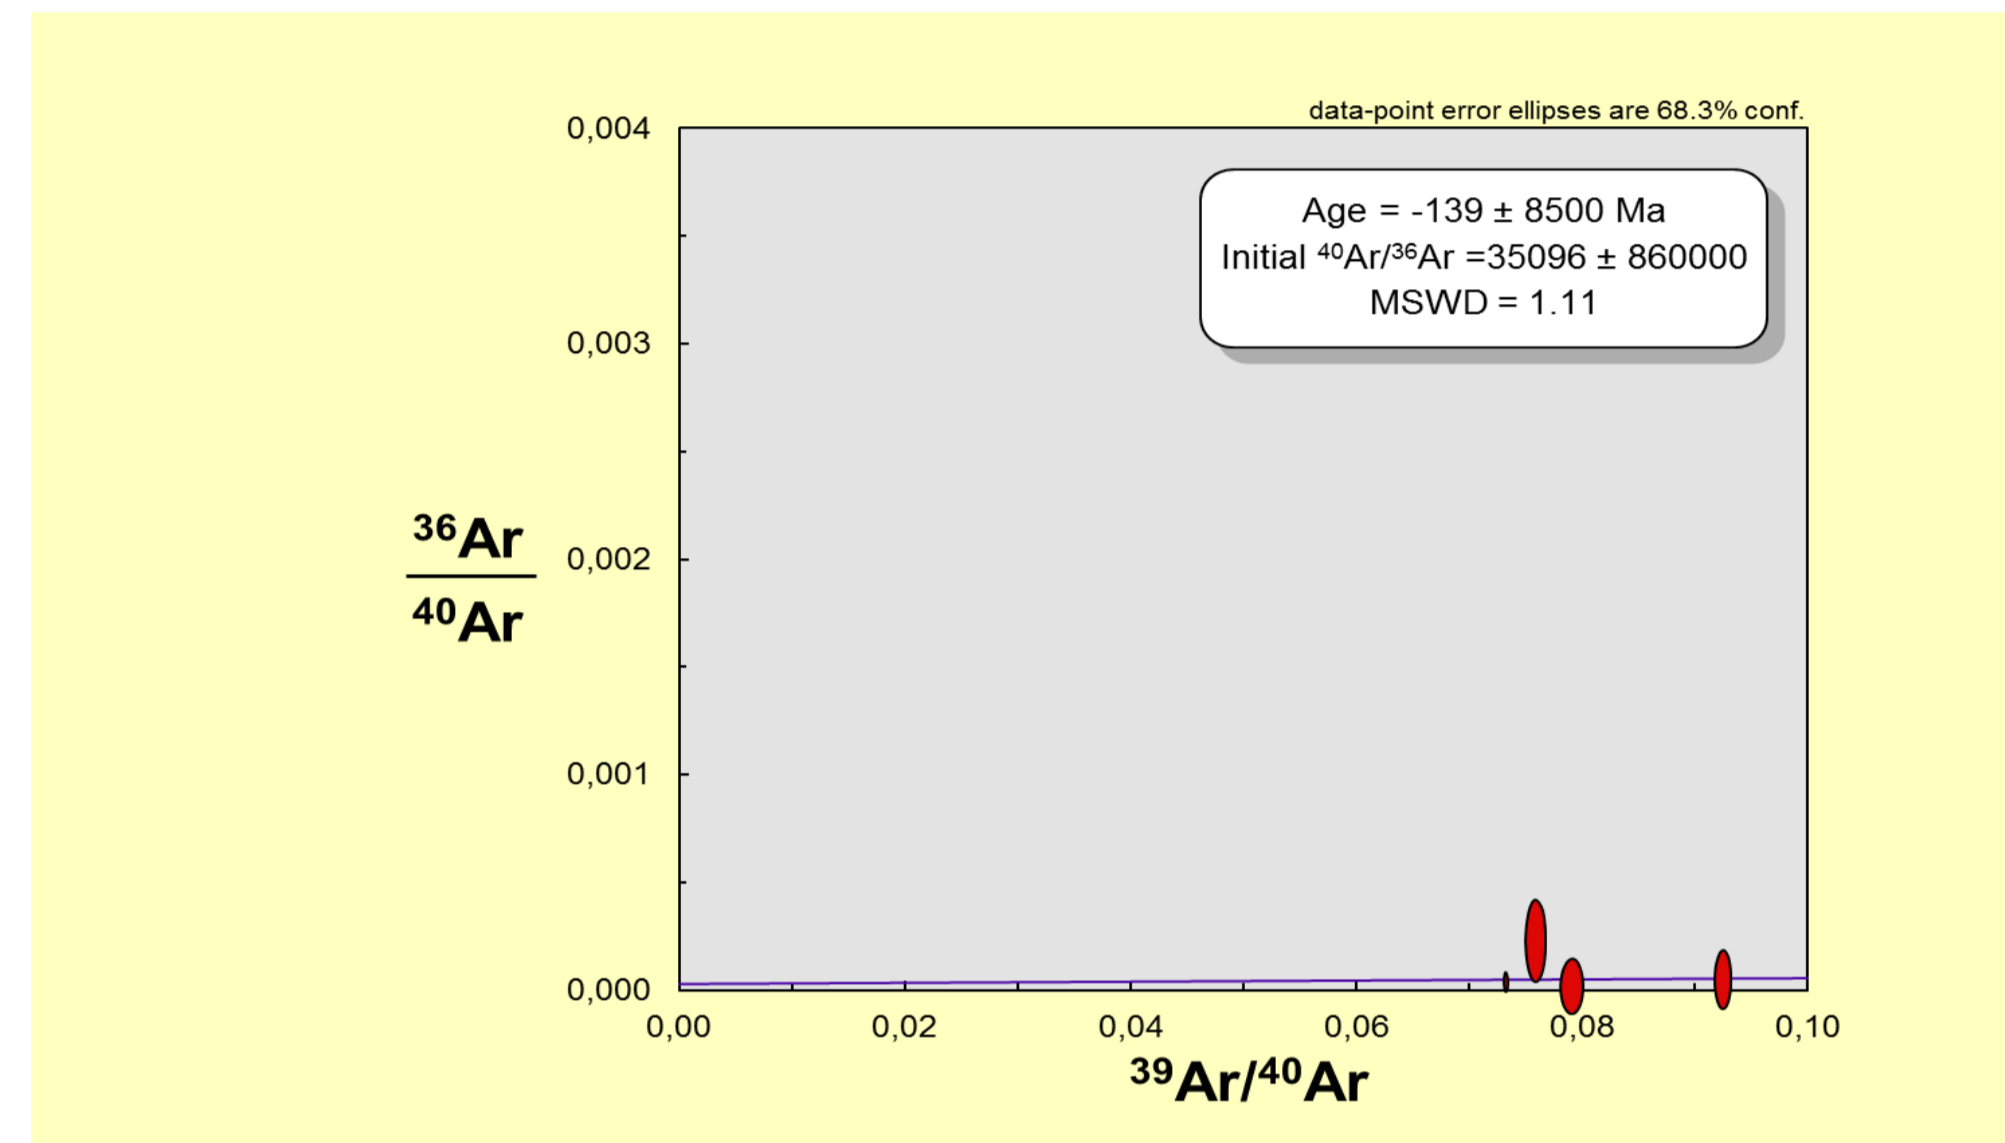

Supplement: Supplementary file 10 [file 1]
