# Supplementary material
Source: publisher figshare collection journal article supplement (https://geolsoc.figshare.com/articles/dataset/_/3453197)
Supplement: Supplementary file 4 [file 1]

**37Ar/39Ar ratios**

|                             |             |             |              |
|-----------------------------|-------------|-------------|--------------|
| sample field number         | ALT-37B     | material:   | Polyhailt    |
| project description         | PWF P22-728 | grain size: | 200-250 µm   |
| number of measurement       | 074066      | number:     | 5            |
| number of irradiation       | 21-92       | notes:      | Altusee mine |
| value of irradiation        | 0.010563    | (±1-sigma)  |              |
| duration of irradiation [h] | 16.0        |             |              |
| year of irradiation         | 2007        |             |              |
| julian day of irradiation   | 157         |             |              |

conversion from [V] to [eps] by:  
 composition of atmospheric argon: (40Ar/36Ar)atm. = 295.5  
 half-life of 37Ar [a]: = 35.1  
 decay constant of 37Ar [E-01]: = 1.975E-02  
 decay constant of 39Ar [E-01]: = 7.984E-06  
 decay constant of 40K [E-01]: = 5.543E-10  
 correction for Ca-derived Ar: (36Ar/37Ar)Ca = 2.250E-04  
 correction for K-derived Ar: (40Ar/39Ar)K = 2.600E-02  
 correction for K-derived Ar: (38Ar/39Ar)K = 1.170E-02

±1-sigma  
 (Steiger & Jäger 1977)  
 (Stoerner et al. 1965)  
 (Steiger & Jäger 1977)  
 Measured  
 Measured  
 Measured

| sample   | 36Ar        | 37Ar   | 38Ar        | 39Ar   | 40Ar        | 40Ar/39Ar | date of measurement | days elapsed | post-irrad. 37Ar decay factor | number of steps | mean of dec 37Ar corr. factor |     |     |           |    |           |
|----------|-------------|--------|-------------|--------|-------------|-----------|---------------------|--------------|-------------------------------|-----------------|-------------------------------|-----|-----|-----------|----|-----------|
| 0707056a | 3.28184E-06 | 2.1675 | 2.24784E-06 | 6.6030 | 5.26736E-06 | 2.1784    | 1.28607E-05         | 2.1251       | 2.59825E-04                   | 0.3524          | 2007                          | 324 | 167 | 2.723E+01 | 16 | 2.925E+01 |
| b 2.6%   | 4.51072E-06 | 2.0244 | 3.67802E-06 | 4.7190 | 3.17020E-06 | 0.9714    | 2.53896E-03         | 0.1461       | 2.21892E-02                   | 0.0119          | 2007                          | 324 |     |           |    |           |
| c 2.7%   | 4.20880E-06 | 2.3157 | 2.31471E-06 | 5.2917 | 1.45065E-05 | 0.8516    | 9.40002E-04         | 0.1823       | 7.81071E-03                   | 0.1055          | 2007                          | 324 | 167 | 2.723E+01 |    |           |
| d 2.8%   | 3.72918E-06 | 1.3355 | 4.38829E-06 | 3.7222 | 9.49852E-06 | 2.3650    | 4.20781E-04         | 0.3962       | 3.33276E-03                   | 0.1756          | 2007                          | 324 | 167 | 2.723E+01 |    |           |
| e 2.9%   | 3.80347E-06 | 2.9890 | 3.43579E-06 | 4.1900 | 1.14518E-05 | 1.2466    | 5.74639E-04         | 0.2525       | 4.78419E-03                   | 0.1488          | 2007                          | 324 | 167 | 2.723E+01 |    |           |
| f 3.1%   | 3.28184E-06 | 2.1675 | 2.24784E-06 | 6.6030 | 5.26736E-06 | 2.1784    | 1.28607E-05         | 2.1251       | 2.59825E-04                   | 0.3524          | 2007                          | 324 | 167 | 2.723E+01 |    |           |
| g 3.1%   | 3.95594E-06 | 2.0360 | 4.75248E-06 | 3.8266 | 1.35951E-05 | 1.1011    | 8.29706E-04         | 0.0931       | 5.54309E-03                   | 0.1028          | 2007                          | 324 | 167 | 2.723E+01 |    |           |
| h 3.2%   | 3.79889E-06 | 1.8783 | 5.43500E-06 | 1.1981 | 1.03178E-05 | 1.1223    | 4.83466E-04         | 0.1466       | 3.34679E-03                   | 0.0814          | 2007                          | 324 | 167 | 2.723E+01 |    |           |
| i 3.3%   | 3.81593E-06 | 2.0559 | 4.15977E-06 | 3.7797 | 5.96609E-06 | 1.6423    | 1.41358E-05         | 1.3385       | 2.98638E-04                   | 0.3212          | 2007                          | 324 | 167 | 2.723E+01 |    |           |
| 0707056b | 2.34848E-06 | 2.4148 | 3.62566E-06 | 1.4921 | 3.44413E-06 | 4.3048    | 7.20410E-06         | 1.8160       | 1.62166E-04                   | 0.4405          | 2007                          | 331 | 174 | 3.127E+01 |    |           |
| j 3.4%   | 2.72074E-06 | 3.2007 | 4.83302E-06 | 2.5866 | 9.44418E-06 | 1.4870    | 5.38384E-04         | 0.1094       | 3.79884E-03                   | 0.1125          | 2007                          | 331 | 174 | 3.127E+01 |    |           |
| k 3.6%   | 3.04889E-06 | 2.0360 | 4.44898E-06 | 2.3217 | 7.85388E-06 | 1.6467    | 3.74314E-04         | 0.2331       | 2.73179E-03                   | 0.1167          | 2007                          | 331 | 174 | 3.127E+01 |    |           |
| 0707056c | 2.73048E-06 | 2.7141 | 4.34806E-06 | 2.6833 | 3.75660E-06 | 1.7784    | 8.11704E-06         | 1.9762       | 1.60716E-04                   | 0.6504          | 2007                          | 331 | 174 | 3.127E+01 |    |           |
| l 3.8%   | 4.24535E-06 | 2.2009 | 5.15386E-06 | 2.8689 | 6.55220E-05 | 0.3880    | 4.70848E-04         | 0.0058       | 3.53235E-02                   | 0.0430          | 2007                          | 331 | 174 | 3.127E+01 |    |           |
| m 3.9%   | 2.73048E-06 | 2.7141 | 4.34806E-06 | 2.6833 | 3.75660E-06 | 1.7784    | 8.11704E-06         | 1.9762       | 1.60716E-04                   | 0.6504          | 2007                          | 331 | 174 | 3.127E+01 |    |           |
| n 4.0%   | 3.46908E-06 | 2.7141 | 5.02458E-06 | 2.0424 | 2.38882E-05 | 0.8344    | 1.67556E-03         | 0.0714       | 1.36240E-02                   | 0.0737          | 2007                          | 331 | 174 | 3.127E+01 |    |           |
| 0707056d | 3.00303E-06 | 2.9389 | 4.46317E-06 | 2.8925 | 4.46618E-06 | 2.8465    | 6.79526E-06         | 1.0763       | 1.66078E-04                   | 0.9428          | 2007                          | 331 | 174 | 3.127E+01 |    |           |
| p 4.3%   | 3.03410E-06 | 6.1330 | 4.67523E-06 | 1.8972 | 6.64615E-06 | 2.2557    | 2.40466E-04         | 0.2757       | 2.08052E-03                   | 0.1157          | 2007                          | 331 | 174 | 3.127E+01 |    |           |
| q 4.4%   | 3.02032E-06 | 2.9589 | 4.46317E-06 | 2.8925 | 4.46618E-06 | 2.8465    | 6.79526E-06         | 1.0763       | 1.66078E-04                   | 0.9428          | 2007                          | 331 | 174 | 3.127E+01 |    |           |
| r 4.6%   | 3.46251E-06 | 1.8998 | 5.02579E-06 | 2.4925 | 2.03193E-05 | 1.5884    | 1.43858E-03         | 0.1439       | 1.21616E-02                   | 0.1168          | 2007                          | 331 | 174 | 3.127E+01 |    |           |

| blank- and background-corrected intensities and absolute errors (1-sigma abs.) | 36Ar        | 37Ar     | 38Ar        | 39Ar     | 40Ar        | 40Ar/39Ar | 36Ar/39Ar   | 37Ar/39Ar | 38Ar/39Ar   | 39Ar/39Ar | 40Ar/39Ar | 40Ar/39Ar | 40Ar/39Ar | 40Ar/39Ar   | 40Ar/39Ar    | 40Ar/39Ar | age [Ma]     | ±1-sigma [Ma] | ±1-sigma [Ma] |          |             |              |              |             |            |             |             |             |             |          |          |           |     |           |
|--------------------------------------------------------------------------------|-------------|----------|-------------|----------|-------------|-----------|-------------|-----------|-------------|-----------|-----------|-----------|-----------|-------------|--------------|-----------|--------------|---------------|---------------|----------|-------------|--------------|--------------|-------------|------------|-------------|-------------|-------------|-------------|----------|----------|-----------|-----|-----------|
| b 2.6%                                                                         | 1.01678E+02 | 7.63E+00 | 8.90187E+01 | 1.42E+01 | 1.65012E+03 | 2.05E+01  | 1.57555E+05 | 2.32E+02  | 1.36887E+06 | 9.98E+02  | 10.52     | 10.52     | 97.81     | 0.000645349 | 4.84493E-05  | 0.000565  | 9.04258E-05  | 0.010473      | 0.000131114   | 8.688241 | 0.014273805 | 0.015387077  | 0.002462629  | 157553.3991 | 231.988827 | 1.33480E+06 | 2465.760893 | 8.472044    | 0.000014    | 155.9    | 0.8      | 8.641E-01 |     |           |
| c 2.7%                                                                         | 5.73738E+01 | 7.53E+00 | 4.71418E+00 | 1.20E+01 | 5.76725E+02 | 1.08E+01  | 5.78740E+04 | 1.08E+02  | 4.71341E+05 | 5.18E+02  | 3.86      | 14.39     | 96.37     | 0.000998    | 0.000130116  | 0.000072  | 0.000207563  | 0.000072      | 0.000207563   | 0.000965 | 0.000182809 | 8.144266     | 0.017672694  | 0.001964229 | 0.00652701 | 57973.91897 | 108.371953  | 452747.7199 | 2284.491249 | 7.823001 | 0.042102 | 144.4     | 1.0 | 1.046E+00 |
| d 2.8%                                                                         | 2.76245E+01 | 5.42E+00 | 1.38117E+02 | 1.31E+01 | 2.84177E+02 | 1.96E+01  | 2.94639E+04 | 1.09E+02  | 1.91818E+05 | 3.70E+02  | 1.70      | 16.09     | 95.81     | 0.001097    | 0.00021917   | 0.000247  | 0.000414252  | 0.010372      | 0.00020473    | 7.532990 | 0.024411418 | 0.142897867  | 0.014049377  | 26451.57981 | 105.457588 | 193131.6351 | 1644.039630 | 7.192469    | 0.071110    | 133.2    | 1.4      | 1.439E+00 |     |           |
| e 2.9%                                                                         | 3.26512E+01 | 8.37E+00 | 7.41542E+01 | 1.29E+01 | 3.88542E+02 | 1.16E+01  | 3.50873E+04 | 9.22E+01  | 2.82420E+05 | 4.51E+02  | 2.34      | 18.43     | 96.63     | 0.000929    | 0.00023873   | 0.000215  | 0.000361017  | 0.011080      | 0.000328016   | 8.053649 | 0.024767227 | 0.05789038   | 0.010024925  | 35066.06964 | 92.164966  | 271999.4746 | 2514.567864 | 7.766771    | 0.074551    | 143.2    | 1.5      | 1.510E+00 |     |           |
| f 3.0%                                                                         | 3.61787E+02 | 1.19E+01 | 2.04142E+02 | 1.29E+01 | 5.10462E+03 | 2.68E+01  | 4.73074E+05 | 4.62E+02  | 3.39311E+06 | 1.84E+03  | 31.59     | 50.02     | 96.85     | 0.000765    | 2.521179E-05 | 0.000432  | 2.72076E-05  | 0.010789      | 0.00001596    | 7.175018 | 0.00001596  | 0.011761937  | 0.00074995   | 473070.2007 | 461.870850 | 3275189.671 | 3974.925365 | 6.923264    | 0.010784    | 128.4    | 0.6      | 6.617E-01 |     |           |
| g 3.1%                                                                         | 1.01138E+01 | 7.00E+00 | 3.69861E+01 | 1.50E+01 | 4.76218E+02 | 1.12E+01  | 5.07222E+04 | 4.9E+01   | 3.37368E+05 | 3.61E+02  | 5.39      | 53.41     | 99.10     | 0.000169    | 0.000137918  | 0.000729  | 0.000256854  | 0.000269      | 0.000223699   | 6.454153 | 0.004907618 | 0.019864973  | 0.00027191   | 60721.61604 | 49.474967  | 323268.2651 | 2088.79841  | 6.370031    | 0.041838    | 116.5    | 0.9      | 9.695E-01 |     |           |
| h 3.2%                                                                         | 3.10237E+01 | 6.65E+00 | 7.96024E+01 | 1.06E+01 | 2.71642E+02 | 9.47E+00  | 2.92959E+04 | 4.58E+01  | 1.90272E+05 | 1.89E+02  | 1.96      | 55.36     | 100.03    | 0.000011    | 0.000225129  | 0.000217  | 0.00036263   | 0.000272      | 0.000323532   | 6.494824 | 0.011871362 | 0.073999008  | 0.00987546   | 29294.56156 | 45.771089  | 189544.8861 | 1957.342660 | 6.470310    | 0.067577    | 120.3    | 1.3      | 1.361E+00 |     |           |
| i 3.3%                                                                         | 1.37391E+01 | 7.79E+00 | 1.00519E+02 | 1.33E+01 | 1.89989E+02 | 1.09E+01  | 2.05973E+04 | 3.16E+01  | 1.35262E+05 | 1.25E+02  | 1.38      | 56.74     | 99.83     | 0.000067    | 0.000370251  | 0.000480  | 0.000465073  | 0.002616      | 0.000527347   | 6.567972 | 0.011762421 | 0.132894274  | 0.01158771   | 26565.58524 | 31.590021  | 134510.4334 | 2326.737546 | 6.531032    | 0.112400    | 121.4    | 2.1      | 2.115E+00 |     |           |
| j 3.4%                                                                         | 2.03402E+01 | 6.64E+00 | 6.29439E+01 | 1.95E+01 | 3.80777E+02 | 1.89E+01  | 3.51795E+04 | 3.75E+01  | 2.27098E+05 | 2.71E+02  | 2.21      | 58.95     | 97.40     | 0.000613    | 0.000200227  | 0.001898  | 0.000267068  | 0.001484      | 0.000385997   | 6.846279 | 0.011258906 | 0.059361778  | 0.008351658  | 33156.7128  | 37.478415  | 220246.7352 | 1980.584675 | 6.842599    | 0.062004    | 123.4    | 1.2      | 1.250E+00 |     |           |
| k 3.6%                                                                         | 4.08240E+01 | 5.30E+00 | 3.89151E+01 | 7.37E+00 | 2.75272E+02 | 1.23E+01  | 2.29174E+04 | 5.50E+01  | 1.60401E+05 | 2.05E+02  | 1.53      | 60.48     | 92.50     | 0.001781    | 0.000231113  | 0.001698  | 0.000321472  | 0.012011      | 0.000536963   | 6.999089 | 0.019014813 | 0.050399911  | 0.010062738  | 22916.6623  | 64.951537  | 147808.8419 | 1578.394227 | 6.448842    | 0.070990    | 119.9    | 1.4      | 1.409E+00 |     |           |
| l 3.8%                                                                         | 4.46248E+01 | 7.44E+00 | 5.02986E+01 | 1.17E+01 | 3.29372E+03 | 1.43E+01  | 2.93283E+05 | 1.98E+01  | 2.19493E+06 | 9.95E+02  | 10.59     | 80.08     | 98.73     | 0.000322    | 2.53899E-05  | 0.000171  | 3.99535E-05  | 0.011225      | 4.87761E-05   | 7.480293 | 0.00327953  | 0.00363048   | 0.001240318  | 29347.4337  | 19.722557  | 215926.551  | 2396.417038 | 7.358493    | 0.008162    | 136.2    | 0.7      | 7.074E-01 |     |           |
| m 3.9%                                                                         | 4.31623E+01 | 6.31E+00 | 2.08571E+01 | 8.89E+00 | 9.11985E+02 | 1.52E+01  | 7.99877E+04 | 1.00E+02  | 6.11297E+05 | 4.39E+02  | 5.34      | 85.42     | 97.90     | 0.000540    | 7.88285E-05  | -0.000261 | -0.000111092 | 0.0114021     | 0.000190448   | 7.642392 | 0.011218863 | -0.008154003 | -0.003473962 | 7.99881E+04 | 102.366778 | 596371.8715 | 1914.302021 | 7.455757    | 0.025765    | 137.9    | 0.8      | 8.375E-01 |     |           |
| n 4.0%                                                                         | 4.61051E+01 | 7.48E+00 | 4.22297E+01 | 9.66E+00 | 1.25665E+03 | 1.31E+01  | 1.04085E+05 | 7.53E+01  | 8.40405E+05 | 6.30E+02  | 6.95      | 92.37     | 98.38     | 0.000443    | 7.18595E-05  | 0.000406  | 9.27852E-05  | 0.012073      | 0.0004126377  | 8.074210 | 0.008415281 | 0.012887345  | 0.002901794  | 1.04084E+05 | 75.347039  | 824099.5458 | 2288.339643 | 7.917619    | 0.022813    | 146.1    | 0.8      | 8.441E-01 |     |           |
| p 4.3%                                                                         | 1.67578E+01 | 1.29E+01 | 1.32033E+01 | 9.76E+00 | 1.36078E+02 | 1.22E+01  | 1.44670E+04 | 4.18E+01  | 1.19503E+05 | 1.79E+02  | 0.97      | 93.34     | 99.81     | 0.000000    | 0.000000072  | 0.000513  | 0.000874308  | 0.000406      | 0.000446666   | 8.292424 | 0.00889852  | 0.02838551   | 0.0219882    |             |            |             |             |             |             |          |          |           |     |           |
