# Supplementary material
Source: publisher figshare collection journal article supplement (https://geolsoc.figshare.com/articles/dataset/_/3453197)
Supplement: Supplementary file 5 [file 1]

| sample  | location            | level                      | rock                 | thin section | FI | VR | IC | <sup>40</sup> Ar/ <sup>39</sup> Ar | polyhalite rock type |
|---------|---------------------|----------------------------|----------------------|--------------|----|----|----|------------------------------------|----------------------|
| ALT-9   | Altaussee mine      | Erbstollen 774 m a.s.l.    | anhydrite-polyhalite | 1            | -  | -  | -  | -                                  | 1B                   |
| ALT-11  | Altaussee mine      | Androsch 815 m a.s.l.      | anhydrite-polyhalite | 1            | -  | -  | -  | 2                                  | 1A                   |
| ALT-11E | Altaussee mine      | Androsch 815 m a.s.l.      | polyhalite           | -            | 1  | -  | -  | -                                  | -                    |
| ALT-13  | Altaussee mine      | Androsch 815 m a.s.l.      | anhydrite-polyhalite | 2            | -  | -  | -  | 2                                  | 1A                   |
| ALT-15  | Altaussee mine      | Androsch 815 m a.s.l.      | anhydrite-polyhalite | 2            | -  | -  | -  | -                                  | 1B                   |
| ALT-18D | Altaussee mine      | Androsch 815 m a.s.l.      | anhydrite-polyhalite | 3            | -  | -  | -  | -                                  | 1A                   |
| ALT-27B | Altaussee mine      | Blind 881 m a.s.l.         | anhydrite-polyhalite | 1            | -  | -  | -  | -                                  | 1B                   |
| ALT-35  | Altaussee mine      | Franzberg 914 m a.s.l.     | polyhalite           | 2            | -  | -  | 1  | 1                                  | 2B                   |
| ALT-37B | Altaussee mine      | Franzberg 914 m a.s.l.     | polyhalite           | 1            | -  | -  | -  | 4                                  | 2A                   |
| ALT-42A | Altaussee mine      | Franzberg 914 m a.s.l.     | polyhalite           | 1            | -  | -  | -  | 1                                  | 3                    |
| ALT-42B | Altaussee mine      | Franzberg 914 m a.s.l.     | polyhalite           | 2            | -  | -  | -  | -                                  | (2C)                 |
| ALT-53B | Altaussee mine      | Erbstollen 774 m a.s.l.    | polyhalite           | 1            | -  | -  | -  | 1                                  | 3                    |
| ALT-59  | Altaussee mine      | Androsch 815 m a.s.l.      | polyhalite           | 1            | -  | -  | -  | -                                  | 2B                   |
| ALT-63B | Altaussee mine      | Franzberg 914 m a.s.l.     | polyhalite           | 1            | -  | -  | -  | -                                  | 2B                   |
| ALT-70B | Altaussee mine      | Franzberg 914 m a.s.l.     | polyhalite           | 1            | -  | -  | -  | -                                  | (2C)                 |
| ALT-72A | Altaussee mine      | Franzberg 914 m a.s.l.     | anhydrite-polyhalite | 1            | -  | -  | -  | -                                  | 1B                   |
| ALT-72B | Altaussee mine      | Franzberg 914 m a.s.l.     | anhydrite-polyhalite | 1            | -  | -  | -  | -                                  | 1B                   |
| ALT-74  | Altaussee mine      | Franzberg 914 m a.s.l.     | anhydrite-polyhalite | 1            | -  | -  | -  | -                                  | (1A)                 |
| ALT-78  | Altaussee mine      | Franzberg 914 m a.s.l.     | anhydrite-polyhalite | -            | 1  | -  | -  | -                                  | 2C                   |
| ALT-79  | Altaussee mine      | Steinberg 985 m a.s.l.     | anhydrite-polyhalite | 2            | -  | -  | -  | -                                  | (1A)                 |
| BDG-17  | Berchtesgaden mine  | Tiefbausohle 476 m a.s.l.  | sandstone            | -            | -  | 1  | -  | -                                  | -                    |
| BDG-22A | Berchtesgaden mine  | Tiefbausohle 476 m a.s.l.  | polyhalite           | 1            | -  | -  | -  | -                                  | 2B                   |
| BDG-22B | Berchtesgaden mine  | Tiefbausohle 476 m a.s.l.  | anhydrite-polyhalite | 1            | -  | -  | -  | -                                  | 1B                   |
| BDG-22D | Berchtesgaden mine  | Tiefbausohle 476 m a.s.l.  | anhydrite-polyhalite | 1            | -  | -  | -  | -                                  | 1B                   |
| BDG-28  | Berchtesgaden mine  | Tiefbausohle 476 m a.s.l.  | anhydrite-polyhalite | 1            | -  | -  | 1  | -                                  | 2C                   |
| BDG-32  | Berchtesgaden mine  | Tiefbausohle 476 m a.s.l.  | anhydrite-polyhalite | 1            | -  | -  | -  | -                                  | (1B)                 |
| BDG-37B | Berchtesgaden mine  | Tiefbausohle 476 m a.s.l.  | anhydrite            | -            | 1  | -  | -  | -                                  | -                    |
| BDG-37D | Berchtesgaden mine  | Tiefbausohle 476 m a.s.l.  | polyhalite           | 1            | -  | -  | -  | 1                                  | 3                    |
| BDG-41  | Berchtesgaden mine  | Tiefbausohle 476 m a.s.l.  | sandstone            | -            | -  | 1  | -  | -                                  | -                    |
| BDG-76  | Berchtesgaden mine  | Tiefbausohle 476 m a.s.l.  | sandstone            | -            | -  | 1  | -  | -                                  | -                    |
| BDG-92  | Berchtesgaden mine  | Tiefbausohle 476 m a.s.l.  | polyhalite           | 1            | -  | -  | -  | 2                                  | 2B                   |
| BDG-B4  | Berchtesgaden mine  | Tiefbausohle 476 m a.s.l.  | polyhalite           | 1            | -  | -  | -  | 1                                  | 2B                   |
| DÜ-3A   | Bad Dürrenberg mine | Wolfdietrich 540 m a.s.l.  | polyhalite           | 1            | -  | -  | -  | -                                  | 2A                   |
| DÜ-3B   | Bad Dürrenberg mine | Wolfdietrich 540 m a.s.l.  | polyhalite           | 1            | -  | -  | -  | -                                  | 2A                   |
| DÜ-9    | Bad Dürrenberg mine | Wolfdietrich 540 m a.s.l.  | polyhalite           | 2            | -  | -  | -  | 1                                  | 2B                   |
| DÜ-29   | Bad Dürrenberg mine | Obersteinberg 714 m a.s.l. | polyhalite           | 1            | -  | -  | -  | -                                  | 2A                   |
| DÜ-38   | Bad Dürrenberg mine | Obersteinberg 714 m a.s.l. | mudrock              | -            | -  | -  | 1  | -                                  | -                    |
