# Supplementary material
Source: publisher figshare collection journal article supplement (https://geolsoc.figshare.com/articles/dataset/_/3453197)
Supplement: Supplementary file 8 [file 1]

| Step                              | <sup>39</sup> Ar <sup>1</sup> | ±   | <sup>39</sup> Ar/ <sup>39</sup> Ar <sup>2</sup> | ±        | <sup>39</sup> Ar/ <sup>39</sup> Ar <sup>2</sup> | ±     | <sup>39</sup> Ar/ <sup>39</sup> Ar <sup>2</sup> | ±       | <sup>39</sup> Ar/ <sup>39</sup> Ar <sup>2</sup> | ±     | <sup>39</sup> Ar/ <sup>39</sup> Ar <sup>2</sup> | ±    | <sup>39</sup> Ar/ <sup>39</sup> Ar <sup>2</sup> | ±    | % <sup>39</sup> Ar <sup>3</sup> | % <sup>39</sup> Ar | Age (Ma) | ±σ (Ma) |
|-----------------------------------|-------------------------------|-----|-------------------------------------------------|----------|-------------------------------------------------|-------|-------------------------------------------------|---------|-------------------------------------------------|-------|-------------------------------------------------|------|-------------------------------------------------|------|---------------------------------|--------------------|----------|---------|
| Step                              | (counts/sec)                  |     | (counts/sec)                                    |          | (counts/sec)                                    |       | (counts/sec)                                    |         | (counts/sec)                                    |       | (counts/sec)                                    |      | (counts/sec)                                    |      |                                 |                    |          |         |
| <b>Sample: ALT-13_Lab 07s0622</b> |                               |     |                                                 |          |                                                 |       |                                                 |         |                                                 |       |                                                 |      |                                                 |      |                                 |                    |          |         |
|                                   |                               |     |                                                 |          | 200-250 μm                                      |       | J-Value: 0.010620±0.000051                      |         | 1 grain                                         |       |                                                 |      |                                                 |      |                                 |                    |          |         |
| 1                                 | 499                           | 27  | 0.037530                                        | 0.016721 | 2.549                                           | 0.543 | 0.3062                                          | 0.0286  | 13.597                                          | 0.758 | 2.65                                            | 4.92 | 19.5                                            | 0.1  | 50.1                            | 91.7               |          |         |
| 2                                 | 1402                          | 24  | 0.011017                                        | 0.005189 | 0.479                                           | 0.140 | 0.0104                                          | 0.0061  | 11.634                                          | 0.254 | 8.39                                            | 1.53 | 72.2                                            | 0.3  | 153.9                           | 27.2               |          |         |
| 3                                 | 66161                         | 72  | 0.000490                                        | 0.000118 | 0.005                                           | 0.002 | 0.0010                                          | 0.0002  | 9.960                                           | 0.014 | 9.79                                            | 0.04 | 98.5                                            | 14.5 | 178.4                           | 1.0                |          |         |
| 4                                 | 15174                         | 26  | 0.000207                                        | 0.000028 | 0.041                                           | 0.014 | 0.0083                                          | 0.0008  | 10.528                                          | 0.022 | 10.44                                           | 0.16 | 99.4                                            | 3.3  | 189.8                           | 2.8                |          |         |
| 5                                 | 277712                        | 204 | 0.000205                                        | 0.000028 | 0.004                                           | 0.001 | 0.0110                                          | 0.0001  | 10.319                                          | 0.008 | 10.23                                           | 0.01 | 99.4                                            | 60.9 | 186.1                           | 0.9                |          |         |
| 6                                 | 93563                         | 94  | 0.000411                                        | 0.000073 | 0.005                                           | 0.002 | 0.0104                                          | 0.0002  | 11.424                                          | 0.012 | 11.28                                           | 0.02 | 98.9                                            | 20.5 | 204.1                           | 0.1                |          |         |
| 7                                 | 1686                          | 23  | 0.001816                                        | 0.000470 | 0.130                                           | 0.104 | 0.0018                                          | 0.0005  | 12.701                                          | 0.177 | 12.15                                           | 1.27 | 95.8                                            | 0.4  | 218.9                           | 21.6               |          |         |
|                                   |                               |     |                                                 |          |                                                 |       |                                                 |         |                                                 |       |                                                 |      |                                                 |      |                                 | Total gas age:     | 188.7    | 0.9     |
| <b>Sample: ALT-13_Lab 07s0731</b> |                               |     |                                                 |          |                                                 |       |                                                 |         |                                                 |       |                                                 |      |                                                 |      |                                 |                    |          |         |
|                                   |                               |     |                                                 |          | 200-250 μm                                      |       | J-Value: 0.010880±0.000055                      |         | 5 grains                                        |       |                                                 |      |                                                 |      |                                 |                    |          |         |
| 1                                 | 59976                         | 85  | 0.000227                                        | 0.000318 | 0.033                                           | 0.083 | 0.0076                                          | 0.0003  | 12.018                                          | 0.019 | 11.93                                           | 0.10 | 99.5                                            | 7.5  | 220.1                           | 0.2                |          |         |
| 2                                 | 61745                         | 106 | 0.000551                                        | 0.000318 | 0.029                                           | 0.140 | 0.0071                                          | 0.0003  | 11.856                                          | 0.021 | 11.67                                           | 0.10 | 98.6                                            | 7.7  | 215.6                           | 0.2                |          |         |
| 3                                 | 9102                          | 38  | 0.000469                                        | 0.000271 | 0.020                                           | 0.580 | -0.0036                                         | -0.0016 | 10.615                                          | 0.046 | 10.45                                           | 0.76 | 98.7                                            | 1.1  | 194.3                           | 13.5               |          |         |
| 4                                 | 74943                         | 82  | 0.000412                                        | 0.000082 | 0.104                                           | 0.037 | 0.0105                                          | 0.0002  | 10.064                                          | 0.012 | 9.92                                            | 0.03 | 98.9                                            | 9.3  | 185.0                           | 1.0                |          |         |
| 5                                 | 46226                         | 64  | 0.000387                                        | 0.000236 | 0.045                                           | 0.040 | 0.0108                                          | 0.0003  | 10.652                                          | 0.017 | 10.51                                           | 0.07 | 99.0                                            | 5.8  | 195.4                           | 1.6                |          |         |
| 6                                 | 47293                         | 83  | 0.000196                                        | 0.000161 | 0.031                                           | 0.042 | 0.0099                                          | 0.0003  | 10.718                                          | 0.020 | 10.64                                           | 0.05 | 99.5                                            | 5.9  | 197.5                           | 1.3                |          |         |
| 7                                 | 26648                         | 45  | 0.000102                                        | 0.000310 | 0.022                                           | 0.077 | 0.0099                                          | 0.0004  | 10.889                                          | 0.022 | 10.83                                           | 0.09 | 99.7                                            | 3.3  | 201.0                           | 1.9                |          |         |
| 8                                 | 8206                          | 47  | 0.000699                                        | 0.000852 | 1.567                                           | 0.273 | 0.0057                                          | 0.0015  | 11.479                                          | 0.069 | 11.36                                           | 0.26 | 99.1                                            | 1.0  | 210.3                           | 4.7                |          |         |
| 9                                 | 173301                        | 167 | 0.000105                                        | 0.000028 | 0.128                                           | 0.010 | 0.0105                                          | 0.0002  | 11.235                                          | 0.013 | 11.19                                           | 0.02 | 99.8                                            | 21.6 | 207.2                           | 1.0                |          |         |
| 10                                | 31724                         | 108 | 0.000926                                        | 0.000255 | 0.542                                           | 0.063 | 0.0097                                          | 0.0004  | 11.193                                          | 0.041 | 10.93                                           | 0.09 | 97.9                                            | 3.9  | 202.8                           | 1.8                |          |         |
| 11                                | 217303                        | 249 | 0.000020                                        | 0.000040 | 0.043                                           | 0.006 | 0.0109                                          | 0.0001  | 11.371                                          | 0.014 | 11.34                                           | 0.02 | 100.0                                           | 27.0 | 209.9                           | 1.1                |          |         |
| 12                                | 47018                         | 88  | 0.000048                                        | 0.000187 | 0.145                                           | 0.030 | 0.0109                                          | 0.0002  | 11.179                                          | 0.024 | 11.15                                           | 0.06 | 100.0                                           | 5.9  | 206.5                           | 1.4                |          |         |
|                                   |                               |     |                                                 |          |                                                 |       |                                                 |         |                                                 |       |                                                 |      |                                                 |      |                                 | Total gas age:     | 205.7    | 1.0     |
| <b>Sample: DÜ-9_Lab 09s0672</b>   |                               |     |                                                 |          |                                                 |       |                                                 |         |                                                 |       |                                                 |      |                                                 |      |                                 |                    |          |         |
|                                   |                               |     |                                                 |          | 200-250 μm                                      |       | J-Value: 0.007944±0.000017                      |         | 5 grains                                        |       |                                                 |      |                                                 |      |                                 |                    |          |         |
| 1                                 | 99079                         | 102 | 0.000626                                        | 0.000041 | 0.485                                           | 0.004 | 0.0141                                          | 0.0001  | 15.195                                          | 0.020 | 15.02                                           | 0.02 | 99.0                                            | 11.3 | 203.4                           | 0.5                |          |         |
| 2                                 | 73963                         | 56  | 0.000393                                        | 0.000041 | 0.473                                           | 0.006 | 0.0106                                          | 0.0001  | 15.836                                          | 0.018 | 15.73                                           | 0.02 | 99.5                                            | 8.4  | 212.4                           | 0.5                |          |         |
| 3                                 | 125523                        | 88  | 0.000445                                        | 0.000033 | 0.472                                           | 0.006 | 0.0107                                          | 0.0001  | 17.341                                          | 0.031 | 17.22                                           | 0.03 | 99.4                                            | 14.3 | 231.3                           | 0.6                |          |         |
| 4                                 | 163094                        | 119 | 0.000590                                        | 0.000018 | 0.475                                           | 0.004 | 0.0128                                          | 0.0001  | 15.115                                          | 0.017 | 14.95                                           | 0.02 | 99.1                                            | 18.6 | 202.5                           | 0.5                |          |         |
| 5                                 | 8431                          | 15  | 0.002990                                        | 0.000477 | 0.579                                           | 0.061 | 0.0215                                          | 0.0008  | 17.928                                          | 0.034 | 17.06                                           | 0.14 | 95.3                                            | 1.0  | 229.3                           | 1.9                |          |         |
| 6                                 | 124704                        | 117 | 0.000346                                        | 0.000028 | 0.501                                           | 0.005 | 0.0117                                          | 0.0001  | 17.279                                          | 0.032 | 17.19                                           | 0.03 | 99.6                                            | 14.2 | 230.9                           | 0.6                |          |         |
| 7                                 | 63720                         | 126 | 0.000499                                        | 0.000079 | 0.563                                           | 0.006 | 0.0139                                          | 0.0002  | 14.423                                          | 0.030 | 14.29                                           | 0.04 | 99.2                                            | 7.3  | 194.0                           | 0.6                |          |         |
| 8                                 | 24514                         | 56  | 0.000758                                        | 0.000190 | 0.681                                           | 0.016 | 0.0120                                          | 0.0005  | 14.512                                          | 0.035 | 14.41                                           | 0.07 | 98.8                                            | 2.8  | 194.3                           | 0.9                |          |         |
| 9                                 | 192996                        | 102 | 0.000396                                        | 0.000026 | 0.502                                           | 0.005 | 0.0114                                          | 0.0001  | 15.543                                          | 0.009 | 15.44                                           | 0.01 | 99.5                                            | 22.0 | 208.7                           | 0.5                |          |         |
|                                   |                               |     |                                                 |          |                                                 |       |                                                 |         |                                                 |       |                                                 |      |                                                 |      |                                 | Total gas age:     | 212.4    | 0.5     |
| <b>Sample: BDG-9_Lab 09s0638</b>  |                               |     |                                                 |          |                                                 |       |                                                 |         |                                                 |       |                                                 |      |                                                 |      |                                 |                    |          |         |
|                                   |                               |     |                                                 |          | 200-250 μm                                      |       | J-Value: 0.007917±0.000018                      |         | 5 grains                                        |       |                                                 |      |                                                 |      |                                 |                    |          |         |
| 1                                 | 22004                         | 203 | 0.001588                                        | 0.000030 | 0.564                                           | 0.003 | 0.0147                                          | 0.0001  | 11.433                                          | 0.014 | 10.98                                           | 0.02 | 96.2                                            | 61.9 | 150.4                           | 0.4                |          |         |
| 2                                 | 3773                          | 16  | 0.005691                                        | 0.001128 | 0.368                                           | 0.035 | 0.0308                                          | 0.0018  | 12.725                                          | 0.074 | 11.04                                           | 0.34 | 86.9                                            | 1.1  | 151.2                           | 4.5                |          |         |
| 3                                 | 3225                          | 27  | 0.002671                                        | 0.001963 | 0.876                                           | 0.048 | 0.0141                                          | 0.0015  | 11.170                                          | 0.095 | 10.42                                           | 0.59 | 93.4                                            | 0.9  | 143.0                           | 7.8                |          |         |
| 4                                 | 5833                          | 20  | 0.003121                                        | 0.001022 | 0.620                                           | 0.042 | 0.0094                                          | 0.0011  | 10.295                                          | 0.038 | 9.39                                            | 0.30 | 91.4                                            | 1.6  | 129.4                           | 4.1                |          |         |
| 5                                 | 50900                         | 56  | 0.001383                                        | 0.000064 | 0.814                                           | 0.007 | 0.0127                                          | 0.0002  | 10.667                                          | 0.013 | 10.29                                           | 0.02 | 96.7                                            | 14.3 | 141.3                           | 0.4                |          |         |
| 6                                 | 19356                         | 35  | 0.001952                                        | 0.000198 | 1.305                                           | 0.015 | 0.0142                                          | 0.0003  | 10.913                                          | 0.021 | 10.40                                           | 0.06 | 95.5                                            | 5.4  | 142.8                           | 0.9                |          |         |
| 7                                 | 39294                         | 40  | 0.000897                                        | 0.000095 | 2.098                                           | 0.013 | 0.0135                                          | 0.0002  | 9.762                                           | 0.011 | 9.62                                            | 0.03 | 98.7                                            | 11.1 | 132.4                           | 0.5                |          |         |
| 8                                 | 3776                          | 18  | 0.015885                                        | 0.001241 | 60.085                                          | 4.01  | 0.0581                                          | 0.0015  | 13.621                                          | 0.075 | 13.39                                           | 0.39 | 94.9                                            | 1.1  | 181.8                           | 5.0                |          |         |
| 9                                 | 2878                          | 18  | 0.044142                                        | 0.001126 | 123.288                                         | 1.285 | 0.1253                                          | 0.0023  | 17.831                                          | 0.113 | 14.02                                           | 0.37 | 72.8                                            | 0.8  | 189.9                           | 4.8                |          |         |
| 10                                | 6506                          | 48  | 0.137320                                        | 0.002425 | 208.740                                         | 1.696 | 0.2510                                          | 0.0028  | 40.867                                          | 0.314 | 16.22                                           | 0.77 | 34.6                                            | 1.8  | 218.0                           | 9.8                |          |         |
|                                   |                               |     |                                                 |          |                                                 |       |                                                 |         |                                                 |       |                                                 |      |                                                 |      |                                 | Total gas age:     | 147.5    | 0.4     |
| <b>Sample: BDG-92_Lab 09s0618</b> |                               |     |                                                 |          |                                                 |       |                                                 |         |                                                 |       |                                                 |      |                                                 |      |                                 |                    |          |         |
|                                   |                               |     |                                                 |          | 200-250 μm                                      |       | J-Value: 0.007917±0.000018                      |         | 1 grain                                         |       |                                                 |      |                                                 |      |                                 |                    |          |         |
| 1                                 | 1980                          | 16  | 0.003296                                        | 0.002352 | 0.526                                           | 0.067 | 0.0331                                          | 0.0025  | 9.983                                           | 0.087 | 9.02                                            | 0.70 | 90.6                                            | 1.6  | 124.4                           | 9.3                |          |         |
| 2                                 | 5165                          | 18  | 0.000330                                        | 0.000749 | 0.727                                           | 0.027 | 0.0731                                          | 0.0017  | 10.711                                          | 0.042 | 10.64                                           | 0.23 | 99.5                                            | 4.1  | 145.9                           | 3.0                |          |         |
| 3                                 | 30199                         | 44  | 0.000316                                        | 0.000136 | 0.641                                           | 0.005 | 0.0191                                          | 0.0004  | 9.623                                           | 0.016 | 9.55                                            | 0.04 | 99.5                                            | 23.7 | 131.5                           | 0.6                |          |         |
| 4                                 | 776                           | 14  | 0.002671                                        | 0.004460 | 0.800                                           | 0.174 | 0.0150                                          | 0.0075  | 11.173                                          | 0.216 | 10.42                                           | 1.33 | 93.4                                            | 0.6  | 142.9                           | 17.6               |          |         |
| 5                                 | 675                           | 10  | 0.009218                                        | 0.004959 | 0.806                                           | 0.204 | 0.0053                                          | 0.0074  | 11.525                                          | 0.202 | 8.83                                            | 1.48 | 76.8                                            | 0.5  | 121.9                           | 19.7               |          |         |
| 6                                 | 13712                         | 28  | 0.001400                                        | 0.000339 | 0.715                                           | 0.018 | 0.0147                                          | 0.0008  | 9.952                                           | 0.022 | 9.56                                            | 0.10 | 96.3                                            | 10.8 | 131.7                           | 1.4                |          |         |
| 7                                 | 49068                         | 75  | 0.000545                                        | 0.000106 | 0.621                                           | 0.005 | 0.0153                                          | 0.0002  | 9.659                                           | 0.016 | 9.52                                            | 0.04 | 98.8                                            | 38.5 | 131.0                           | 0.5                |          |         |
| 8                                 | 5313                          | 15  | 0.006968                                        | 0.000804 | 3.110                                           | 0.026 | 0.0329                                          | 0.0009  | 14.541                                          | 0.045 | 12.69                                           | 0.24 | 87.2                                            | 4.2  | 172.7                           | 3.2                |          |         |
| 9                                 | 6036                          | 15  | 0.003903                                        | 0.000374 | 15.952                                          | 0.103 | 0.0728                                          | 0.0016  | 13.652                                          | 0.038 | 13.67                                           | 0.12 | 99.3                                            | 4.7  | 185.4                           | 1.6                |          |         |
| 10                                | 2753                          | 18  | 0.038386                                        | 0.002063 | 107.695                                         | 0.814 | 0.3730                                          | 0.0054  | 18.488                                          | 0.128 | 15.29                                           | 0.66 | 77.3                                            | 2.2  | 206.2                           | 8.4                |          |         |
| 11                                | 11764                         | 56  | 0.057703                                        | 0.000767 | 101.506                                         | 0.514 | 0.2152                                          | 0.0022  | 23.806                                          | 0.127 | 14.37                                           | 0.25 | 56.7                                            | 9.2  | 194.4                           | 3.2                |          |         |
|                                   |                               |     |                                                 |          |                                                 |       |                                                 |         |                                                 |       |                                                 |      |                                                 |      |                                 | Total gas age:     | 142.6    | 0.6     |
| <b>Sample: BDG-84_Lab 09s0662</b> |                               |     |                                                 |          |                                                 |       |                                                 |         |                                                 |       |                                                 |      |                                                 |      |                                 |                    |          |         |
|                                   |                               |     |                                                 |          | 200-250 μm                                      |       | J-Value: 0.007930±0.000018                      |         | 8 grains                                        |       |                                                 |      |                                                 |      |                                 |                    |          |         |
| 1                                 | 12442                         | 25  | 0.000701                                        | 0.000405 | 0.565                                           | 0.018 | 0.0241                                          | 0.0007  | 13.708                                          | 0.029 | 13.52                                           | 0.12 | 98.8                                            | 55.0 | 183.7                           | 1.6                |          |         |
| 2                                 | 2909                          | 22  | 0.000656                                        | 0.001048 | 1.744                                           | 0.065 | 0.1879                                          | 0.0038  | 12.675                                          | 0.103 | 12.58                                           | 0.33 | 99.4                                            | 12.9 | 171.6                           | 4.3                |          |         |
| 3                                 | 414                           | 11  | 0.001518                                        | 0.010155 | 3.600</                                         |       |                                                 |         |                                                 |       |                                                 |      |                                                 |      |                                 |                    |          |         |
