# Supplementary material
Source: publisher figshare collection journal article supplement (https://geolsoc.figshare.com/articles/dataset/_/3453197)

172405E+02 1.22075

sample field number ALT-13
project description FWF P22-728
number of measurement 0740701
number of irradiation 21-90
value of irradiation 0.010880
duration of irradiation [h] 16.0
year of irradiation 2007
julian day of irradiation 57

material: Polyhallt
grain size: 200-250 µm
number: S
notes: Altusee mine
(±1-sigma)

conversion from [V] to [cps] by: 6E+07
composition of atmospheric argon: 40Ar/36Ar/38Ar = 295.5 +/- 1sigma
half-life of 37Ar [d] = 35.1
decay constant of 37Ar [dE-01] = 1.975E-02
decay constant of 39Ar [dE-01] = 7.984E-06
decay constant of 40K [dE-01] = 5.543E-10
correction for Ca-derived Ar: 2.200E-04
correction for K-derived Ar: 6.1400E-04
correction for K-derived Ar: 2.600E-02
correction for K-derived Ar: 1.1700E-02

Table with columns: sample, 36Ar, 37Ar, 38Ar, 39Ar, 40Ar, date of measurement, year, jday. It contains multiple rows of data for different samples and irradiation steps.

Table with columns: days elapsed, post-irrad. 37Ar decay factor, number of steps, mean of dec 37Ar, corr. factor. It provides summary statistics for the measurements.

Table with columns: blank- and background-corrected intensities and absolute errors (1-sigma abs.). It lists various isotopes and their measured values with associated uncertainties.

Table with columns: 36Ar, 37Ar, 38Ar, 39Ar, 40Ar, 36Ar/36Ar, 37Ar/36Ar, 38Ar/36Ar, 39Ar/36Ar, 40Ar/36Ar, age, +1-sigma, -1-sigma. This is a large summary table for the entire dataset.

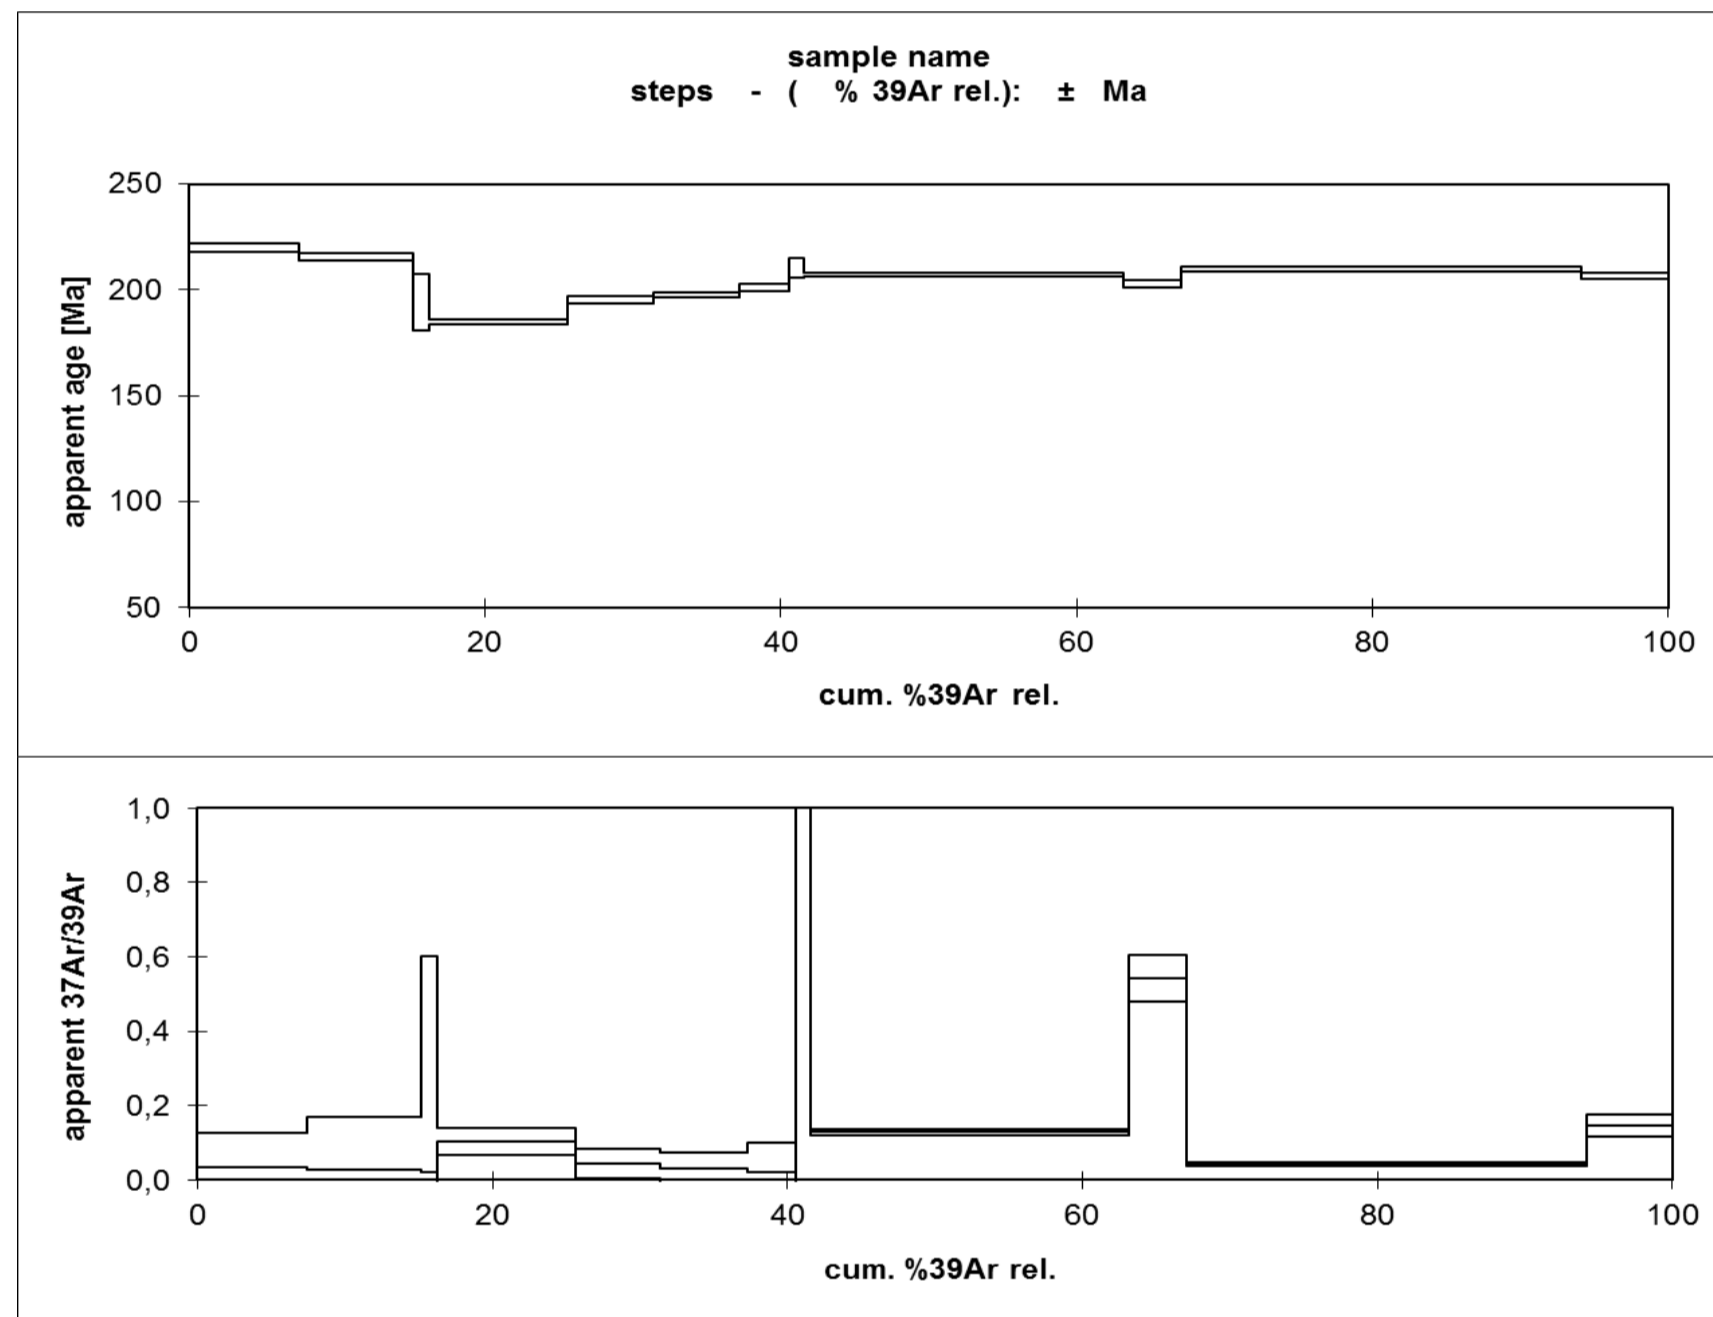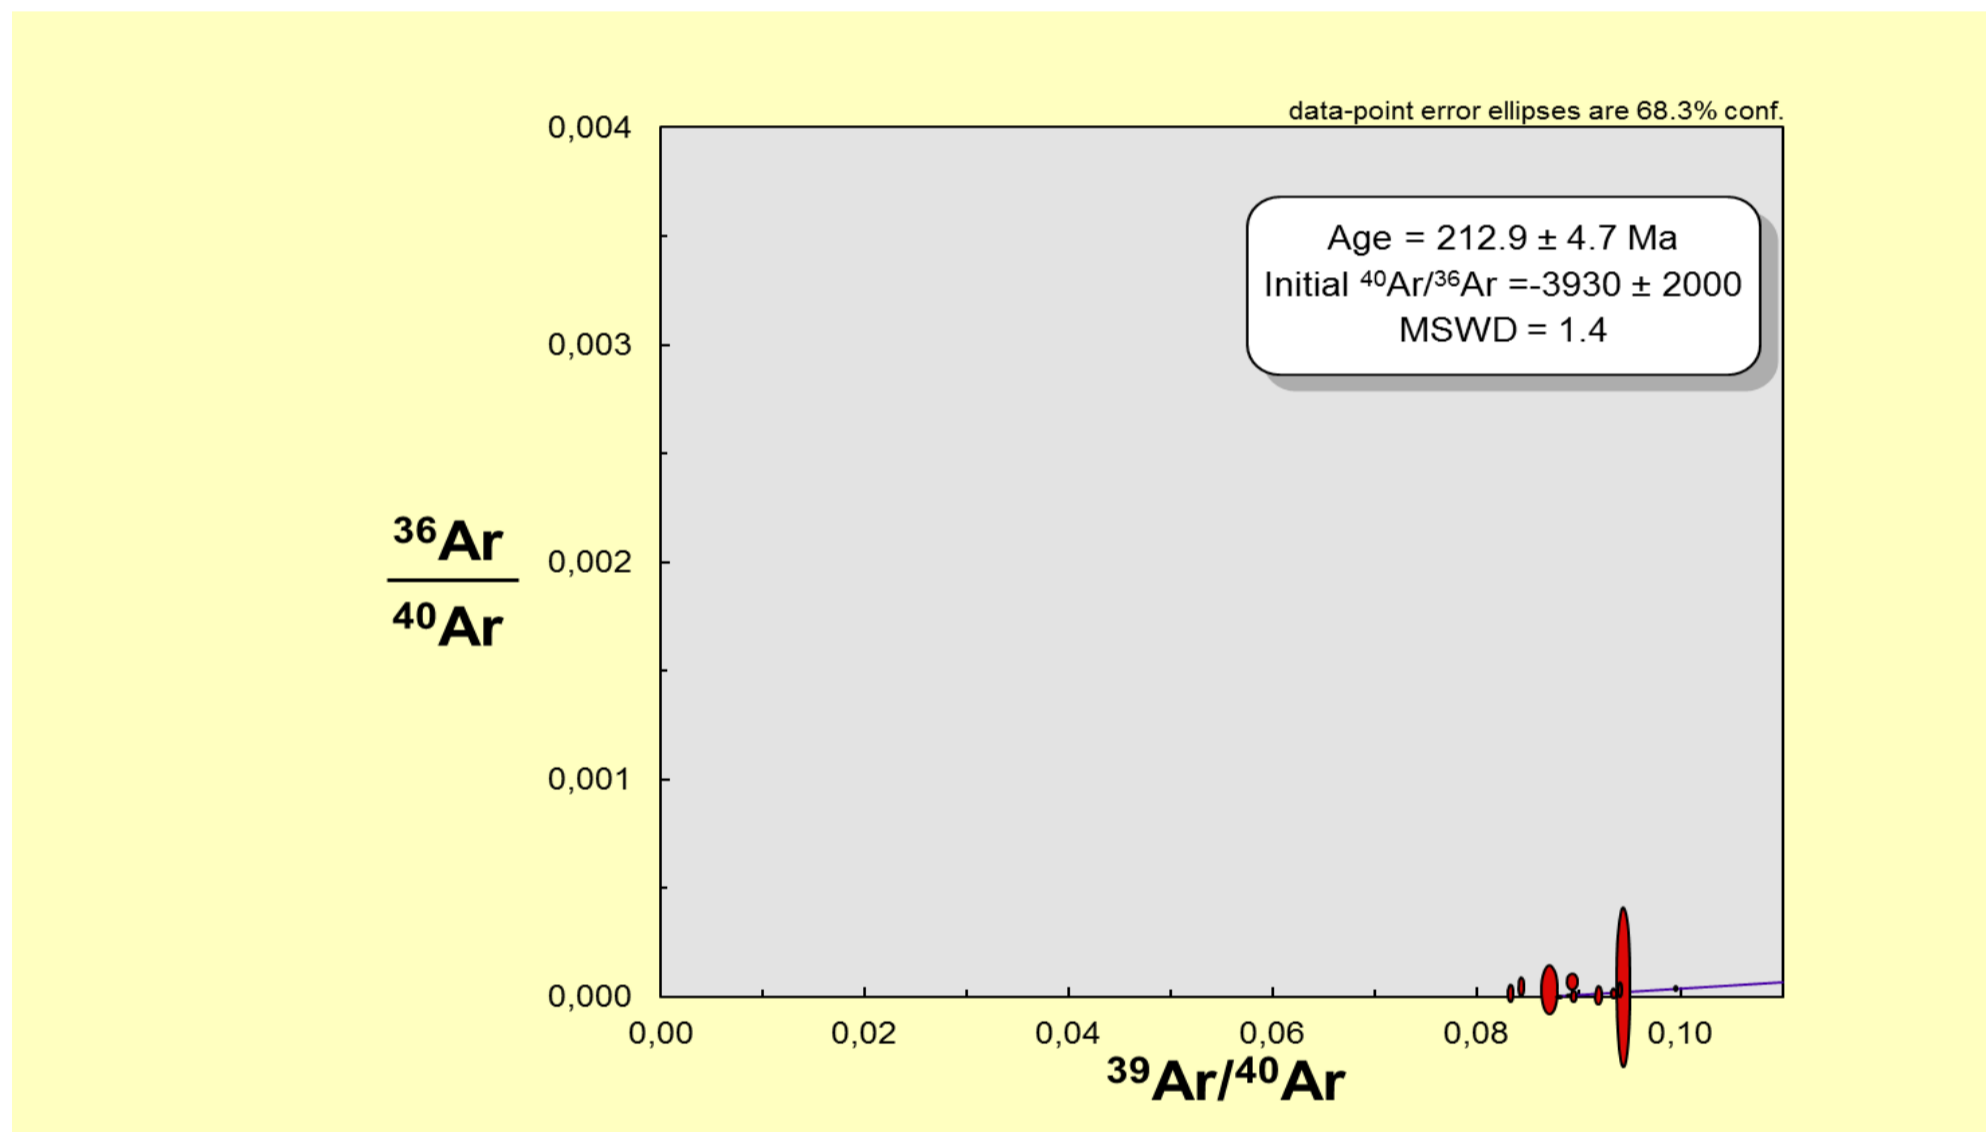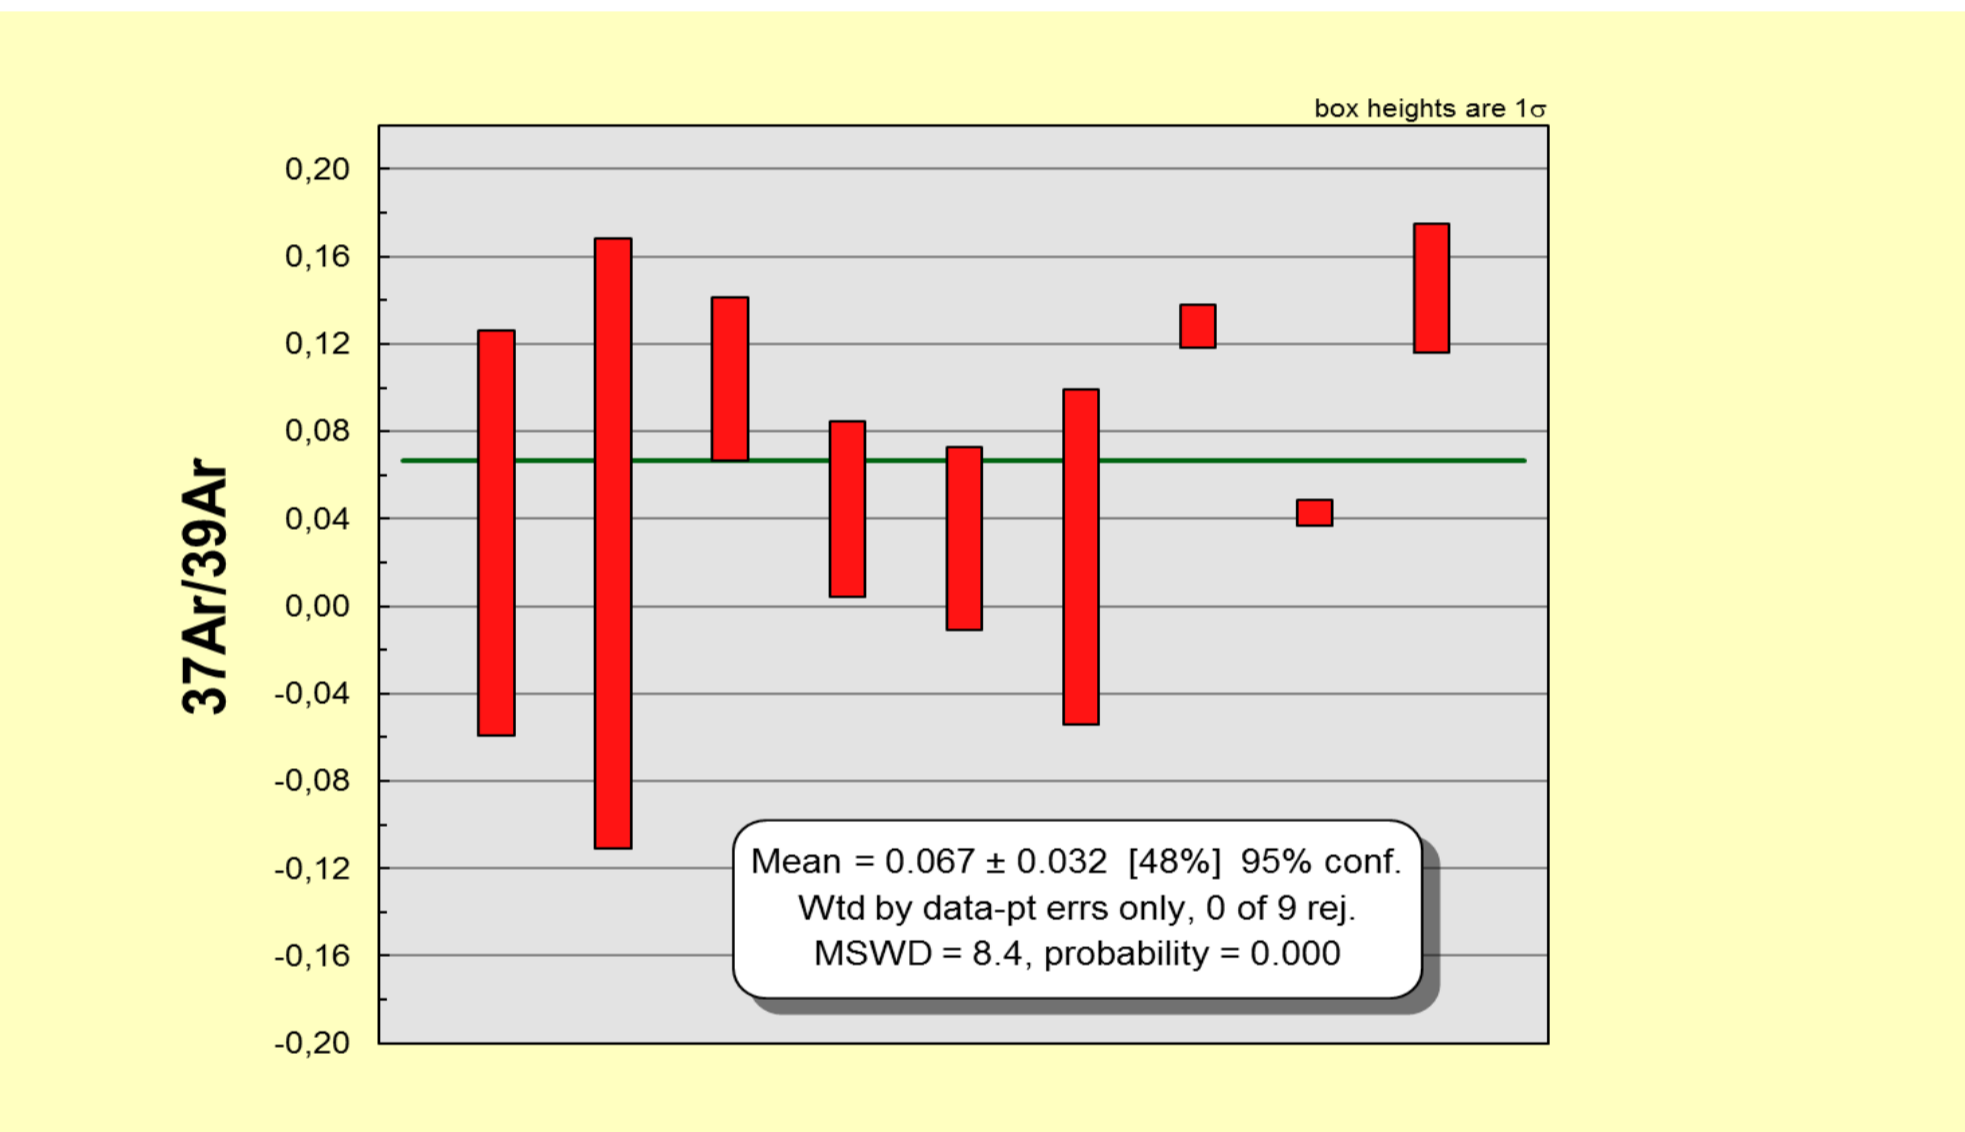

Supplement: Supplementary file 9 [file 1]
